# Supplementary material for: Sequencing, Annotation and Analysis of the Syrian Hamster (Mesocricetus auratus) Transcriptome
Source: PubMed Central journal article supplement (PMC4232415; doi:10.1371/journal.pone.0112617), 2014-11-14

# SUPPLEMENTARY FIGURE 1

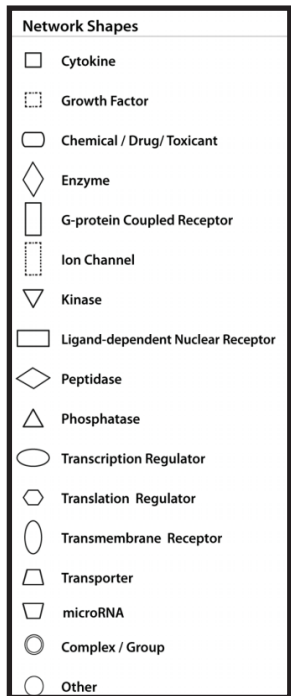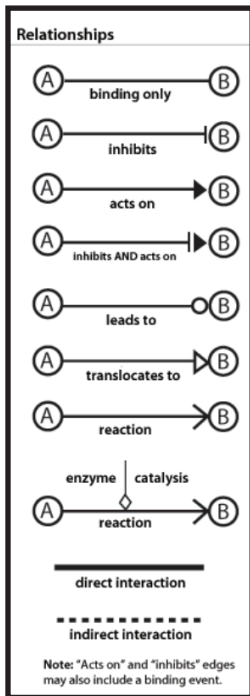

Supplement: pone.0112617.s001.pdf [file pone.0112617.s001.pdf]
