# Supplementary material for: Sequencing, Annotation and Analysis of the Syrian Hamster (Mesocricetus auratus) Transcriptome
Source: PLoS One. 2014 Nov 14;9(11):e112617. doi: 10.1371/journal.pone.0112617 (PMC4232415; doi:10.1371/journal.pone.0112617)
Supplement: Table S1 — List of highly-covered transcripts by the Syrian hamster transcriptome. Table showing the 214 highly-covered transcripts (transcripts mapped at least at 90% by the contigs and singletons) based on the mouse annotations. For each highly-covered transcript, the Ensembl Mouse gene identified, the associated gene name as well as the gene description is indicated. (TXT) [file pone.0112617.s002.pdf]

Ensembl Transcript ID	Associated Gene Name	Description
ENSMUST00000000194	Ccl12	chemokine (C-C motif) ligand 12 [Source:MGI Symbol;Acc:MGI:108224]
ENSMUST00000001046	S100a4	S100 calcium binding protein A4 [Source:MGI Symbol;Acc:MGI:1330282]
ENSMUST00000001716	Ddt	D-dopachrome tautomerase [Source:MGI Symbol;Acc:MGI:1298381]
ENSMUST00000003071	Apoc4	apolipoprotein C-IV [Source:MGI Symbol;Acc:MGI:87878]
ENSMUST00000003521	Rps11	ribosomal protein S11 [Source:MGI Symbol;Acc:MGI:1351329]
ENSMUST00000004057	Fam162a	family with sequence similarity 162, member A [Source:MGI Symbol;Acc:MGI:1917436]
ENSMUST00000004200	Cwc15	CWC15 homolog (S. cerevisiae) [Source:MGI Symbol;Acc:MGI:1913320]
ENSMUST00000006523	Crip1	cysteine-rich protein 1 (intestinal) [Source:MGI Symbol;Acc:MGI:88501]
ENSMUST00000008036	Rplp1	ribosomal protein, large, P1 [Source:MGI Symbol;Acc:MGI:1927099]
ENSMUST00000008812	Rps18	ribosomal protein S18 [Source:MGI Symbol;Acc:MGI:98146]
ENSMUST00000008966	Acyp1	acylphosphatase 1, erythrocyte (common) type [Source:MGI Symbol;Acc:MGI:1913454]
ENSMUST00000010520	Nedd8	neural precursor cell expressed, developmentally down-regulated gene 8 [Source:MGI Symbol;Acc:MGI:97301]
ENSMUST00000010550	Mrpl52	mitochondrial ribosomal protein L52 [Source:MGI Symbol;Acc:MGI:1916086]
ENSMUST00000012627	Rpa3	replication protein A3 [Source:MGI Symbol;Acc:MGI:1915490]
ENSMUST00000014445	Pam16	presequence translocase-asssociated motor 16 homolog (S. cerevisiae) [Source:MGI Symbol;Acc:MGI:1913699]
ENSMUST00000016571	Ndufa1	NADH dehydrogenase (ubiquinone) 1 alpha subcomplex, 1 [Source:MGI Symbol;Acc:MGI:1929511]
ENSMUST00000020064	Fam162b	family with sequence similarity 162, member B [Source:MGI Symbol;Acc:MGI:1924546]
ENSMUST00000020397	Snrpd3	small nuclear ribonucleoprotein D3 [Source:MGI Symbol;Acc:MGI:1914582]
ENSMUST00000020504	Hint1	histidine triad nucleotide binding protein 1 [Source:MGI Symbol;Acc:MGI:1321133]
ENSMUST00000021332	Fkbp3	FK506 binding protein 3 [Source:MGI Symbol;Acc:MGI:1353460]
ENSMUST00000021667	Isca2	iron-sulfur cluster assembly 2 homolog (S. cerevisiae) [Source:MGI Symbol;Acc:MGI:1921566]
ENSMUST00000021719	2010107E04Rik	RIKEN cDNA 2010107E04 gene [Source:MGI Symbol;Acc:MGI:1917507]
ENSMUST00000021993	Uqcrb	ubiquinol-cytochrome c reductase binding protein [Source:MGI Symbol;Acc:MGI:1914780]
ENSMUST00000022590	Dnajc15	DnaJ (Hsp40) homolog, subfamily C, member 15 [Source:MGI Symbol;Acc:MGI:1913398]
ENSMUST00000022962	Emc2	ER membrane protein complex subunit 2 [Source:MGI Symbol;Acc:MGI:1913986]
ENSMUST00000022980	Ndufb9	NADH dehydrogenase (ubiquinone) 1 beta subcomplex, 9 [Source:MGI Symbol;Acc:MGI:1913468]
ENSMUST00000023062	Tomm22	translocase of outer mitochondrial membrane 22 homolog (yeast) [Source:MGI Symbol;Acc:MGI:2450248]
ENSMUST00000023085	Ndufa6	NADH dehydrogenase (ubiquinone) 1 alpha subcomplex, 6 (B14) [Source:MGI Symbol;Acc:MGI:1914380]
ENSMUST00000024734	Mrpl14	mitochondrial ribosomal protein L14 [Source:MGI Symbol;Acc:MGI:1333864]
ENSMUST00000024831	Tff1	trefoil factor 1 [Source:MGI Symbol;Acc:MGI:88135]
ENSMUST00000025045	2900010M23Rik	RIKEN cDNA 2900010M23 gene [Source:MGI Symbol;Acc:MGI:1914517]
ENSMUST00000026405	Bloc1s1	biogenesis of lysosome-related organelles complex-1, subunit 1 [Source:MGI Symbol;Acc:MGI:1195276]
ENSMUST00000026420	Rps26	ribosomal protein S26 [Source:MGI Symbol;Acc:MGI:1351628]
ENSMUST00000026561	Cox8b	cytochrome c oxidase, subunit VIIIb [Source:MGI Symbol;Acc:MGI:105958]
ENSMUST00000026881	Ly96	lymphocyte antigen 96 [Source:MGI Symbol;Acc:MGI:1341909]
ENSMUST00000026986	Higd2a	HIG1 domain family, member 2A [Source:MGI Symbol;Acc:MGI:1914294]
ENSMUST00000027193	Ndufb3	NADH dehydrogenase (ubiquinone) 1 beta subcomplex 3 [Source:MGI Symbol;Acc:MGI:1913745]
ENSMUST00000027634	Dbi	diazepam binding inhibitor [Source:MGI Symbol;Acc:MGI:94865]
ENSMUST00000027781	Fam36a	family with sequence similarity 36, member A [Source:MGI Symbol;Acc:MGI:1913609]
ENSMUST00000028470	Timm10	translocase of inner mitochondrial membrane 10 [Source:MGI Symbol;Acc:MGI:1353429]
ENSMUST00000028677	2310003F16Rik	RIKEN cDNA 2310003F16 gene [Source:MGI Symbol;Acc:MGI:1914943]
ENSMUST00000029041	Fabp4	fatty acid binding protein 4, adipocyte [Source:MGI Symbol;Acc:MGI:88038]
ENSMUST00000029515	S100a11	S100 calcium binding protein A11 (calgizzarin) [Source:MGI Symbol;Acc:MGI:1338798]
ENSMUST00000030348	Magoh	mago-nashi homolog, proliferation-associated (Drosophila) [Source:MGI Symbol;Acc:MGI:1330312]
ENSMUST00000031024	Mrpl33	mitochondrial ribosomal protein L33 [Source:MGI Symbol;Acc:MGI:2137225]
ENSMUST00000031320	Pf4	platelet factor 4 [Source:MGI Symbol;Acc:MGI:1888711]
ENSMUST00000031637	Ndufa4	NADH dehydrogenase (ubiquinone) 1 alpha subcomplex, 4 [Source:MGI Symbol;Acc:MGI:107686]
ENSMUST00000031843	Npy	neuropeptide Y [Source:MGI Symbol;Acc:MGI:97374]
ENSMUST00000032342	Mgp	matrix Gla protein [Source:MGI Symbol;Acc:MGI:96976]
ENSMUST00000032800	Tyrobp	TYRO protein tyrosine kinase binding protein [Source:MGI Symbol;Acc:MGI:1277211]
ENSMUST00000034215	Mt1	metallothionein 1 [Source:MGI Symbol;Acc:MGI:97171]
ENSMUST00000035301	Atp6v1g1	ATPase, H+ transporting, lysosomal V1 subunit G1 [Source:MGI Symbol;Acc:MGI:1913540]
ENSMUST00000035725	Brk1	BRICK1, SCAR/WAVE actin-nucleating complex subunit [Source:MGI Symbol;Acc:MGI:1915406]
ENSMUST00000036045	Leap2	liver-expressed antimicrobial peptide 2 [Source:MGI Symbol;Acc:MGI:2672795]
ENSMUST00000037023	Rps29	ribosomal protein S29 [Source:MGI Symbol;Acc:MGI:107681]
ENSMUST00000038169	Mif	macrophage migration inhibitory factor [Source:MGI Symbol;Acc:MGI:96982]
ENSMUST00000038673	Anapc13	anaphase promoting complex subunit 13 [Source:MGI Symbol;Acc:MGI:1916260]
ENSMUST00000040154	Cox6a1	cytochrome c oxidase, subunit VI a, polypeptide 1 [Source:MGI Symbol;Acc:MGI:103099]
ENSMUST00000040917	Rps27l	ribosomal protein S27-like [Source:MGI Symbol;Acc:MGI:1915191]
ENSMUST00000041366	Polr2j	polymerase (RNA) II (DNA directed) polypeptide J [Source:MGI Symbol;Acc:MGI:109582]
ENSMUST00000043074	Fau	Finkel-Biskis-Reilly murine sarcoma virus (FBR-MuSV) ubiquitously expressed (fox derived) [Source:MGI Symbol;Acc:MGI:102547]
ENSMUST00000043675	Atp5l	ATP synthase, H+ transporting, mitochondrial F0 complex, subunit g [Source:MGI Symbol;Acc:MGI:1351597]
ENSMUST00000043867	Rpl22l1	ribosomal protein L22 like 1 [Source:MGI Symbol;Acc:MGI:1915278]
ENSMUST00000043931	Atp5h	ATP synthase, H+ transporting, mitochondrial F0 complex, subunit d [Source:MGI Symbol;Acc:MGI:1918929]
ENSMUST00000044051	Timm8b	translocase of inner mitochondrial membrane 8B [Source:MGI Symbol;Acc:MGI:1353424]
ENSMUST00000044584	Lgals2	lectin, galactose-binding, soluble 2 [Source:MGI Symbol;Acc:MGI:895068]
ENSMUST00000045035	Apoc1	apolipoprotein C-I [Source:MGI Symbol;Acc:MGI:88053]
ENSMUST00000045756	S100a10	S100 calcium binding protein A10 (calpactin) [Source:MGI Symbol;Acc:MGI:1339468]
ENSMUST00000045887	Cisd1	CDGSH iron sulfur domain 1 [Source:MGI Symbol;Acc:MGI:1261855]
ENSMUST00000046558	Hspb11	heat shock protein family B (small), member 11 [Source:MGI Symbol;Acc:MGI:1920188]
ENSMUST00000046644	Tbca	tubulin cofactor A [Source:MGI Symbol;Acc:MGI:107549]
ENSMUST00000048249	Ndufa7	NADH dehydrogenase (ubiquinone) 1 alpha subcomplex, 7 (B14.5a) [Source:MGI Symbol;Acc:MGI:1913666]
ENSMUST00000050273	Cox17	cytochrome c oxidase, subunit XVII assembly protein homolog (yeast) [Source:MGI Symbol;Acc:MGI:1333806]
ENSMUST00000052867	Gm9843	predicted gene 9843 [Source:MGI Symbol;Acc:MGI:3708621]
ENSMUST00000053150	Gm9846	predicted gene 9846 [Source:MGI Symbol;Acc:MGI:3704345]
ENSMUST00000053575	Gm8186	predicted gene 8186 [Source:MGI Symbol;Acc:MGI:3643110]
ENSMUST00000054544	Rpl36al	ribosomal protein L36A-like [Source:MGI Symbol;Acc:MGI:1913733]
ENSMUST00000056038	3110009E18Rik	RIKEN cDNA 3110009E18 gene [Source:MGI Symbol;Acc:MGI:1920353]
ENSMUST00000058407	Uqcr10	ubiquinol-cytochrome c reductase, complex III subunit X [Source:MGI Symbol;Acc:MGI:1913402]
ENSMUST00000059080	Rps21	ribosomal protein S21 [Source:MGI Symbol;Acc:MGI:1913731]
ENSMUST00000060133	4732415M23Rik	RIKEN cDNA 4732415M23 gene [Source:MGI Symbol;Acc:MGI:2444920]
ENSMUST00000060477	Gm5514	predicted gene 5514 [Source:MGI Symbol;Acc:MGI:3645435]
ENSMUST00000061444	Mrps16	mitochondrial ribosomal protein S16 [Source:MGI Symbol;Acc:MGI:1913492]
ENSMUST00000063040	Minos1	mitochondrial inner membrane organizing system 1 [Source:MGI Symbol;Acc:MGI:1913628]
ENSMUST00000063641	Fam165b	family with sequence similarity 165, member B [Source:MGI Symbol;Acc:MGI:1916186]
ENSMUST00000064798	Ndufv3	NADH dehydrogenase (ubiquinone) flavoprotein 3 [Source:MGI Symbol;Acc:MGI:1890894]
ENSMUST00000065678	Sec61b	Sec61 beta subunit [Source:MGI Symbol;Acc:MGI:1913462]
ENSMUST00000067298	Mrps21	mitochondrial ribosomal protein S21 [Source:MGI Symbol;Acc:MGI:1913542]
ENSMUST00000067492	Fabp1	fatty acid binding protein 1, liver [Source:MGI Symbol;Acc:MGI:95479]
ENSMUST00000067496	Atpif1	ATPase inhibitory factor 1 [Source:MGI Symbol;Acc:MGI:1196457]
ENSMUST00000068408	Rps15	ribosomal protein S15 [Source:MGI Symbol;Acc:MGI:98117]
ENSMUST00000069579	Tceb2	transcription elongation factor B (SIII), polypeptide 2 [Source:MGI Symbol;Acc:MGI:1914923]
ENSMUST00000069927	S100a8	S100 calcium binding protein A8 (calgranulin A) [Source:MGI Symbol;Acc:MGI:88244]
ENSMUST00000071215	Chchd1	coiled-coil-helix-coiled-coil-helix domain containing 1 [Source:MGI Symbol;Acc:MGI:1913371]
ENSMUST00000072323	Rpl34-ps1	ribosomal protein L34, pseudogene 1 [Source:MGI Symbol;Acc:MGI:3704270]
ENSMUST00000073471	Rpl26	ribosomal protein L26 [Source:MGI Symbol;Acc:MGI:106022]
ENSMUST00000074359	Klk1b5	kallikrein 1-related peptidase b5 [Source:MGI Symbol;Acc:MGI:892020]
ENSMUST00000074576	Gm12338	predicted gene 12338 [Source:MGI Symbol;Acc:MGI:3650622]
ENSMUST00000075062	Hcst	hematopoietic cell signal transducer [Source:MGI Symbol;Acc:MGI:1344360]
ENSMUST00000075738	Cox6b1	cytochrome c oxidase, subunit VIb polypeptide 1 [Source:MGI Symbol;Acc:MGI:107460]
ENSMUST00000075829	Mrpl42	mitochondrial ribosomal protein L42 [Source:MGI Symbol;Acc:MGI:1333774]
ENSMUST00000075853	Cks2	CDC28 protein kinase regulatory subunit 2 [Source:MGI Symbol;Acc:MGI:1913447]
ENSMUST00000076070	Zcrb1	zinc finger CCHC-type and RNA binding motif 1 [Source:MGI Symbol;Acc:MGI:1914447]
ENSMUST00000076657	Ndufa3	NADH dehydrogenase (ubiquinone) 1 alpha subcomplex, 3 [Source:MGI Symbol;Acc:MGI:1913341]
ENSMUST00000077208	Rps26-ps1	ribosomal protein S26, pseudogene 1 [Source:MGI Symbol;Acc:MGI:3704322]
ENSMUST00000078170	Dynlrb2	dynein light chain roadblock-type 2 [Source:MGI Symbol;Acc:MGI:1922715]
ENSMUST00000078676	Uqcrh	ubiquinol-cytochrome c reductase hinge protein [Source:MGI Symbol;Acc:MGI:1913826]
ENSMUST00000078804	Rpl35a	ribosomal protein L35A [Source:MGI Symbol;Acc:MGI:1928894]
ENSMUST00000078845	Gmfg	glia maturation factor, gamma [Source:MGI Symbol;Acc:MGI:1927135]
ENSMUST00000079085	Rpl34	ribosomal protein L34 [Source:MGI Symbol;Acc:MGI:1915686]
ENSMUST00000079957	Fcer1g	Fc receptor, IgE, high affinity I, gamma polypeptide [Source:MGI Symbol;Acc:MGI:95496]
ENSMUST00000080492	Rpl36	ribosomal protein L36 [Source:MGI Symbol;Acc:MGI:1860603]
ENSMUST00000080813	Rps17	ribosomal protein S17 [Source:MGI Symbol;Acc:MGI:1309526]
ENSMUST00000081180	Cox5b	cytochrome c oxidase, subunit Vb [Source:MGI Symbol;Acc:MGI:88475]
ENSMUST00000081840	Rpl32	ribosomal protein L32 [Source:MGI Symbol;Acc:MGI:98038]
ENSMUST00000081940	Uba52	ubiquitin A-52 residue ribosomal protein fusion product 1 [Source:MGI Symbol;Acc:MGI:98887]
ENSMUST00000082388	mt-Rnr1	mitochondrially encoded 12S rRNA [Source:MGI Symbol;Acc:MGI:102493]
ENSMUST00000082409	mt-Co3	mitochondrially encoded cytochrome c oxidase III [Source:MGI Symbol;Acc:MGI:102502]
ENSMUST00000086596	Rpl31-ps9	ribosomal protein L31, pseudogene 9 [Source:MGI Symbol;Acc:MGI:3704195]
ENSMUST00000086764	Rps12-ps3	ribosomal protein S12, pseudogene 3 [Source:MGI Symbol;Acc:MGI:3704503]
ENSMUST00000087137	Gm7335	predicted gene 7335 [Source:MGI Symbol;Acc:MGI:3644473]
ENSMUST00000087454	Rps25-ps1	ribosomal protein S25, pseudogene 1 [Source:MGI Symbol;Acc:MGI:3642902]
ENSMUST00000088299	Gm10221	predicted gene 10221 [Source:MGI Symbol;Acc:MGI:3708709]
ENSMUST00000088648	Rpl31-ps8	ribosomal protein L31, pseudogene 8 [Source:MGI Symbol;Acc:MGI:3647726]
ENSMUST00000089182	Gm10231	predicted pseudogene 10231 [Source:MGI Symbol;Acc:MGI:3704468]
ENSMUST00000090031	Gng5	guanine nucleotide binding protein (G protein), gamma 5 [Source:MGI Symbol;Acc:MGI:109164]
ENSMUST00000093207	Hba-a2	hemoglobin alpha, adult chain 2 [Source:MGI Symbol;Acc:MGI:96016]
ENSMUST00000093955	Supt4h1	suppressor of Ty 4 homolog 1 (S. cerevisiae) [Source:MGI Symbol;Acc:MGI:107416]
ENSMUST00000094065	1810027O10Rik	RIKEN cDNA 1810027O10 gene [Source:MGI Symbol;Acc:MGI:1916436]
ENSMUST00000096014	Usmg5	upregulated during skeletal muscle growth 5 [Source:MGI Symbol;Acc:MGI:1891435]
ENSMUST00000096143	Atf7	activating transcription factor 7 [Source:MGI Symbol;Acc:MGI:2443472]
ENSMUST00000096251	1810009A15Rik	RIKEN cDNA 1810009A15 gene [Source:MGI Symbol;Acc:MGI:1913526]
ENSMUST00000097642	Myeov2	myeloma overexpressed 2 [Source:MGI Symbol;Acc:MGI:1914165]
ENSMUST00000098594	Cox7a1	cytochrome c oxidase, subunit VIIa 1 [Source:MGI Symbol;Acc:MGI:1316714]
ENSMUST00000099371	Gm4149	predicted pseudogene 4149 [Source:MGI Symbol;Acc:MGI:3782325]
ENSMUST00000102483	Rpl23a	ribosomal protein L23A [Source:MGI Symbol;Acc:MGI:3040672]
ENSMUST00000102525	Arpc3	actin related protein 2/3 complex, subunit 3 [Source:MGI Symbol;Acc:MGI:1928375]
ENSMUST00000102814	Rps6	ribosomal protein S6 [Source:MGI Symbol;Acc:MGI:98159]
ENSMUST00000102921	Myl7	myosin, light polypeptide 7, regulatory [Source:MGI Symbol;Acc:MGI:107495]
ENSMUST00000103330	AC120404.2
ENSMUST00000103366	AC155333.1
ENSMUST00000105932	Ins2	insulin II [Source:MGI Symbol;Acc:MGI:96573]
ENSMUST00000106003	Rplp2	ribosomal protein, large P2 [Source:MGI Symbol;Acc:MGI:1914436]
ENSMUST00000106318	Ppih	peptidyl prolyl isomerase H [Source:MGI Symbol;Acc:MGI:106499]
ENSMUST00000106599	Rpl38	ribosomal protein L38 [Source:MGI Symbol;Acc:MGI:1914921]
ENSMUST00000106602	Rpl38	ribosomal protein L38 [Source:MGI Symbol;Acc:MGI:1914921]
ENSMUST00000106749	Hspb11	heat shock protein family B (small), member 11 [Source:MGI Symbol;Acc:MGI:1920188]
ENSMUST00000106780	Fxc1	fractured callus expressed transcript 1 [Source:MGI Symbol;Acc:MGI:1315196]
ENSMUST00000107073	Higd1b	HIG1 domain family, member 1B [Source:MGI Symbol;Acc:MGI:1922939]
ENSMUST00000107709	Gngt2	guanine nucleotide binding protein (G protein), gamma transducing activity polypeptide 2 [Source:MGI Symbol;Acc:MGI:893584]
ENSMUST00000107711	Gngt2	guanine nucleotide binding protein (G protein), gamma transducing activity polypeptide 2 [Source:MGI Symbol;Acc:MGI:893584]
ENSMUST00000107810	Tomm5	translocase of outer mitochondrial membrane 5 homolog (yeast) [Source:MGI Symbol;Acc:MGI:1915762]
ENSMUST00000108083	Scgb1b30	secretoglobin, family 1B, member 30 [Source:MGI Symbol;Acc:MGI:3649901]
ENSMUST00000108087	Scgb1b24	secretoglobin, family 1B, member 24 [Source:MGI Symbol;Acc:MGI:3649643]
ENSMUST00000108110	Fxyd1	FXYD domain-containing ion transport regulator 1 [Source:MGI Symbol;Acc:MGI:1889273]
ENSMUST00000108386	Chchd7	coiled-coil-helix-coiled-coil-helix domain containing 7 [Source:MGI Symbol;Acc:MGI:1913683]
ENSMUST00000109021	Uqcrq	ubiquinol-cytochrome c reductase, complex III subunit VII [Source:MGI Symbol;Acc:MGI:107807]
ENSMUST00000109314	Syce3	synaptonemal complex central element protein 3 [Source:MGI Symbol;Acc:MGI:1922709]
ENSMUST00000109333	Mrps36	mitochondrial ribosomal protein S36 [Source:MGI Symbol;Acc:MGI:1913378]
ENSMUST00000112521	Smpx	small muscle protein, X-linked [Source:MGI Symbol;Acc:MGI:1913356]
ENSMUST00000113211	Rpl36a	ribosomal protein L36A [Source:MGI Symbol;Acc:MGI:1201789]
ENSMUST00000113627	Pin4	protein (peptidyl-prolyl cis/trans isomerase) NIMA-interacting, 4 (parvulin) [Source:MGI Symbol;Acc:MGI:1916963]
ENSMUST00000114227	Gng12	guanine nucleotide binding protein (G protein), gamma 12 [Source:MGI Symbol;Acc:MGI:1336171]
ENSMUST00000114882	Rps10	ribosomal protein S10 [Source:MGI Symbol;Acc:MGI:1914347]
ENSMUST00000116005	Gm11951	predicted gene 11951 [Source:MGI Symbol;Acc:MGI:3650315]
ENSMUST00000117167	S100a9	S100 calcium binding protein A9 (calgranulin B) [Source:MGI Symbol;Acc:MGI:1338947]
ENSMUST00000117354	l7Rn6	lethal, Chr 7, Rinchik 6 [Source:MGI Symbol;Acc:MGI:96738]
ENSMUST00000118924	Gm14934	predicted gene 14934 [Source:MGI Symbol;Acc:MGI:3802129]
ENSMUST00000119922	VKORC1	Vitamin K epoxide reductase complex subunit 1 [Source:UniProtKB/Swiss-Prot;Acc:Q9CRC0]
ENSMUST00000121848	Mia1	melanoma inhibitory activity 1 [Source:MGI Symbol;Acc:MGI:109615]
ENSMUST00000122119	Gm5776	predicted gene 5776 [Source:MGI Symbol;Acc:MGI:3647650]
ENSMUST00000123836	Uxt	ubiquitously expressed transcript [Source:MGI Symbol;Acc:MGI:1277988]
ENSMUST00000124932	Lsmd1	LSM domain containing 1 [Source:MGI Symbol;Acc:MGI:1925554]
ENSMUST00000126548	Ptpn22	protein tyrosine phosphatase, non-receptor type 22 (lymphoid) [Source:MGI Symbol;Acc:MGI:107170]
ENSMUST00000131453	Abcc5	ATP-binding cassette, sub-family C (CFTR/MRP), member 5 [Source:MGI Symbol;Acc:MGI:1351644]
ENSMUST00000132958	Spata5	spermatogenesis associated 5 [Source:MGI Symbol;Acc:MGI:1927170]
ENSMUST00000135190	Gm8292	predicted gene 8292 [Source:MGI Symbol;Acc:MGI:3648460]
ENSMUST00000135772	Adi1	acireductone dioxygenase 1 [Source:MGI Symbol;Acc:MGI:2144929]
ENSMUST00000136628	Gm561	predicted gene 561 [Source:MGI Symbol;Acc:MGI:2685407]
ENSMUST00000137961	Cstf3	cleavage stimulation factor, 3' pre-RNA, subunit 3 [Source:MGI Symbol;Acc:MGI:1351825]
ENSMUST00000137975	Dpm3	dolichyl-phosphate mannosyltransferase polypeptide 3 [Source:MGI Symbol;Acc:MGI:1915813]
ENSMUST00000140897	Tardbp	TAR DNA binding protein [Source:MGI Symbol;Acc:MGI:2387629]
ENSMUST00000142735	Rpl22	ribosomal protein L22 [Source:MGI Symbol;Acc:MGI:99262]
ENSMUST00000143114	Atat1	alpha tubulin acetyltransferase 1 [Source:MGI Symbol;Acc:MGI:1913869]
ENSMUST00000145318	Hscb	HscB iron-sulfur cluster co-chaperone homolog (E. coli) [Source:MGI Symbol;Acc:MGI:2141135]
ENSMUST00000147407	Ndufs6	NADH dehydrogenase (ubiquinone) Fe-S protein 6 [Source:MGI Symbol;Acc:MGI:107932]
ENSMUST00000147632	Psmg4	proteasome (prosome, macropain) assembly chaperone 4 [Source:MGI Symbol;Acc:MGI:1916916]
ENSMUST00000148968	Tmem29	transmembrane protein 29 [Source:MGI Symbol;Acc:MGI:1923420]
ENSMUST00000149615	Srp14	signal recognition particle 14 [Source:MGI Symbol;Acc:MGI:107169]
ENSMUST00000152286	Serf1	small EDRK-rich factor 1 [Source:MGI Symbol;Acc:MGI:1337114]
ENSMUST00000155574	Gm6851	predicted pseudogene 6851 [Source:MGI Symbol;Acc:MGI:3643618]
ENSMUST00000161040	Dab2	disabled 2, mitogen-responsive phosphoprotein [Source:MGI Symbol;Acc:MGI:109175]
ENSMUST00000161370	Hmgn3	high mobility group nucleosomal binding domain 3 [Source:MGI Symbol;Acc:MGI:2138069]
ENSMUST00000166014	Rpl35a-ps2	ribosomal protein L35A, pseudogene 2 [Source:MGI Symbol;Acc:MGI:3705461]
ENSMUST00000166332	Rpl21-ps8	ribosomal protein L21, pseudogene 8 [Source:MGI Symbol;Acc:MGI:3648345]
ENSMUST00000167504	Tma7	translational machinery associated 7 homolog (S. cerevisiae) [Source:MGI Symbol;Acc:MGI:1913417]
ENSMUST00000167850	Cope	coatomer protein complex, subunit epsilon [Source:MGI Symbol;Acc:MGI:1891702]
ENSMUST00000168900	Krtcap2	keratinocyte associated protein 2 [Source:MGI Symbol;Acc:MGI:1913309]
ENSMUST00000169443	Rpl21-ps15	ribosomal protein L21, pseudogene 15 [Source:MGI Symbol;Acc:MGI:3705426]
ENSMUST00000170308	Arpp19	cAMP-regulated phosphoprotein 19 [Source:MGI Symbol;Acc:MGI:1891691]
ENSMUST00000170382	Lsm5	LSM5 homolog, U6 small nuclear RNA associated (S. cerevisiae) [Source:MGI Symbol;Acc:MGI:1913623]
ENSMUST00000170669	Gm4540	predicted gene 4540 [Source:MGI Symbol;Acc:MGI:3782724]
ENSMUST00000170720	Sptlc2	serine palmitoyltransferase, long chain base subunit 2 [Source:MGI Symbol;Acc:MGI:108074]
ENSMUST00000170953	Rps13	ribosomal protein S13 [Source:MGI Symbol;Acc:MGI:1915302]
ENSMUST00000171526	Phf10	PHD finger protein 10 [Source:MGI Symbol;Acc:MGI:1919307]
ENSMUST00000173086	Mrpl23-ps1	mitichondrial ribosomal protein L23, pseudogene 1 [Source:MGI Symbol;Acc:MGI:3650679]
ENSMUST00000173480	Rps28	ribosomal protein S28 [Source:MGI Symbol;Acc:MGI:1859516]
ENSMUST00000178609	Gm12396	predicted gene 12396 [Source:MGI Symbol;Acc:MGI:3649201]
ENSMUST00000179134	Gm10243	predicted gene 10243 [Source:MGI Symbol;Acc:MGI:3704266]
ENSMUST00000179990	Ndufa12	NADH dehydrogenase (ubiquinone) 1 alpha subcomplex, 12 [Source:MGI Symbol;Acc:MGI:1913664]
ENSMUST00000180176	AC129942.1
ENSMUST00000180256	Rpl28-ps1	ribosomal protein L28, pseudogene 1 [Source:MGI Symbol;Acc:MGI:3705349]
ENSMUST00000181435	Gm14567	predicted gene 14567 [Source:MGI Symbol;Acc:MGI:3705732]
