# Supplementary material for: Sequencing, Annotation and Analysis of the Syrian Hamster (Mesocricetus auratus) Transcriptome
Source: PLoS One. 2014 Nov 14;9(11):e112617. doi: 10.1371/journal.pone.0112617 (PMC4232415; doi:10.1371/journal.pone.0112617)
Supplement: Table S2 — Alignment positions of the Syrian hamster transcriptome over the Chinese Hamster Ovary cell genome. Table showing the alignment positions of the Syrian hamster transcriptome sequences to the draft of the Chinese hamster genome. We found that 85,652 contigs and singletons of our library have been aligned on the Chinese Hamster Ovary cell genome draft. For each aligned Syrian hamster transcriptome sequence, the CHO genome segment, the start alignment position, the end alignment position, and the strand are indicated. (TXT) [file pone.0112617.s003.pdf]

Syrian hamster transcriptomic sequence id	Chinese hamster ovary (CHO) cell genome segment id	start	end	strand
F0ZWHJG01A00D0	gi|342607413|gb|AFTD01041519.1|	6030	5666	-
F0ZWHJG01A00HE	gi|342644318|gb|AFTD01004615.1|	23043	23407	+
F0ZWHJG01A00HT	gi|342645876|gb|AFTD01003057.1|	70616	70274	-
F0ZWHJG01A00HY	gi|342517629|gb|AFTD01117047.1|	33296	32993	-
F0ZWHJG01A00MR	gi|342632590|gb|AFTD01016343.1|	2169	1849	-
F0ZWHJG01A00XB	gi|342614016|gb|AFTD01034916.1|	5690	5579	-
F0ZWHJG01A010C	gi|342558322|gb|AFTD01077130.1|	59698	59532	-
F0ZWHJG01A017C	gi|342638394|gb|AFTD01010539.1|	46671	46327	-
F0ZWHJG01A01K0	gi|342506705|gb|AFTD01127850.1|	15072	15252	+
F0ZWHJG01A01O3	gi|342648151|gb|AFTD01000782.1|	17299	17240	-
F0ZWHJG01A01YM	gi|342559855|gb|AFTD01075597.1|	12089	11684	-
F0ZWHJG01A02EL	gi|342543918|gb|AFTD01091057.1|	92160	92574	+
F0ZWHJG01A02IY	gi|342386346|gb|AFTD01247194.1|	114	515	+
F0ZWHJG01A02Z5	gi|342482891|gb|AFTD01151580.1|	33822	34230	+
F0ZWHJG01A031T	gi|342509885|gb|AFTD01124670.1|	35228	34717	-
F0ZWHJG01A031X	gi|342493648|gb|AFTD01140823.1|	9518	9886	+
F0ZWHJG01A034M	gi|342620667|gb|AFTD01028265.1|	1336	1282	-
F0ZWHJG01A034U	gi|342557102|gb|AFTD01078350.1|	42752	42592	-
F0ZWHJG01A0363	gi|342635821|gb|AFTD01013112.1|	26755	26851	+
F0ZWHJG01A03RW	gi|342545908|gb|AFTD01089067.1|	14430	14598	+
F0ZWHJG01A048D	gi|342540038|gb|AFTD01094937.1|	1999	1519	-
F0ZWHJG01A04H7	gi|342504108|gb|AFTD01130447.1|	21605	21228	-
F0ZWHJG01A04IH	gi|342631055|gb|AFTD01017877.1|	7861	7986	+
F0ZWHJG01A04QL	gi|342516851|gb|AFTD01117805.1|	33345	32962	-
F0ZWHJG01A04SK	gi|342640950|gb|AFTD01007983.1|	88114	87820	-
F0ZWHJG01A04TB	gi|342488515|gb|AFTD01145956.1|	20289	20347	+
F0ZWHJG01A04Y3	gi|342640950|gb|AFTD01007983.1|	92227	91963	-
F0ZWHJG01A051S	gi|342512434|gb|AFTD01122121.1|	25887	26246	+
F0ZWHJG01A052C	gi|342552133|gb|AFTD01083319.1|	10894	10513	-
F0ZWHJG01A05F7	gi|342510235|gb|AFTD01124320.1|	52276	52609	+
F0ZWHJG01A05IM	gi|342642704|gb|AFTD01006229.1|	10529	10945	+
F0ZWHJG01A05JZ	gi|342523231|gb|AFTD01111744.1|	23979	23742	-
F0ZWHJG01A05Q0	gi|342571425|gb|AFTD01064027.1|	34466	34823	+
F0ZWHJG01A06AX	gi|342643226|gb|AFTD01005707.1|	24633	24124	-
F0ZWHJG01A06JO	gi|342620740|gb|AFTD01028192.1|	58927	59415	+
F0ZWHJG01A06LS	gi|342504665|gb|AFTD01129890.1|	12694	12323	-
F0ZWHJG01A06UM	gi|342621836|gb|AFTD01027096.1|	135484	135102	-
F0ZWHJG01A06XF	gi|342483907|gb|AFTD01150564.1|	579	737	+
F0ZWHJG01A06ZN	gi|342564496|gb|AFTD01070956.1|	685	301	-
F0ZWHJG01A079O	gi|342640152|gb|AFTD01008781.1|	12170	11984	-
F0ZWHJG01A07YZ	gi|342617298|gb|AFTD01031634.1|	9334	9170	-
F0ZWHJG01A0883	gi|342606810|gb|AFTD01042122.1|	20359	20115	-
F0ZWHJG01A08LI	gi|342596336|gb|AFTD01052596.1|	2796	3232	+
F0ZWHJG01A08VY	gi|342530070|gb|AFTD01104905.1|	9875	10212	+
F0ZWHJG01A08WK	gi|342490157|gb|AFTD01144314.1|	5332	5021	-
F0ZWHJG01A096H	gi|342551602|gb|AFTD01083850.1|	11796	11452	-
F0ZWHJG01A09DJ	gi|342625301|gb|AFTD01023631.1|	27087	26642	-
F0ZWHJG01A09FR	gi|342534373|gb|AFTD01100602.1|	152	500	+
F0ZWHJG01A09JS	gi|342535342|gb|AFTD01099633.1|	7115	6854	-
F0ZWHJG01A09LG	gi|342639747|gb|AFTD01009186.1|	28956	29347	+
F0ZWHJG01A09VN	gi|342485282|gb|AFTD01149189.1|	10998	10531	-
F0ZWHJG01A0A31	gi|342608447|gb|AFTD01040485.1|	72526	72773	+
F0ZWHJG01A0A6N	gi|342566241|gb|AFTD01069211.1|	51159	50998	-
F0ZWHJG01A0A8M	gi|342623466|gb|AFTD01025466.1|	26899	27255	+
F0ZWHJG01A0AVZ	gi|342542350|gb|AFTD01092625.1|	33553	33084	-
F0ZWHJG01A0B1W	gi|342631517|gb|AFTD01017415.1|	12092	11653	-
F0ZWHJG01A0B8C	gi|342488115|gb|AFTD01146356.1|	6761	6924	+
F0ZWHJG01A0B9V	gi|342627509|gb|AFTD01021423.1|	9178	8760	-
F0ZWHJG01A0BL8	gi|342519044|gb|AFTD01115754.1|	46504	46221	-
F0ZWHJG01A0BOL	gi|342587402|gb|AFTD01057620.1|	24140	24365	+
F0ZWHJG01A0C3O	gi|342527235|gb|AFTD01107740.1|	654	770	+
F0ZWHJG01A0C62	gi|342594568|gb|AFTD01054364.1|	11998	11621	-
F0ZWHJG01A0CKU	gi|342551029|gb|AFTD01084423.1|	6745	6418	-
F0ZWHJG01A0CMV	gi|342587286|gb|AFTD01057659.1|	2142	2457	+
F0ZWHJG01A0CRL	gi|342640950|gb|AFTD01007983.1|	88114	87820	-
F0ZWHJG01A0CVX	gi|342538019|gb|AFTD01096956.1|	40361	40744	+
F0ZWHJG01A0DAR	gi|342544340|gb|AFTD01090635.1|	24384	23928	-
F0ZWHJG01A0DRM	gi|342648636|gb|AFTD01000491.1|	1	391	+
F0ZWHJG01A0DU3	gi|342568864|gb|AFTD01066588.1|	554	422	-
F0ZWHJG01A0E3K	gi|342638880|gb|AFTD01010053.1|	32873	32555	-
F0ZWHJG01A0EBD	gi|342639821|gb|AFTD01009112.1|	25897	25519	-
F0ZWHJG01A0EEN	gi|342606690|gb|AFTD01042242.1|	27777	27968	+
F0ZWHJG01A0F2B	gi|342530596|gb|AFTD01104379.1|	10579	10773	+
F0ZWHJG01A0FCX	gi|342614552|gb|AFTD01034380.1|	51500	51302	-
F0ZWHJG01A0FME	gi|342597087|gb|AFTD01051845.1|	69668	69329	-
F0ZWHJG01A0FP6	gi|342555329|gb|AFTD01080123.1|	12465	12199	-
F0ZWHJG01A0G5I	gi|342532197|gb|AFTD01102778.1|	25800	25681	-
F0ZWHJG01A0GM3	gi|342614552|gb|AFTD01034380.1|	51801	51429	-
F0ZWHJG01A0GVK	gi|342497560|gb|AFTD01136911.1|	16265	15803	-
F0ZWHJG01A0GWL	gi|342565914|gb|AFTD01069538.1|	13819	14098	+
F0ZWHJG01A0HAA	gi|342597979|gb|AFTD01050953.1|	4642	4370	-
F0ZWHJG01A0HLQ	gi|342548797|gb|AFTD01086655.1|	4946	4840	-
F0ZWHJG01A0I21	gi|342565005|gb|AFTD01070447.1|	77963	78385	+
F0ZWHJG01A0I7F	gi|342540510|gb|AFTD01094465.1|	41076	41348	+
F0ZWHJG01A0IC8	gi|342618380|gb|AFTD01030552.1|	45929	46119	+
F0ZWHJG01A0J50	gi|342561837|gb|AFTD01073615.1|	15669	15308	-
F0ZWHJG01A0JEO	gi|342505082|gb|AFTD01129473.1|	13362	13016	-
F0ZWHJG01A0JFQ	gi|342582000|gb|AFTD01059429.1|	6376	6661	+
F0ZWHJG01A0K1K	gi|342531693|gb|AFTD01103282.1|	114480	114898	+
F0ZWHJG01A0K3L	gi|342638880|gb|AFTD01010053.1|	31197	30868	-
F0ZWHJG01A0K9N	gi|342593578|gb|AFTD01055106.1|	7112	6821	-
F0ZWHJG01A0KNO	gi|342531371|gb|AFTD01103604.1|	2279	2424	+
F0ZWHJG01A0KXW	gi|342534713|gb|AFTD01100262.1|	433	103	-
F0ZWHJG01A0L0Q	gi|342566823|gb|AFTD01068629.1|	7441	7768	+
F0ZWHJG01A0L2L	gi|342621996|gb|AFTD01026936.1|	42019	41661	-
F0ZWHJG01A0L3J	gi|342602183|gb|AFTD01046749.1|	15244	15333	+
F0ZWHJG01A0L6A	gi|342543906|gb|AFTD01091069.1|	51747	52223	+
F0ZWHJG01A0LF8	gi|342599523|gb|AFTD01049409.1|	41132	41456	+
F0ZWHJG01A0LL3	gi|342561870|gb|AFTD01073582.1|	4927	4665	-
F0ZWHJG01A0LV6	gi|342621425|gb|AFTD01027507.1|	34732	35226	+
F0ZWHJG01A0LYG	gi|342643523|gb|AFTD01005410.1|	24535	24381	-
F0ZWHJG01A0MSP	gi|342603716|gb|AFTD01045216.1|	15152	15004	-
F0ZWHJG01A0N4O	gi|342608447|gb|AFTD01040485.1|	72550	72722	+
F0ZWHJG01A0N8N	gi|342524011|gb|AFTD01110964.1|	12479	12403	-
F0ZWHJG01A0NBU	gi|342503401|gb|AFTD01131154.1|	56943	56990	+
F0ZWHJG01A0NHA	gi|342646440|gb|AFTD01002493.1|	60380	60682	+
F0ZWHJG01A0NOH	gi|342542165|gb|AFTD01092810.1|	46551	46845	+
F0ZWHJG01A0O0B	gi|342601697|gb|AFTD01047235.1|	11012	11341	+
F0ZWHJG01A0O2W	gi|342642285|gb|AFTD01006648.1|	15929	16301	+
F0ZWHJG01A0O51	gi|342594368|gb|AFTD01054564.1|	20422	20910	+
F0ZWHJG01A0OAE	gi|342608394|gb|AFTD01040538.1|	120402	120316	-
F0ZWHJG01A0OCN	gi|342600032|gb|AFTD01048900.1|	15262	14934	-
F0ZWHJG01A0OI8	gi|342603706|gb|AFTD01045226.1|	128017	128448	+
F0ZWHJG01A0OOT	gi|342557299|gb|AFTD01078153.1|	65862	65691	-
F0ZWHJG01A0OPT	gi|342370711|gb|AFTD01262827.1|	1275	1523	+
F0ZWHJG01A0OSP	gi|342476106|gb|AFTD01158365.1|	19110	19355	+
F0ZWHJG01A0PB7	gi|342499908|gb|AFTD01134563.1|	690	1004	+
F0ZWHJG01A0PHI	gi|342621458|gb|AFTD01027474.1|	11423	11812	+
F0ZWHJG01A0QCO	gi|342621825|gb|AFTD01027107.1|	58185	57807	-
F0ZWHJG01A0QHZ	gi|342485338|gb|AFTD01149133.1|	6742	7031	+
F0ZWHJG01A0QVJ	gi|342594144|gb|AFTD01054788.1|	2372	1972	-
F0ZWHJG01A0QYG	gi|342492713|gb|AFTD01141758.1|	12400	12049	-
F0ZWHJG01A0RDT	gi|342610169|gb|AFTD01038763.1|	6171	5991	-
F0ZWHJG01A0RN4	gi|342513516|gb|AFTD01121039.1|	42684	42319	-
F0ZWHJG01A0RTX	gi|342547930|gb|AFTD01087522.1|	69319	68867	-
F0ZWHJG01A0S9S	gi|342530023|gb|AFTD01104952.1|	41963	42306	+
F0ZWHJG01A0SB3	gi|342629352|gb|AFTD01019580.1|	80636	81073	+
F0ZWHJG01A0SF2	gi|342646418|gb|AFTD01002515.1|	41021	40715	-
F0ZWHJG01A0ST1	gi|342515780|gb|AFTD01118778.1|	1566	2010	+
F0ZWHJG01A0T44	gi|342511521|gb|AFTD01123034.1|	6721	7012	+
F0ZWHJG01A0T57	gi|342644445|gb|AFTD01004488.1|	97981	98036	+
F0ZWHJG01A0T8D	gi|342605007|gb|AFTD01043925.1|	18293	18217	-
F0ZWHJG01A0TCH	gi|342642213|gb|AFTD01006720.1|	760	1087	+
F0ZWHJG01A0TS1	gi|342480849|gb|AFTD01153622.1|	15658	15968	+
F0ZWHJG01A0TU8	gi|342565555|gb|AFTD01069897.1|	37580	37171	-
F0ZWHJG01A0U2B	gi|342541972|gb|AFTD01093003.1|	8839	9107	+
F0ZWHJG01A0U80	gi|342499840|gb|AFTD01134631.1|	36231	36664	+
F0ZWHJG01A0U9R	gi|342509146|gb|AFTD01125409.1|	7687	8013	+
F0ZWHJG01A0UX3	gi|342591468|gb|AFTD01056157.1|	48563	48857	+
F0ZWHJG01A0V2H	gi|342556563|gb|AFTD01078889.1|	48650	48839	+
F0ZWHJG01A0VC4	gi|342595787|gb|AFTD01053145.1|	10615	10503	-
F0ZWHJG01A0VID	gi|342643954|gb|AFTD01004979.1|	84765	84602	-
F0ZWHJG01A0VPF	gi|342617409|gb|AFTD01031523.1|	51427	51035	-
F0ZWHJG01A0WGQ	gi|342640950|gb|AFTD01007983.1|	88127	87820	-
F0ZWHJG01A0WHW	gi|342631015|gb|AFTD01017917.1|	31218	30828	-
F0ZWHJG01A0WYD	gi|342631489|gb|AFTD01017443.1|	3078	3312	+
F0ZWHJG01A0X8U	gi|342566823|gb|AFTD01068629.1|	7275	7344	+
F0ZWHJG01A0XS8	gi|342477801|gb|AFTD01156670.1|	3069	3320	+
F0ZWHJG01A0Y1I	gi|342638905|gb|AFTD01010028.1|	2297	2126	-
F0ZWHJG01A0Y5B	gi|342515705|gb|AFTD01118852.1|	6658	6877	+
F0ZWHJG01A0YO7	gi|342490708|gb|AFTD01143763.1|	11351	11230	-
F0ZWHJG01A0YQM	gi|342550029|gb|AFTD01085423.1|	18485	18133	-
F0ZWHJG01A0YXI	gi|342640950|gb|AFTD01007983.1|	88133	87784	-
F0ZWHJG01A0YY5	gi|342634069|gb|AFTD01014864.1|	2875	2493	-
F0ZWHJG01A0Z74	gi|342529147|gb|AFTD01105828.1|	41126	40865	-
F0ZWHJG01A0ZDM	gi|342645389|gb|AFTD01003544.1|	1034	869	-
F0ZWHJG01A0ZH7	gi|342603336|gb|AFTD01045596.1|	5124	4872	-
F0ZWHJG01A0ZQH	gi|342517791|gb|AFTD01116885.1|	45237	44949	-
F0ZWHJG01A107R	gi|342524773|gb|AFTD01110202.1|	2222	2711	+
F0ZWHJG01A10GT	gi|342600578|gb|AFTD01048354.1|	38717	39135	+
F0ZWHJG01A10T2	gi|342568739|gb|AFTD01066713.1|	3370	3747	+
F0ZWHJG01A10TI	gi|342585442|gb|AFTD01058280.1|	23588	23342	-
F0ZWHJG01A115S	gi|342528041|gb|AFTD01106934.1|	6382	6686	+
F0ZWHJG01A11JZ	gi|342517637|gb|AFTD01117039.1|	32906	33128	+
F0ZWHJG01A11YA	gi|342631068|gb|AFTD01017864.1|	6819	7179	+
F0ZWHJG01A125I	gi|342539063|gb|AFTD01095912.1|	89607	89547	-
F0ZWHJG01A12CW	gi|342367981|gb|AFTD01265557.1|	1231	910	-
F0ZWHJG01A12D8	gi|342577069|gb|AFTD01061095.1|	21871	21693	-
F0ZWHJG01A12DX	gi|342608785|gb|AFTD01040147.1|	22076	21704	-
F0ZWHJG01A12IY	gi|342548108|gb|AFTD01087344.1|	4298	4476	+
F0ZWHJG01A12Z2	gi|342501791|gb|AFTD01132680.1|	14043	13886	-
F0ZWHJG01A1379	gi|342520096|gb|AFTD01114828.1|	38118	37742	-
F0ZWHJG01A13PH	gi|342538685|gb|AFTD01096290.1|	12258	11952	-
F0ZWHJG01A13QL	gi|342637213|gb|AFTD01011720.1|	43980	44491	+
F0ZWHJG01A13UH	gi|342601805|gb|AFTD01047127.1|	2267	2655	+
F0ZWHJG01A14EX	gi|342520096|gb|AFTD01114828.1|	38153	37678	-
F0ZWHJG01A14TH	gi|342603050|gb|AFTD01045882.1|	12148	12514	+
F0ZWHJG01A1596	gi|342572710|gb|AFTD01062742.1|	2461	2553	+
F0ZWHJG01A15B9	gi|342642816|gb|AFTD01006117.1|	41511	41809	+
F0ZWHJG01A15RC	gi|342545492|gb|AFTD01089483.1|	2419	2053	-
F0ZWHJG01A1667	gi|342501868|gb|AFTD01132603.1|	3685	4109	+
F0ZWHJG01A17MS	gi|342627437|gb|AFTD01021495.1|	18059	17674	-
F0ZWHJG01A17P7	gi|342577657|gb|AFTD01060893.1|	1018	1095	+
F0ZWHJG01A17YH	gi|342513237|gb|AFTD01121318.1|	7967	8334	+
F0ZWHJG01A18NL	gi|342604980|gb|AFTD01043952.1|	29387	29004	-
F0ZWHJG01A196L	gi|342606080|gb|AFTD01042852.1|	7924	8345	+
F0ZWHJG01A19IN	gi|342620435|gb|AFTD01028497.1|	11947	12168	+
F0ZWHJG01A19MO	gi|342508764|gb|AFTD01125791.1|	2089	2325	+
F0ZWHJG01A19PI	gi|342627714|gb|AFTD01021218.1|	4932	4553	-
F0ZWHJG01A1A1P	gi|342564381|gb|AFTD01071071.1|	5866	5658	-
F0ZWHJG01A1A82	gi|342646173|gb|AFTD01002760.1|	6279	6417	+
F0ZWHJG01A1AEP	gi|342626980|gb|AFTD01021952.1|	6855	6705	-
F0ZWHJG01A1AI0	gi|342636113|gb|AFTD01012820.1|	13745	13352	-
F0ZWHJG01A1AU6	gi|342619354|gb|AFTD01029578.1|	28069	27672	-
F0ZWHJG01A1AVR	gi|342599052|gb|AFTD01049880.1|	26746	26950	+
F0ZWHJG01A1AYJ	gi|342515277|gb|AFTD01119278.1|	44238	44144	-
F0ZWHJG01A1AZ3	gi|342577885|gb|AFTD01060806.1|	6623	7054	+
F0ZWHJG01A1B1B	gi|342611058|gb|AFTD01037874.1|	30421	30718	+
F0ZWHJG01A1B9P	gi|342496184|gb|AFTD01138287.1|	4178	3749	-
F0ZWHJG01A1BI8	gi|342540152|gb|AFTD01094823.1|	11165	11448	+
F0ZWHJG01A1BT6	gi|342524205|gb|AFTD01110770.1|	61787	62182	+
F0ZWHJG01A1BU8	gi|342567189|gb|AFTD01068263.1|	3543	3094	-
F0ZWHJG01A1BUS	gi|342643494|gb|AFTD01005439.1|	67577	68041	+
F0ZWHJG01A1BVC	gi|342540559|gb|AFTD01094416.1|	46130	46535	+
F0ZWHJG01A1BWK	gi|342480849|gb|AFTD01153622.1|	15740	15985	+
F0ZWHJG01A1D2N	gi|342605793|gb|AFTD01043139.1|	4798	4362	-
F0ZWHJG01A1DA0	gi|342532688|gb|AFTD01102287.1|	10552	10696	+
F0ZWHJG01A1DKJ	gi|342495978|gb|AFTD01138493.1|	8402	8238	-
F0ZWHJG01A1DRT	gi|342478066|gb|AFTD01156405.1|	10894	11331	+
F0ZWHJG01A1DSF	gi|342369588|gb|AFTD01263950.1|	358	154	-
F0ZWHJG01A1E0R	gi|342520319|gb|AFTD01114611.1|	25051	25246	+
F0ZWHJG01A1E51	gi|342519949|gb|AFTD01114973.1|	51202	50712	-
F0ZWHJG01A1E7B	gi|342594619|gb|AFTD01054313.1|	18238	18673	+
F0ZWHJG01A1EC3	gi|342547778|gb|AFTD01087674.1|	18575	18659	+
F0ZWHJG01A1EEK	gi|342518618|gb|AFTD01116174.1|	33855	34120	+
F0ZWHJG01A1F3O	gi|342608448|gb|AFTD01040484.1|	2385	2722	+
F0ZWHJG01A1G1W	gi|342527215|gb|AFTD01107760.1|	30247	30637	+
F0ZWHJG01A1GC4	gi|342630548|gb|AFTD01018384.1|	33241	32864	-
F0ZWHJG01A1GET	gi|342544085|gb|AFTD01090890.1|	2681	2975	+
F0ZWHJG01A1GZM	gi|342490238|gb|AFTD01144233.1|	1179	1335	+
F0ZWHJG01A1H9X	gi|342646418|gb|AFTD01002515.1|	41021	40707	-
F0ZWHJG01A1HB8	gi|342631526|gb|AFTD01017406.1|	33279	32880	-
F0ZWHJG01A1HEY	gi|342599052|gb|AFTD01049880.1|	26616	27040	+
F0ZWHJG01A1HP0	gi|342483401|gb|AFTD01151070.1|	2903	2420	-
F0ZWHJG01A1HSZ	gi|342639818|gb|AFTD01009115.1|	18077	17685	-
F0ZWHJG01A1I01	gi|342565395|gb|AFTD01070057.1|	75344	74939	-
F0ZWHJG01A1I65	gi|342597061|gb|AFTD01051871.1|	10668	10265	-
F0ZWHJG01A1IB7	gi|342568739|gb|AFTD01066713.1|	2121	2559	+
F0ZWHJG01A1IP9	gi|342630626|gb|AFTD01018306.1|	61799	62204	+
F0ZWHJG01A1IRF	gi|342617331|gb|AFTD01031601.1|	60016	59790	-
F0ZWHJG01A1JHO	gi|342547637|gb|AFTD01087815.1|	7740	7579	-
F0ZWHJG01A1JIZ	gi|342640930|gb|AFTD01008003.1|	25396	25255	-
F0ZWHJG01A1JJE	gi|342568978|gb|AFTD01066474.1|	53761	53340	-
F0ZWHJG01A1JRL	gi|342593801|gb|AFTD01054994.1|	41014	40651	-
F0ZWHJG01A1K0D	gi|342509643|gb|AFTD01124912.1|	12205	12553	+
F0ZWHJG01A1KJD	gi|342488526|gb|AFTD01145945.1|	34853	34994	+
F0ZWHJG01A1KMT	gi|342558273|gb|AFTD01077179.1|	57445	57113	-
F0ZWHJG01A1KZ7	gi|342637088|gb|AFTD01011845.1|	1227	781	-
F0ZWHJG01A1L5K	gi|342599985|gb|AFTD01048947.1|	16311	16545	+
F0ZWHJG01A1L5R	gi|342549946|gb|AFTD01085506.1|	457	2	-
F0ZWHJG01A1LK3	gi|342623257|gb|AFTD01025675.1|	1838	2079	+
F0ZWHJG01A1LPS	gi|342622981|gb|AFTD01025951.1|	368480	368141	-
F0ZWHJG01A1LUL	gi|342383945|gb|AFTD01249595.1|	131	562	+
F0ZWHJG01A1M6Q	gi|342638899|gb|AFTD01010034.1|	41178	41556	+
F0ZWHJG01A1MEX	gi|342594678|gb|AFTD01054254.1|	25965	26430	+
F0ZWHJG01A1MI6	gi|342487167|gb|AFTD01147304.1|	1788	1397	-
F0ZWHJG01A1MIR	gi|342614575|gb|AFTD01034357.1|	19755	19412	-
F0ZWHJG01A1MYN	gi|342495978|gb|AFTD01138493.1|	8486	8436	-
F0ZWHJG01A1N43	gi|342547943|gb|AFTD01087509.1|	11754	11470	-
F0ZWHJG01A1NHF	gi|342637536|gb|AFTD01011397.1|	9140	9076	-
F0ZWHJG01A1O42	gi|342539695|gb|AFTD01095280.1|	29283	28824	-
F0ZWHJG01A1ORZ	gi|342503477|gb|AFTD01131078.1|	11759	11433	-
F0ZWHJG01A1OVR	gi|342407739|gb|AFTD01226634.1|	129	183	+
F0ZWHJG01A1P9J	gi|342491977|gb|AFTD01142494.1|	13679	13277	-
F0ZWHJG01A1PLC	gi|342526127|gb|AFTD01108848.1|	39291	38906	-
F0ZWHJG01A1PW1	gi|342547693|gb|AFTD01087759.1|	31447	31137	-
F0ZWHJG01A1QE6	gi|342528906|gb|AFTD01106069.1|	26361	26861	+
F0ZWHJG01A1R1R	gi|342531202|gb|AFTD01103773.1|	30866	30532	-
F0ZWHJG01A1S0V	gi|342514338|gb|AFTD01120217.1|	1983	1578	-
F0ZWHJG01A1S94	gi|342561841|gb|AFTD01073611.1|	2102	2004	-
F0ZWHJG01A1SSJ	gi|342528925|gb|AFTD01106050.1|	12727	13142	+
F0ZWHJG01A1SSX	gi|342593578|gb|AFTD01055106.1|	7035	6842	-
F0ZWHJG01A1SZ4	gi|342633319|gb|AFTD01015614.1|	10088	10166	+
F0ZWHJG01A1SZD	gi|342551152|gb|AFTD01084300.1|	264	599	+
F0ZWHJG01A1T6N	gi|342576448|gb|AFTD01061301.1|	15271	15216	-
F0ZWHJG01A1TF8	gi|342548325|gb|AFTD01087127.1|	4303	4640	+
F0ZWHJG01A1THZ	gi|342538685|gb|AFTD01096290.1|	13837	13695	-
F0ZWHJG01A1TUH	gi|342489847|gb|AFTD01144624.1|	73138	73450	+
F0ZWHJG01A1TYX	gi|342491474|gb|AFTD01142997.1|	6606	6732	+
F0ZWHJG01A1U0D	gi|342645878|gb|AFTD01003055.1|	37561	37713	+
F0ZWHJG01A1UAI	gi|342646255|gb|AFTD01002678.1|	25094	24702	-
F0ZWHJG01A1UBV	gi|342540642|gb|AFTD01094333.1|	8366	8500	+
F0ZWHJG01A1UJ3	gi|342558322|gb|AFTD01077130.1|	36751	36603	-
F0ZWHJG01A1ULZ	gi|342616434|gb|AFTD01032498.1|	17426	17687	+
F0ZWHJG01A1UPZ	gi|342623476|gb|AFTD01025456.1|	8297	7971	-
F0ZWHJG01A1VRQ	gi|342517791|gb|AFTD01116885.1|	53243	52819	-
F0ZWHJG01A1VU6	gi|342642587|gb|AFTD01006346.1|	11040	11442	+
F0ZWHJG01A1VZ2	gi|342643226|gb|AFTD01005707.1|	26419	26112	-
F0ZWHJG01A1W0U	gi|342485373|gb|AFTD01149098.1|	17005	17401	+
F0ZWHJG01A1W3Q	gi|342559881|gb|AFTD01075571.1|	4076	3923	-
F0ZWHJG01A1WAU	gi|342576853|gb|AFTD01061167.1|	5599	5354	-
F0ZWHJG01A1WE7	gi|342609802|gb|AFTD01039130.1|	13238	13003	-
F0ZWHJG01A1WF3	gi|342629010|gb|AFTD01019922.1|	17861	18218	+
F0ZWHJG01A1WUD	gi|342591861|gb|AFTD01055964.1|	44383	44013	-
F0ZWHJG01A1X0M	gi|342575869|gb|AFTD01061494.1|	37524	37715	+
F0ZWHJG01A1XRY	gi|342617817|gb|AFTD01031115.1|	14750	15119	+
F0ZWHJG01A1XWR	gi|342624591|gb|AFTD01024341.1|	6363	5879	-
F0ZWHJG01A1Y5D	gi|342630080|gb|AFTD01018852.1|	34034	34104	+
F0ZWHJG01A1YE6	gi|342645306|gb|AFTD01003627.1|	1362	1005	-
F0ZWHJG01A1YQ2	gi|342528444|gb|AFTD01106531.1|	72413	72902	+
F0ZWHJG01A1Z04	gi|342640914|gb|AFTD01008019.1|	248	545	+
F0ZWHJG01A1ZC1	gi|342630843|gb|AFTD01018089.1|	39085	38930	-
F0ZWHJG01A1ZDM	gi|342566823|gb|AFTD01068629.1|	7531	7771	+
F0ZWHJG01A1ZEQ	gi|342506865|gb|AFTD01127690.1|	78222	78691	+
F0ZWHJG01A1ZHY	gi|342525147|gb|AFTD01109828.1|	157433	157069	-
F0ZWHJG01A20D7	gi|342618800|gb|AFTD01030132.1|	2508	2185	-
F0ZWHJG01A20E3	gi|342640950|gb|AFTD01007983.1|	88094	87820	-
F0ZWHJG01A20JN	gi|342596328|gb|AFTD01052604.1|	7528	7885	+
F0ZWHJG01A21CB	gi|342513054|gb|AFTD01121501.1|	5641	5197	-
F0ZWHJG01A21MA	gi|342476843|gb|AFTD01157628.1|	17097	17215	+
F0ZWHJG01A235S	gi|342544373|gb|AFTD01090602.1|	5452	5850	+
F0ZWHJG01A23CE	gi|342526214|gb|AFTD01108761.1|	36705	36213	-
F0ZWHJG01A23DR	gi|342528517|gb|AFTD01106458.1|	56352	56731	+
F0ZWHJG01A23E1	gi|342563305|gb|AFTD01072147.1|	46545	46932	+
F0ZWHJG01A23KT	gi|342568894|gb|AFTD01066558.1|	23452	23828	+
F0ZWHJG01A2402	gi|342540510|gb|AFTD01094465.1|	41204	41336	+
F0ZWHJG01A242F	gi|342631522|gb|AFTD01017410.1|	39255	39334	+
F0ZWHJG01A24I5	gi|342640869|gb|AFTD01008064.1|	57938	58252	+
F0ZWHJG01A24K7	gi|342540342|gb|AFTD01094633.1|	38236	37896	-
F0ZWHJG01A24U1	gi|342536888|gb|AFTD01098087.1|	78062	77640	-
F0ZWHJG01A24ZN	gi|342512819|gb|AFTD01121736.1|	6303	5922	-
F0ZWHJG01A25B5	gi|342633162|gb|AFTD01015771.1|	25043	24586	-
F0ZWHJG01A25IW	gi|342569024|gb|AFTD01066428.1|	30856	30529	-
F0ZWHJG01A25MV	gi|342556211|gb|AFTD01079241.1|	23462	23352	-
F0ZWHJG01A261Y	gi|342499874|gb|AFTD01134597.1|	3887	4138	+
F0ZWHJG01A266E	gi|342559112|gb|AFTD01076340.1|	11833	11894	+
F0ZWHJG01A26MN	gi|342616612|gb|AFTD01032320.1|	6403	6034	-
F0ZWHJG01A26OE	gi|342556858|gb|AFTD01078594.1|	23599	23337	-
F0ZWHJG01A2718	gi|342529917|gb|AFTD01105058.1|	35299	35593	+
F0ZWHJG01A274K	gi|342502257|gb|AFTD01132214.1|	3961	3824	-
F0ZWHJG01A276H	gi|342511265|gb|AFTD01123290.1|	46567	46478	-
F0ZWHJG01A27KC	gi|342504673|gb|AFTD01129882.1|	42662	42512	-
F0ZWHJG01A27QX	gi|342530596|gb|AFTD01104379.1|	10647	10711	+
F0ZWHJG01A27XS	gi|342515437|gb|AFTD01119118.1|	251522	251313	-
F0ZWHJG01A28JW	gi|342571980|gb|AFTD01063472.1|	675	724	+
F0ZWHJG01A28S3	gi|342509646|gb|AFTD01124909.1|	36169	36476	+
F0ZWHJG01A291P	gi|342600333|gb|AFTD01048599.1|	3468	3093	-
F0ZWHJG01A29CP	gi|342594453|gb|AFTD01054479.1|	37377	37013	-
F0ZWHJG01A29P7	gi|342630245|gb|AFTD01018687.1|	12206	12658	+
F0ZWHJG01A2AQ4	gi|342489271|gb|AFTD01145200.1|	42802	42403	-
F0ZWHJG01A2AWX	gi|342608733|gb|AFTD01040199.1|	27066	27460	+
F0ZWHJG01A2B3A	gi|342549940|gb|AFTD01085512.1|	14493	14871	+
F0ZWHJG01A2BCC	gi|342516591|gb|AFTD01118023.1|	79136	79565	+
F0ZWHJG01A2BIW	gi|342480347|gb|AFTD01154124.1|	7370	7737	+
F0ZWHJG01A2BRN	gi|342600167|gb|AFTD01048765.1|	7784	7444	-
F0ZWHJG01A2BWY	gi|342601711|gb|AFTD01047221.1|	27534	27475	-
F0ZWHJG01A2C3G	gi|342549939|gb|AFTD01085513.1|	39637	39198	-
F0ZWHJG01A2C66	gi|342605235|gb|AFTD01043697.1|	9060	9439	+
F0ZWHJG01A2CME	gi|342602286|gb|AFTD01046646.1|	5995	5613	-
F0ZWHJG01A2D4R	gi|342548468|gb|AFTD01086984.1|	4686	4187	-
F0ZWHJG01A2D8C	gi|342620965|gb|AFTD01027967.1|	11193	11510	+
F0ZWHJG01A2E13	gi|342613259|gb|AFTD01035673.1|	8250	7842	-
F0ZWHJG01A2EID	gi|342590886|gb|AFTD01056431.1|	42984	42616	-
F0ZWHJG01A2ENJ	gi|342634389|gb|AFTD01014544.1|	4669	5060	+
F0ZWHJG01A2ERU	gi|342610456|gb|AFTD01038476.1|	3735	3515	-
F0ZWHJG01A2F2I	gi|342566823|gb|AFTD01068629.1|	7441	7769	+
F0ZWHJG01A2F3A	gi|342636417|gb|AFTD01012516.1|	7513	7641	+
F0ZWHJG01A2F3H	gi|342545301|gb|AFTD01089674.1|	2722	2794	+
F0ZWHJG01A2F49	gi|342607025|gb|AFTD01041907.1|	1353	1431	+
F0ZWHJG01A2F7D	gi|342554521|gb|AFTD01080931.1|	1046	534	-
F0ZWHJG01A2FW1	gi|342497362|gb|AFTD01137109.1|	2363	2743	+
F0ZWHJG01A2FW4	gi|342514541|gb|AFTD01120014.1|	23615	23951	+
F0ZWHJG01A2GER	gi|342591390|gb|AFTD01056196.1|	11573	11863	+
F0ZWHJG01A2GL3	gi|342562914|gb|AFTD01072538.1|	16029	15625	-
F0ZWHJG01A2GPU	gi|342634046|gb|AFTD01014887.1|	36685	36578	-
F0ZWHJG01A2H85	gi|342598454|gb|AFTD01050478.1|	49246	49195	-
F0ZWHJG01A2HUD	gi|342630469|gb|AFTD01018463.1|	10176	10607	+
F0ZWHJG01A2HXZ	gi|342515568|gb|AFTD01118989.1|	5918	5514	-
F0ZWHJG01A2HZT	gi|342564917|gb|AFTD01070535.1|	26640	26202	-
F0ZWHJG01A2IV3	gi|342600533|gb|AFTD01048399.1|	19406	19574	+
F0ZWHJG01A2JAG	gi|342544135|gb|AFTD01090840.1|	10719	11076	+
F0ZWHJG01A2JFC	gi|342572710|gb|AFTD01062742.1|	2474	2547	+
F0ZWHJG01A2JOG	gi|342525637|gb|AFTD01109338.1|	7025	7423	+
F0ZWHJG01A2JRE	gi|342496953|gb|AFTD01137518.1|	17090	17526	+
F0ZWHJG01A2JWP	gi|342634412|gb|AFTD01014521.1|	30192	29761	-
F0ZWHJG01A2K3P	gi|342493255|gb|AFTD01141216.1|	24779	24955	+
F0ZWHJG01A2K42	gi|342615651|gb|AFTD01033281.1|	9719	9619	-
F0ZWHJG01A2K73	gi|342531411|gb|AFTD01103564.1|	16377	15941	-
F0ZWHJG01A2L3C	gi|342566748|gb|AFTD01068704.1|	161916	162343	+
F0ZWHJG01A2LTQ	gi|342564447|gb|AFTD01071005.1|	105482	105329	-
F0ZWHJG01A2MLG	gi|342528926|gb|AFTD01106049.1|	27214	27509	+
F0ZWHJG01A2MN1	gi|342532655|gb|AFTD01102320.1|	43489	43138	-
F0ZWHJG01A2N5T	gi|342520061|gb|AFTD01114863.1|	11869	12083	+
F0ZWHJG01A2NIJ	gi|342561297|gb|AFTD01074155.1|	6101	6037	-
F0ZWHJG01A2NYO	gi|342505085|gb|AFTD01129470.1|	18612	18675	+
F0ZWHJG01A2O05	gi|342519650|gb|AFTD01115270.1|	5603	5668	+
F0ZWHJG01A2OCS	gi|342640155|gb|AFTD01008778.1|	15757	15409	-
F0ZWHJG01A2OD8	gi|342618380|gb|AFTD01030552.1|	45875	46323	+
F0ZWHJG01A2OEP	gi|342506699|gb|AFTD01127856.1|	21214	21094	-
F0ZWHJG01A2OGX	gi|342488526|gb|AFTD01145945.1|	34454	34583	+
F0ZWHJG01A2OOM	gi|342564005|gb|AFTD01071447.1|	44093	44539	+
F0ZWHJG01A2OQN	gi|342514418|gb|AFTD01120137.1|	21078	21227	+
F0ZWHJG01A2PFT	gi|342596648|gb|AFTD01052284.1|	31390	31337	-
F0ZWHJG01A2PHS	gi|342567347|gb|AFTD01068105.1|	1194	764	-
F0ZWHJG01A2PUS	gi|342638124|gb|AFTD01010809.1|	36376	36609	+
F0ZWHJG01A2PVY	gi|342562447|gb|AFTD01073005.1|	10759	10565	-
F0ZWHJG01A2Q6Q	gi|342591438|gb|AFTD01056172.1|	6828	7214	+
F0ZWHJG01A2QM3	gi|342621836|gb|AFTD01027096.1|	94397	94077	-
F0ZWHJG01A2QPU	gi|342562659|gb|AFTD01072793.1|	7173	7387	+
F0ZWHJG01A2QU1	gi|342474482|gb|AFTD01159989.1|	1891	1440	-
F0ZWHJG01A2RN4	gi|342554694|gb|AFTD01080758.1|	9082	8724	-
F0ZWHJG01A2RY4	gi|342478711|gb|AFTD01155760.1|	27662	27332	-
F0ZWHJG01A2SMR	gi|342623069|gb|AFTD01025863.1|	10647	11019	+
F0ZWHJG01A2SUC	gi|342592298|gb|AFTD01055746.1|	94860	95087	+
F0ZWHJG01A2T21	gi|342556258|gb|AFTD01079194.1|	23933	23567	-
F0ZWHJG01A2T3N	gi|342526617|gb|AFTD01108358.1|	18709	19175	+
F0ZWHJG01A2TBF	gi|342559849|gb|AFTD01075603.1|	12797	13204	+
F0ZWHJG01A2TVK	gi|342615823|gb|AFTD01033109.1|	27971	28226	+
F0ZWHJG01A2TZF	gi|342630580|gb|AFTD01018352.1|	70403	70089	-
F0ZWHJG01A2UIY	gi|342528817|gb|AFTD01106158.1|	18468	18894	+
F0ZWHJG01A2ULE	gi|342646162|gb|AFTD01002771.1|	16065	15887	-
F0ZWHJG01A2UZZ	gi|342497182|gb|AFTD01137289.1|	28492	28169	-
F0ZWHJG01A2VBT	gi|342616257|gb|AFTD01032675.1|	60496	60588	+
F0ZWHJG01A2VON	gi|342611094|gb|AFTD01037838.1|	3642	3295	-
F0ZWHJG01A2VPA	gi|342535604|gb|AFTD01099371.1|	30761	30915	+
F0ZWHJG01A2WBR	gi|342521560|gb|AFTD01113415.1|	24662	24581	-
F0ZWHJG01A2WM3	gi|342627679|gb|AFTD01021253.1|	2405	2567	+
F0ZWHJG01A2X9S	gi|342625066|gb|AFTD01023866.1|	30571	30649	+
F0ZWHJG01A2XG9	gi|342613113|gb|AFTD01035819.1|	15822	15660	-
F0ZWHJG01A2XGB	gi|342516491|gb|AFTD01118085.1|	45567	45872	+
F0ZWHJG01A2XIA	gi|342613892|gb|AFTD01035040.1|	254	608	+
F0ZWHJG01A2XQM	gi|342605584|gb|AFTD01043348.1|	10000	10379	+
F0ZWHJG01A2XVI	gi|342529487|gb|AFTD01105488.1|	6800	7300	+
F0ZWHJG01A2YB1	gi|342521264|gb|AFTD01113703.1|	12778	12469	-
F0ZWHJG01A2YCZ	gi|342488115|gb|AFTD01146356.1|	6774	7002	+
F0ZWHJG01A2YH5	gi|342624512|gb|AFTD01024420.1|	5373	5667	+
F0ZWHJG01A2YPO	gi|342535478|gb|AFTD01099497.1|	26703	26346	-
F0ZWHJG01A2ZCI	gi|342555325|gb|AFTD01080127.1|	6558	6275	-
F0ZWHJG01A2ZHV	gi|342587393|gb|AFTD01057623.1|	11573	11262	-
F0ZWHJG01A2ZM7	gi|342508110|gb|AFTD01126445.1|	10880	10527	-
F0ZWHJG01A2ZQI	gi|342647953|gb|AFTD01000980.1|	11470	11775	+
F0ZWHJG01A301D	gi|342603715|gb|AFTD01045217.1|	3636	3972	+
F0ZWHJG01A301Z	gi|342548912|gb|AFTD01086540.1|	6230	5877	-
F0ZWHJG01A309X	gi|342621830|gb|AFTD01027102.1|	75183	75095	-
F0ZWHJG01A312B	gi|342643133|gb|AFTD01005800.1|	7183	7622	+
F0ZWHJG01A31AN	gi|342547766|gb|AFTD01087686.1|	7519	7255	-
F0ZWHJG01A31DT	gi|342517791|gb|AFTD01116885.1|	37173	37242	+
F0ZWHJG01A31IE	gi|342576120|gb|AFTD01061410.1|	31692	31780	+
F0ZWHJG01A3298	gi|342503134|gb|AFTD01131421.1|	42330	41956	-
F0ZWHJG01A32ES	gi|342528925|gb|AFTD01106050.1|	20673	20987	+
F0ZWHJG01A32OV	gi|342496091|gb|AFTD01138380.1|	27622	27923	+
F0ZWHJG01A32PI	gi|342622988|gb|AFTD01025944.1|	50366	50738	+
F0ZWHJG01A337X	gi|342523553|gb|AFTD01111422.1|	6769	6435	-
F0ZWHJG01A33MC	gi|342643749|gb|AFTD01005184.1|	4763	4619	-
F0ZWHJG01A33V3	gi|342520784|gb|AFTD01114156.1|	10528	10649	+
F0ZWHJG01A33XY	gi|342494532|gb|AFTD01139939.1|	16955	17123	+
F0ZWHJG01A33YZ	gi|342502319|gb|AFTD01132152.1|	4233	4158	-
F0ZWHJG01A340K	gi|342487135|gb|AFTD01147336.1|	33543	33895	+
F0ZWHJG01A35PC	gi|342542445|gb|AFTD01092530.1|	35117	34763	-
F0ZWHJG01A35QU	gi|342561843|gb|AFTD01073609.1|	14368	14681	+
F0ZWHJG01A35WB	gi|342646994|gb|AFTD01001939.1|	40672	40393	-
F0ZWHJG01A35ZX	gi|342540563|gb|AFTD01094412.1|	24630	24978	+
F0ZWHJG01A36H9	gi|342571305|gb|AFTD01064147.1|	14390	14050	-
F0ZWHJG01A36WN	gi|342596581|gb|AFTD01052351.1|	28232	27917	-
F0ZWHJG01A36X3	gi|342521808|gb|AFTD01113167.1|	52147	52083	-
F0ZWHJG01A378W	gi|342624566|gb|AFTD01024366.1|	16413	15926	-
F0ZWHJG01A37FB	gi|342603706|gb|AFTD01045226.1|	128017	128072	+
F0ZWHJG01A3849	gi|342527214|gb|AFTD01107761.1|	24238	24582	+
F0ZWHJG01A38DV	gi|342519036|gb|AFTD01115762.1|	764	919	+
F0ZWHJG01A38F4	gi|342597037|gb|AFTD01051895.1|	7096	6686	-
F0ZWHJG01A38FX	gi|342581896|gb|AFTD01059464.1|	3039	3140	+
F0ZWHJG01A38KU	gi|342641498|gb|AFTD01007435.1|	59241	59522	+
F0ZWHJG01A38N3	gi|342612839|gb|AFTD01036093.1|	2641	2736	+
F0ZWHJG01A38X8	gi|342632767|gb|AFTD01016166.1|	55316	55003	-
F0ZWHJG01A38Y9	gi|342595676|gb|AFTD01053256.1|	24906	25285	+
F0ZWHJG01A392H	gi|342547323|gb|AFTD01088129.1|	29537	29198	-
F0ZWHJG01A398B	gi|342621600|gb|AFTD01027332.1|	63076	63483	+
F0ZWHJG01A399F	gi|342552638|gb|AFTD01082814.1|	33209	33119	-
F0ZWHJG01A39F0	gi|342633504|gb|AFTD01015429.1|	30253	30633	+
F0ZWHJG01A39GG	gi|342577086|gb|AFTD01061089.1|	11266	11052	-
F0ZWHJG01A3A1K	gi|342544960|gb|AFTD01090015.1|	15355	15225	-
F0ZWHJG01A3A5K	gi|342539654|gb|AFTD01095321.1|	2586	2993	+
F0ZWHJG01A3AE4	gi|342544761|gb|AFTD01090214.1|	28536	28924	+
F0ZWHJG01A3AGX	gi|342571974|gb|AFTD01063478.1|	48806	48528	-
F0ZWHJG01A3AQD	gi|342603324|gb|AFTD01045608.1|	38091	38456	+
F0ZWHJG01A3B07	gi|342624976|gb|AFTD01023956.1|	39763	40213	+
F0ZWHJG01A3B6X	gi|342368457|gb|AFTD01265081.1|	710	314	-
F0ZWHJG01A3C7B	gi|342646169|gb|AFTD01002764.1|	5501	5124	-
F0ZWHJG01A3CH8	gi|342600012|gb|AFTD01048920.1|	48783	48496	-
F0ZWHJG01A3CV3	gi|342539719|gb|AFTD01095256.1|	3850	3558	-
F0ZWHJG01A3D1B	gi|342610456|gb|AFTD01038476.1|	3616	3181	-
F0ZWHJG01A3DDZ	gi|342544465|gb|AFTD01090510.1|	5316	4831	-
F0ZWHJG01A3DZA	gi|342464571|gb|AFTD01169802.1|	4509	4232	-
F0ZWHJG01A3E7O	gi|342530230|gb|AFTD01104745.1|	17472	17092	-
F0ZWHJG01A3E96	gi|342421485|gb|AFTD01212888.1|	26	174	+
F0ZWHJG01A3EG3	gi|342594779|gb|AFTD01054153.1|	61302	61215	-
F0ZWHJG01A3EPW	gi|342534618|gb|AFTD01100357.1|	22794	22910	+
F0ZWHJG01A3F8Y	gi|342633345|gb|AFTD01015588.1|	11797	11334	-
F0ZWHJG01A3G1B	gi|342626937|gb|AFTD01021995.1|	10524	10960	+
F0ZWHJG01A3G47	gi|342644341|gb|AFTD01004592.1|	23177	22820	-
F0ZWHJG01A3G8D	gi|342609068|gb|AFTD01039864.1|	8990	8780	-
F0ZWHJG01A3GAF	gi|342503417|gb|AFTD01131138.1|	4428	4840	+
F0ZWHJG01A3GKW	gi|342515080|gb|AFTD01119475.1|	44038	44299	+
F0ZWHJG01A3GPY	gi|342490690|gb|AFTD01143781.1|	12236	12402	+
F0ZWHJG01A3GWR	gi|342642710|gb|AFTD01006223.1|	17434	17192	-
F0ZWHJG01A3H39	gi|342518921|gb|AFTD01115875.1|	109155	109626	+
F0ZWHJG01A3HE6	gi|342623476|gb|AFTD01025456.1|	8297	7971	-
F0ZWHJG01A3IDA	gi|342597680|gb|AFTD01051252.1|	47769	47331	-
F0ZWHJG01A3II1	gi|342533880|gb|AFTD01101095.1|	14744	14807	+
F0ZWHJG01A3J1D	gi|342556935|gb|AFTD01078517.1|	10776	10333	-
F0ZWHJG01A3J1G	gi|342648636|gb|AFTD01000491.1|	2	333	+
F0ZWHJG01A3J7G	gi|342626091|gb|AFTD01022841.1|	13445	13558	+
F0ZWHJG01A3JIN	gi|342529575|gb|AFTD01105400.1|	13771	14061	+
F0ZWHJG01A3JLX	gi|342619299|gb|AFTD01029633.1|	7467	7071	-
F0ZWHJG01A3JP8	gi|342545908|gb|AFTD01089067.1|	14485	14622	+
F0ZWHJG01A3JTJ	gi|342507328|gb|AFTD01127227.1|	11103	10758	-
F0ZWHJG01A3KX7	gi|342618311|gb|AFTD01030621.1|	49597	49735	+
F0ZWHJG01A3L09	gi|342597880|gb|AFTD01051052.1|	18746	19223	+
F0ZWHJG01A3L3N	gi|342641961|gb|AFTD01006972.1|	56709	56619	-
F0ZWHJG01A3L6X	gi|342600770|gb|AFTD01048162.1|	23137	23034	-
F0ZWHJG01A3LZX	gi|342499479|gb|AFTD01134992.1|	32181	31823	-
F0ZWHJG01A3M2P	gi|342616361|gb|AFTD01032571.1|	40409	40079	-
F0ZWHJG01A3M5W	gi|342635571|gb|AFTD01013362.1|	57447	57063	-
F0ZWHJG01A3MDR	gi|342566981|gb|AFTD01068471.1|	51656	51169	-
F0ZWHJG01A3MVU	gi|342547736|gb|AFTD01087716.1|	12179	11851	-
F0ZWHJG01A3N6D	gi|342597322|gb|AFTD01051610.1|	19570	19198	-
F0ZWHJG01A3N8H	gi|342533915|gb|AFTD01101060.1|	5857	6233	+
F0ZWHJG01A3NZL	gi|342584071|gb|AFTD01058738.1|	118458	118104	-
F0ZWHJG01A3O0S	gi|342599523|gb|AFTD01049409.1|	57598	57320	-
F0ZWHJG01A3O56	gi|342623442|gb|AFTD01025490.1|	3256	3455	+
F0ZWHJG01A3O8X	gi|342596827|gb|AFTD01052105.1|	3240	2884	-
F0ZWHJG01A3OIC	gi|342560339|gb|AFTD01075113.1|	66233	65827	-
F0ZWHJG01A3P1J	gi|342636357|gb|AFTD01012576.1|	23376	22943	-
F0ZWHJG01A3PG0	gi|342645334|gb|AFTD01003599.1|	84384	83905	-
F0ZWHJG01A3PHP	gi|342570793|gb|AFTD01064659.1|	38018	38479	+
F0ZWHJG01A3PO9	gi|342598456|gb|AFTD01050476.1|	23594	23408	-
F0ZWHJG01A3QLR	gi|342622975|gb|AFTD01025957.1|	929	857	-
F0ZWHJG01A3R2E	gi|342599851|gb|AFTD01049081.1|	4813	4466	-
F0ZWHJG01A3R2X	gi|342529402|gb|AFTD01105573.1|	13199	13403	+
F0ZWHJG01A3RS0	gi|342616302|gb|AFTD01032630.1|	5916	6151	+
F0ZWHJG01A3S6Z	gi|342614381|gb|AFTD01034551.1|	50159	49718	-
F0ZWHJG01A3S9E	gi|342517798|gb|AFTD01116878.1|	90284	89903	-
F0ZWHJG01A3SFT	gi|342622975|gb|AFTD01025957.1|	1026	891	-
F0ZWHJG01A3SJO	gi|342538464|gb|AFTD01096511.1|	5865	6280	+
F0ZWHJG01A3TEU	gi|342563661|gb|AFTD01071791.1|	341	667	+
F0ZWHJG01A3TKA	gi|342483531|gb|AFTD01150940.1|	47589	47271	-
F0ZWHJG01A3TPS	gi|342527661|gb|AFTD01107314.1|	92654	92215	-
F0ZWHJG01A3UCG	gi|342481725|gb|AFTD01152746.1|	4742	4268	-
F0ZWHJG01A3UK0	gi|342595958|gb|AFTD01052974.1|	22528	22318	-
F0ZWHJG01A3UPN	gi|342572741|gb|AFTD01062711.1|	583	160	-
F0ZWHJG01A3VFU	gi|342591436|gb|AFTD01056173.1|	5003	4552	-
F0ZWHJG01A3VN8	gi|342507721|gb|AFTD01126834.1|	1260	1408	+
F0ZWHJG01A3VRG	gi|342568747|gb|AFTD01066705.1|	53577	53219	-
F0ZWHJG01A3VRU	gi|342568740|gb|AFTD01066712.1|	19196	19386	+
F0ZWHJG01A3W7X	gi|342521805|gb|AFTD01113170.1|	25602	25862	+
F0ZWHJG01A3WDL	gi|342610513|gb|AFTD01038419.1|	40952	40748	-
F0ZWHJG01A3WEF	gi|342533421|gb|AFTD01101554.1|	61878	62337	+
F0ZWHJG01A3WN3	gi|342645454|gb|AFTD01003479.1|	82100	82466	+
F0ZWHJG01A3WTP	gi|342596824|gb|AFTD01052108.1|	13734	13599	-
F0ZWHJG01A3X3P	gi|342626489|gb|AFTD01022443.1|	20321	20464	+
F0ZWHJG01A3XOB	gi|342628056|gb|AFTD01020876.1|	46221	45899	-
F0ZWHJG01A3XRC	gi|342526558|gb|AFTD01108417.1|	5838	5643	-
F0ZWHJG01A3XSV	gi|342608055|gb|AFTD01040877.1|	8261	8648	+
F0ZWHJG01A3XUK	gi|342607767|gb|AFTD01041165.1|	1481	1955	+
F0ZWHJG01A3XZF	gi|342499840|gb|AFTD01134631.1|	36424	36845	+
F0ZWHJG01A3Y3V	gi|342592237|gb|AFTD01055776.1|	10896	10666	-
F0ZWHJG01A3YEQ	gi|342610589|gb|AFTD01038343.1|	84814	84649	-
F0ZWHJG01A3YOI	gi|342516599|gb|AFTD01118015.1|	10710	11058	+
F0ZWHJG01A3Z02	gi|342629370|gb|AFTD01019562.1|	15146	14842	-
F0ZWHJG01A3Z6X	gi|342605233|gb|AFTD01043699.1|	5042	4664	-
F0ZWHJG01A3ZJK	gi|342616363|gb|AFTD01032569.1|	5481	5391	-
F0ZWHJG01A3ZKR	gi|342501435|gb|AFTD01133036.1|	25728	25401	-
F0ZWHJG01A3ZN9	gi|342373022|gb|AFTD01260516.1|	132	305	+
F0ZWHJG01A3ZVQ	gi|342601643|gb|AFTD01047289.1|	40393	40774	+
F0ZWHJG01A3ZYX	gi|342575503|gb|AFTD01061632.1|	6528	6113	-
F0ZWHJG01A4022	gi|342648180|gb|AFTD01000753.1|	4068	4476	+
F0ZWHJG01A402E	gi|342643902|gb|AFTD01005031.1|	17159	17023	-
F0ZWHJG01A40BW	gi|342611517|gb|AFTD01037415.1|	28965	29126	+
F0ZWHJG01A40DX	gi|342488510|gb|AFTD01145961.1|	16911	16573	-
F0ZWHJG01A40X8	gi|342618594|gb|AFTD01030338.1|	16457	16282	-
F0ZWHJG01A419Z	gi|342560284|gb|AFTD01075168.1|	1965	2313	+
F0ZWHJG01A41EQ	gi|342599993|gb|AFTD01048939.1|	75300	74940	-
F0ZWHJG01A41PY	gi|342601881|gb|AFTD01047051.1|	50443	50161	-
F0ZWHJG01A41QV	gi|342613977|gb|AFTD01034955.1|	10343	9981	-
F0ZWHJG01A4214	gi|342526988|gb|AFTD01107987.1|	743	1049	+
F0ZWHJG01A43FI	gi|342538685|gb|AFTD01096290.1|	47508	47449	-
F0ZWHJG01A44DA	gi|342503125|gb|AFTD01131430.1|	9954	9507	-
F0ZWHJG01A44GI	gi|342507721|gb|AFTD01126834.1|	168	570	+
F0ZWHJG01A44SL	gi|342558786|gb|AFTD01076666.1|	9912	10394	+
F0ZWHJG01A44X8	gi|342559144|gb|AFTD01076308.1|	12359	12740	+
F0ZWHJG01A4519	gi|342635030|gb|AFTD01013903.1|	8611	8284	-
F0ZWHJG01A457K	gi|342622558|gb|AFTD01026374.1|	2491	2544	+
F0ZWHJG01A45AU	gi|342505737|gb|AFTD01128818.1|	7904	8116	+
F0ZWHJG01A45QS	gi|342640950|gb|AFTD01007983.1|	88100	87763	-
F0ZWHJG01A465W	gi|342566136|gb|AFTD01069316.1|	54959	54615	-
F0ZWHJG01A46F5	gi|342559881|gb|AFTD01075571.1|	4083	3955	-
F0ZWHJG01A4710	gi|342543835|gb|AFTD01091140.1|	25725	25286	-
F0ZWHJG01A476O	gi|342645573|gb|AFTD01003360.1|	20411	20784	+
F0ZWHJG01A47GB	gi|342625787|gb|AFTD01023145.1|	34861	34418	-
F0ZWHJG01A47PZ	gi|342543272|gb|AFTD01091703.1|	12025	12198	+
F0ZWHJG01A47VE	gi|342594453|gb|AFTD01054479.1|	37377	36984	-
F0ZWHJG01A47ZJ	gi|342623257|gb|AFTD01025675.1|	1768	2080	+
F0ZWHJG01A484Y	gi|342647469|gb|AFTD01001464.1|	108642	108959	+
F0ZWHJG01A4887	gi|342527670|gb|AFTD01107305.1|	7414	6967	-
F0ZWHJG01A488L	gi|342570527|gb|AFTD01064925.1|	25414	25531	+
F0ZWHJG01A48EF	gi|342596016|gb|AFTD01052916.1|	11908	12190	+
F0ZWHJG01A48GK	gi|342556170|gb|AFTD01079282.1|	19616	19937	+
F0ZWHJG01A48KE	gi|342528871|gb|AFTD01106104.1|	26946	27235	+
F0ZWHJG01A494B	gi|342616199|gb|AFTD01032733.1|	40659	40519	-
F0ZWHJG01A49L9	gi|342538650|gb|AFTD01096325.1|	81771	81871	+
F0ZWHJG01A49T1	gi|342589276|gb|AFTD01056970.1|	11224	11488	+
F0ZWHJG01A4A4X	gi|342565311|gb|AFTD01070141.1|	35428	35191	-
F0ZWHJG01A4AB1	gi|342475412|gb|AFTD01159059.1|	3966	3867	-
F0ZWHJG01A4AIN	gi|342495937|gb|AFTD01138534.1|	45779	45356	-
F0ZWHJG01A4ARF	gi|342584427|gb|AFTD01058619.1|	25398	25270	-
F0ZWHJG01A4ASV	gi|342595680|gb|AFTD01053252.1|	40017	39670	-
F0ZWHJG01A4BIB	gi|342637302|gb|AFTD01011631.1|	22038	22146	+
F0ZWHJG01A4CAK	gi|342625733|gb|AFTD01023199.1|	51266	51168	-
F0ZWHJG01A4CWF	gi|342528925|gb|AFTD01106050.1|	12708	13139	+
F0ZWHJG01A4DKF	gi|342609789|gb|AFTD01039143.1|	55775	55640	-
F0ZWHJG01A4DUM	gi|342598226|gb|AFTD01050706.1|	32329	32399	+
F0ZWHJG01A4DVY	gi|342647621|gb|AFTD01001312.1|	12939	13309	+
F0ZWHJG01A4EQ8	gi|342533515|gb|AFTD01101460.1|	27125	26724	-
F0ZWHJG01A4ESF	gi|342622144|gb|AFTD01026788.1|	9441	9865	+
F0ZWHJG01A4EXP	gi|342499584|gb|AFTD01134887.1|	1170	716	-
F0ZWHJG01A4FCM	gi|342557122|gb|AFTD01078330.1|	506	126	-
F0ZWHJG01A4FKV	gi|342581364|gb|AFTD01059641.1|	27936	28233	+
F0ZWHJG01A4FVE	gi|342517593|gb|AFTD01117083.1|	8141	8429	+
F0ZWHJG01A4G38	gi|342611739|gb|AFTD01037193.1|	98	1	-
F0ZWHJG01A4G42	gi|342630229|gb|AFTD01018703.1|	3904	4316	+
F0ZWHJG01A4G5Y	gi|342502226|gb|AFTD01132245.1|	15787	15375	-
F0ZWHJG01A4GB8	gi|342531725|gb|AFTD01103250.1|	15448	15575	+
F0ZWHJG01A4GU9	gi|342584211|gb|AFTD01058691.1|	2829	2497	-
F0ZWHJG01A4GUE	gi|342579004|gb|AFTD01060429.1|	4289	3930	-
F0ZWHJG01A4H09	gi|342593777|gb|AFTD01055006.1|	21027	21382	+
F0ZWHJG01A4H60	gi|342566823|gb|AFTD01068629.1|	7441	7770	+
F0ZWHJG01A4HQ9	gi|342546339|gb|AFTD01088636.1|	81447	80971	-
F0ZWHJG01A4HYP	gi|342493577|gb|AFTD01140894.1|	40098	39737	-
F0ZWHJG01A4I5K	gi|342538672|gb|AFTD01096303.1|	47844	47614	-
F0ZWHJG01A4IAV	gi|342370987|gb|AFTD01262551.1|	993	725	-
F0ZWHJG01A4IEM	gi|342521017|gb|AFTD01113926.1|	28372	27971	-
F0ZWHJG01A4IFD	gi|342568682|gb|AFTD01066770.1|	11250	10843	-
F0ZWHJG01A4IGR	gi|342565380|gb|AFTD01070072.1|	3620	3185	-
F0ZWHJG01A4IIZ	gi|342569574|gb|AFTD01065878.1|	104340	104439	+
F0ZWHJG01A4ILK	gi|342532237|gb|AFTD01102738.1|	38177	37982	-
F0ZWHJG01A4IQX	gi|342623069|gb|AFTD01025863.1|	10634	10771	+
F0ZWHJG01A4J5V	gi|342617409|gb|AFTD01031523.1|	51380	51310	-
F0ZWHJG01A4J7Y	gi|342568743|gb|AFTD01066709.1|	6791	6348	-
F0ZWHJG01A4JQX	gi|342566090|gb|AFTD01069362.1|	149615	149467	-
F0ZWHJG01A4JUZ	gi|342616494|gb|AFTD01032438.1|	20891	20428	-
F0ZWHJG01A4K47	gi|342625252|gb|AFTD01023680.1|	2427	2769	+
F0ZWHJG01A4KTD	gi|342504029|gb|AFTD01130526.1|	22404	22177	-
F0ZWHJG01A4L14	gi|342621810|gb|AFTD01027122.1|	36268	36587	+
F0ZWHJG01A4L2O	gi|342515823|gb|AFTD01118735.1|	7531	7267	-
F0ZWHJG01A4LCG	gi|342369228|gb|AFTD01264310.1|	147	541	+
F0ZWHJG01A4LN2	gi|342535492|gb|AFTD01099483.1|	52544	52990	+
F0ZWHJG01A4M23	gi|342573210|gb|AFTD01062405.1|	19578	20001	+
F0ZWHJG01A4M3Q	gi|342634047|gb|AFTD01014886.1|	6894	7312	+
F0ZWHJG01A4M90	gi|342609236|gb|AFTD01039696.1|	16095	16048	-
F0ZWHJG01A4MG1	gi|342633670|gb|AFTD01015263.1|	11386	11587	+
F0ZWHJG01A4MHL	gi|342511546|gb|AFTD01123009.1|	3716	3442	-
F0ZWHJG01A4MYI	gi|342548988|gb|AFTD01086464.1|	28430	28748	+
F0ZWHJG01A4N4Q	gi|342639714|gb|AFTD01009219.1|	116990	117402	+
F0ZWHJG01A4N9F	gi|342538685|gb|AFTD01096290.1|	13873	13681	-
F0ZWHJG01A4NF1	gi|342596029|gb|AFTD01052903.1|	40864	40590	-
F0ZWHJG01A4NIZ	gi|342576407|gb|AFTD01061315.1|	9390	8910	-
F0ZWHJG01A4NVR	gi|342642740|gb|AFTD01006193.1|	5435	4982	-
F0ZWHJG01A4O1F	gi|342550119|gb|AFTD01085333.1|	25072	25445	+
F0ZWHJG01A4O6C	gi|342521687|gb|AFTD01113288.1|	3427	3751	+
F0ZWHJG01A4OAQ	gi|342544761|gb|AFTD01090214.1|	35882	35466	-
F0ZWHJG01A4OBQ	gi|342516811|gb|AFTD01117845.1|	22880	22651	-
F0ZWHJG01A4OE6	gi|342530021|gb|AFTD01104954.1|	44142	43715	-
F0ZWHJG01A4OTZ	gi|342603377|gb|AFTD01045555.1|	35977	36066	+
F0ZWHJG01A4P0X	gi|342506506|gb|AFTD01128049.1|	12159	11811	-
F0ZWHJG01A4PEW	gi|342480474|gb|AFTD01153997.1|	784	301	-
F0ZWHJG01A4PO0	gi|342370057|gb|AFTD01263481.1|	868	622	-
F0ZWHJG01A4PP1	gi|342532511|gb|AFTD01102464.1|	16458	15946	-
F0ZWHJG01A4Q7F	gi|342571050|gb|AFTD01064402.1|	48779	48638	-
F0ZWHJG01A4QI1	gi|342494049|gb|AFTD01140422.1|	6043	5674	-
F0ZWHJG01A4QT5	gi|342598155|gb|AFTD01050777.1|	40829	41018	+
F0ZWHJG01A4QUJ	gi|342567626|gb|AFTD01067826.1|	33051	32676	-
F0ZWHJG01A4R4L	gi|342483401|gb|AFTD01151070.1|	2775	2392	-
F0ZWHJG01A4RJH	gi|342633805|gb|AFTD01015128.1|	5643	5485	-
F0ZWHJG01A4RK0	gi|342594227|gb|AFTD01054705.1|	18287	18763	+
F0ZWHJG01A4RNG	gi|342634184|gb|AFTD01014749.1|	364	727	+
F0ZWHJG01A4RUQ	gi|342624368|gb|AFTD01024564.1|	23852	23539	-
F0ZWHJG01A4S6Q	gi|342383079|gb|AFTD01250461.1|	293	459	+
F0ZWHJG01A4SDF	gi|342575911|gb|AFTD01061480.1|	35411	35079	-
F0ZWHJG01A4SEB	gi|342595006|gb|AFTD01053926.1|	4066	4459	+
F0ZWHJG01A4SMU	gi|342484115|gb|AFTD01150356.1|	9973	9557	-
F0ZWHJG01A4TDF	gi|342595834|gb|AFTD01053098.1|	13402	13714	+
F0ZWHJG01A4TJ9	gi|342639747|gb|AFTD01009186.1|	29060	29296	+
F0ZWHJG01A4TJR	gi|342618266|gb|AFTD01030666.1|	42949	43300	+
F0ZWHJG01A4TLC	gi|342544481|gb|AFTD01090494.1|	3396	2995	-
F0ZWHJG01A4TPJ	gi|342576407|gb|AFTD01061315.1|	9389	9304	-
F0ZWHJG01A4V4X	gi|342518888|gb|AFTD01115908.1|	4743	4581	-
F0ZWHJG01A4VE0	gi|342553827|gb|AFTD01081625.1|	6941	7385	+
F0ZWHJG01A4VP8	gi|342621207|gb|AFTD01027725.1|	21698	22159	+
F0ZWHJG01A4VQN	gi|342559849|gb|AFTD01075603.1|	13545	13961	+
F0ZWHJG01A4W2I	gi|342568980|gb|AFTD01066472.1|	20956	21019	+
F0ZWHJG01A4W7N	gi|342644655|gb|AFTD01004278.1|	3796	3543	-
F0ZWHJG01A4WGH	gi|342596838|gb|AFTD01052094.1|	150187	150611	+
F0ZWHJG01A4WHF	gi|342600912|gb|AFTD01048020.1|	9631	9475	-
F0ZWHJG01A4WHH	gi|342565386|gb|AFTD01070066.1|	57	306	+
F0ZWHJG01A4WHY	gi|342528925|gb|AFTD01106050.1|	12729	13129	+
F0ZWHJG01A4WI9	gi|342564859|gb|AFTD01070593.1|	21472	21148	-
F0ZWHJG01A4XBZ	gi|342608491|gb|AFTD01040441.1|	19774	20079	+
F0ZWHJG01A4Y4K	gi|342544334|gb|AFTD01090641.1|	25568	25071	-
F0ZWHJG01A4YC2	gi|342504029|gb|AFTD01130526.1|	22496	22160	-
F0ZWHJG01A4YCJ	gi|342536814|gb|AFTD01098161.1|	671	292	-
F0ZWHJG01A4YRB	gi|342531823|gb|AFTD01103152.1|	34620	34986	+
F0ZWHJG01A4Z0Q	gi|342502346|gb|AFTD01132125.1|	5700	5395	-
F0ZWHJG01A4Z92	gi|342513675|gb|AFTD01120880.1|	4620	5011	+
F0ZWHJG01A4Z9L	gi|342565377|gb|AFTD01070075.1|	2187	1865	-
F0ZWHJG01A4ZIP	gi|342540643|gb|AFTD01094332.1|	5977	5851	-
F0ZWHJG01A4ZZL	gi|342568740|gb|AFTD01066712.1|	19088	19485	+
F0ZWHJG01A5069	gi|342483401|gb|AFTD01151070.1|	2775	2414	-
F0ZWHJG01A50RH	gi|342640257|gb|AFTD01008676.1|	3276	2868	-
F0ZWHJG01A5172	gi|342524677|gb|AFTD01110298.1|	83653	83404	-
F0ZWHJG01A51GN	gi|342596159|gb|AFTD01052773.1|	16659	16261	-
F0ZWHJG01A52BP	gi|342524236|gb|AFTD01110739.1|	21553	21871	+
F0ZWHJG01A52VB	gi|342501228|gb|AFTD01133243.1|	1505	1405	-
F0ZWHJG01A532M	gi|342520773|gb|AFTD01114167.1|	99410	99142	-
F0ZWHJG01A5399	gi|342571748|gb|AFTD01063704.1|	33770	33704	-
F0ZWHJG01A53GS	gi|342584364|gb|AFTD01058640.1|	6086	6374	+
F0ZWHJG01A53PN	gi|342523127|gb|AFTD01111848.1|	26038	26366	+
F0ZWHJG01A53UW	gi|342534676|gb|AFTD01100299.1|	54629	54319	-
F0ZWHJG01A545D	gi|342621894|gb|AFTD01027038.1|	45725	45669	-
F0ZWHJG01A5491	gi|342515958|gb|AFTD01118600.1|	20439	20333	-
F0ZWHJG01A54MK	gi|342599071|gb|AFTD01049861.1|	42091	42032	-
F0ZWHJG01A554N	gi|342646440|gb|AFTD01002493.1|	60373	60684	+
F0ZWHJG01A55BH	gi|342643608|gb|AFTD01005325.1|	4907	4843	-
F0ZWHJG01A55KW	gi|342561444|gb|AFTD01074008.1|	15704	16075	+
F0ZWHJG01A55NI	gi|342539614|gb|AFTD01095361.1|	39028	38585	-
F0ZWHJG01A563Q	gi|342526926|gb|AFTD01108049.1|	12213	11810	-
F0ZWHJG01A56IA	gi|342619403|gb|AFTD01029529.1|	29101	28764	-
F0ZWHJG01A56N9	gi|342607058|gb|AFTD01041874.1|	67672	67372	-
F0ZWHJG01A56TK	gi|342503966|gb|AFTD01130589.1|	3399	3006	-
F0ZWHJG01A57AM	gi|342601471|gb|AFTD01047461.1|	10525	10723	+
F0ZWHJG01A57KV	gi|342532237|gb|AFTD01102738.1|	38192	37982	-
F0ZWHJG01A57Q8	gi|342504007|gb|AFTD01130548.1|	33416	33719	+
F0ZWHJG01A57QS	gi|342597566|gb|AFTD01051366.1|	28230	28486	+
F0ZWHJG01A57ST	gi|342610169|gb|AFTD01038763.1|	6180	5952	-
F0ZWHJG01A587Z	gi|342630626|gb|AFTD01018306.1|	61902	62201	+
F0ZWHJG01A588W	gi|342618596|gb|AFTD01030336.1|	51200	51637	+
F0ZWHJG01A58C2	gi|342558774|gb|AFTD01076678.1|	41541	41982	+
F0ZWHJG01A58EO	gi|342614381|gb|AFTD01034551.1|	108997	108592	-
F0ZWHJG01A58L4	gi|342535532|gb|AFTD01099443.1|	47178	47264	+
F0ZWHJG01A58S1	gi|342527873|gb|AFTD01107102.1|	11524	11133	-
F0ZWHJG01A59AD	gi|342520052|gb|AFTD01114872.1|	17415	17076	-
F0ZWHJG01A59AO	gi|342566823|gb|AFTD01068629.1|	7441	7770	+
F0ZWHJG01A59KJ	gi|342601968|gb|AFTD01046964.1|	22115	21656	-
F0ZWHJG01A59MC	gi|342502324|gb|AFTD01132147.1|	46967	47322	+
F0ZWHJG01A59PA	gi|342600381|gb|AFTD01048551.1|	23720	24127	+
F0ZWHJG01A59TA	gi|342576501|gb|AFTD01061283.1|	17082	17597	+
F0ZWHJG01A5A3V	gi|342529408|gb|AFTD01105567.1|	19867	19508	-
F0ZWHJG01A5A6U	gi|342528444|gb|AFTD01106531.1|	56402	56765	+
F0ZWHJG01A5B05	gi|342556566|gb|AFTD01078886.1|	46841	46923	+
F0ZWHJG01A5B25	gi|342570057|gb|AFTD01065395.1|	7	395	+
F0ZWHJG01A5BN3	gi|342619273|gb|AFTD01029659.1|	18785	18560	-
F0ZWHJG01A5BNA	gi|342614467|gb|AFTD01034465.1|	47218	47130	-
F0ZWHJG01A5BT2	gi|342565380|gb|AFTD01070072.1|	7253	7544	+
F0ZWHJG01A5BZJ	gi|342535286|gb|AFTD01099689.1|	61173	61093	-
F0ZWHJG01A5CAL	gi|342557495|gb|AFTD01077957.1|	24701	24344	-
F0ZWHJG01A5CKS	gi|342606513|gb|AFTD01042419.1|	12886	13299	+
F0ZWHJG01A5CWA	gi|342645467|gb|AFTD01003466.1|	9600	9899	+
F0ZWHJG01A5DCJ	gi|342633961|gb|AFTD01014972.1|	12657	12426	-
F0ZWHJG01A5DXU	gi|342648636|gb|AFTD01000491.1|	11	372	+
F0ZWHJG01A5EPO	gi|342624950|gb|AFTD01023982.1|	97708	97425	-
F0ZWHJG01A5FOP	gi|342645326|gb|AFTD01003607.1|	50467	50162	-
F0ZWHJG01A5FY6	gi|342601345|gb|AFTD01047587.1|	140773	141156	+
F0ZWHJG01A5GG2	gi|342528925|gb|AFTD01106050.1|	12727	12980	+
F0ZWHJG01A5GN8	gi|342562206|gb|AFTD01073246.1|	4243	3878	-
F0ZWHJG01A5H7A	gi|342525961|gb|AFTD01109014.1|	32990	32583	-
F0ZWHJG01A5HVE	gi|342489272|gb|AFTD01145199.1|	46803	47149	+
F0ZWHJG01A5I8K	gi|342503967|gb|AFTD01130588.1|	14215	14494	+
F0ZWHJG01A5IK1	gi|342616340|gb|AFTD01032592.1|	65944	66160	+
F0ZWHJG01A5IPN	gi|342592571|gb|AFTD01055610.1|	1521	1374	-
F0ZWHJG01A5ISY	gi|342607527|gb|AFTD01041405.1|	79801	79445	-
F0ZWHJG01A5JRF	gi|342640950|gb|AFTD01007983.1|	88213	87820	-
F0ZWHJG01A5JXI	gi|342568749|gb|AFTD01066703.1|	20959	21051	+
F0ZWHJG01A5L90	gi|342596260|gb|AFTD01052672.1|	10082	9931	-
F0ZWHJG01A5L9K	gi|342521543|gb|AFTD01113432.1|	67100	67423	+
F0ZWHJG01A5LE0	gi|342558322|gb|AFTD01077130.1|	61520	61339	-
F0ZWHJG01A5LIX	gi|342631109|gb|AFTD01017823.1|	663	611	-
F0ZWHJG01A5M32	gi|342619428|gb|AFTD01029504.1|	38905	39172	+
F0ZWHJG01A5MDU	gi|342554177|gb|AFTD01081275.1|	26574	26103	-
F0ZWHJG01A5MEI	gi|342497421|gb|AFTD01137050.1|	37113	36750	-
F0ZWHJG01A5MHI	gi|342645573|gb|AFTD01003360.1|	20341	20733	+
F0ZWHJG01A5MJM	gi|342528828|gb|AFTD01106147.1|	32596	32809	+
F0ZWHJG01A5NF3	gi|342527116|gb|AFTD01107859.1|	28156	27811	-
F0ZWHJG01A5NHZ	gi|342611196|gb|AFTD01037736.1|	54379	54057	-
F0ZWHJG01A5NRN	gi|342594828|gb|AFTD01054104.1|	18787	19226	+
F0ZWHJG01A5NZZ	gi|342594634|gb|AFTD01054298.1|	29524	29999	+
F0ZWHJG01A5O0S	gi|342592735|gb|AFTD01055528.1|	9434	9206	-
F0ZWHJG01A5OC4	gi|342594593|gb|AFTD01054339.1|	37732	37956	+
F0ZWHJG01A5OQI	gi|342554481|gb|AFTD01080971.1|	816	430	-
F0ZWHJG01A5OTS	gi|342515084|gb|AFTD01119471.1|	9054	8999	-
F0ZWHJG01A5P6O	gi|342521398|gb|AFTD01113574.1|	54219	54099	-
F0ZWHJG01A5P8T	gi|342508807|gb|AFTD01125748.1|	23039	23410	+
F0ZWHJG01A5PBZ	gi|342625388|gb|AFTD01023544.1|	126026	126411	+
F0ZWHJG01A5POC	gi|342645576|gb|AFTD01003357.1|	15377	15722	+
F0ZWHJG01A5PUT	gi|342482891|gb|AFTD01151580.1|	35111	35522	+
F0ZWHJG01A5PWL	gi|342576773|gb|AFTD01061193.1|	35693	35287	-
F0ZWHJG01A5Q0U	gi|342623270|gb|AFTD01025662.1|	27054	27412	+
F0ZWHJG01A5Q2D	gi|342597473|gb|AFTD01051459.1|	11363	11750	+
F0ZWHJG01A5Q33	gi|342624567|gb|AFTD01024365.1|	10198	9760	-
F0ZWHJG01A5QGE	gi|342555664|gb|AFTD01079788.1|	2033	1618	-
F0ZWHJG01A5QGM	gi|342556180|gb|AFTD01079272.1|	7826	7701	-
F0ZWHJG01A5QH0	gi|342509367|gb|AFTD01125188.1|	4487	4055	-
F0ZWHJG01A5QOM	gi|342563264|gb|AFTD01072188.1|	3201	3021	-
F0ZWHJG01A5RK5	gi|342597561|gb|AFTD01051371.1|	31581	31494	-
F0ZWHJG01A5RNW	gi|342615174|gb|AFTD01033758.1|	11377	11073	-
F0ZWHJG01A5SFZ	gi|342594368|gb|AFTD01054564.1|	20422	20843	+
F0ZWHJG01A5SMC	gi|342516388|gb|AFTD01118179.1|	32006	31724	-
F0ZWHJG01A5SSJ	gi|342529394|gb|AFTD01105581.1|	835	1036	+
F0ZWHJG01A5SSN	gi|342514317|gb|AFTD01120238.1|	1869	2326	+
F0ZWHJG01A5T6D	gi|342625358|gb|AFTD01023574.1|	72428	72085	-
F0ZWHJG01A5T8I	gi|342613806|gb|AFTD01035126.1|	105541	105058	-
F0ZWHJG01A5TRP	gi|342530239|gb|AFTD01104736.1|	24252	24189	-
F0ZWHJG01A5U43	gi|342645056|gb|AFTD01003877.1|	316	663	+
F0ZWHJG01A5UA5	gi|342613535|gb|AFTD01035397.1|	27620	27162	-
F0ZWHJG01A5UZY	gi|342496069|gb|AFTD01138402.1|	24296	24039	-
F0ZWHJG01A5V6J	gi|342514093|gb|AFTD01120462.1|	3329	3738	+
F0ZWHJG01A5VNS	gi|342483401|gb|AFTD01151070.1|	7028	6892	-
F0ZWHJG01A5WT7	gi|342646418|gb|AFTD01002515.1|	41021	40619	-
F0ZWHJG01A5WW7	gi|342630054|gb|AFTD01018878.1|	31913	32162	+
F0ZWHJG01A5WX2	gi|342541622|gb|AFTD01093353.1|	594	957	+
F0ZWHJG01A5XAZ	gi|342602511|gb|AFTD01046421.1|	37283	37702	+
F0ZWHJG01A5XCE	gi|342541332|gb|AFTD01093643.1|	16597	16119	-
F0ZWHJG01A5XLV	gi|342572710|gb|AFTD01062742.1|	2313	2547	+
F0ZWHJG01A5XU4	gi|342565115|gb|AFTD01070337.1|	47278	47558	+
F0ZWHJG01A5Y6X	gi|342528529|gb|AFTD01106446.1|	6994	7302	+
F0ZWHJG01A5YUP	gi|342515711|gb|AFTD01118847.1|	2598	2776	+
F0ZWHJG01A5YZH	gi|342525786|gb|AFTD01109189.1|	22299	22360	+
F0ZWHJG01A5ZA8	gi|342559855|gb|AFTD01075597.1|	6717	7227	+
F0ZWHJG01A5ZAK	gi|342634685|gb|AFTD01014248.1|	6379	6463	+
F0ZWHJG01A5ZJ9	gi|342502634|gb|AFTD01131837.1|	70140	70215	+
F0ZWHJG01A5ZKO	gi|342537975|gb|AFTD01097000.1|	109962	110356	+
F0ZWHJG01A5ZR2	gi|342550398|gb|AFTD01085054.1|	18290	18169	-
F0ZWHJG01A5ZSC	gi|342556433|gb|AFTD01079019.1|	2435	2775	+
F0ZWHJG01A5ZVW	gi|342611045|gb|AFTD01037887.1|	25097	25491	+
F0ZWHJG01A601I	gi|342567145|gb|AFTD01068307.1|	10226	10496	+
F0ZWHJG01A60QP	gi|342526894|gb|AFTD01108081.1|	15018	15432	+
F0ZWHJG01A6151	gi|342544770|gb|AFTD01090205.1|	21409	21005	-
F0ZWHJG01A61HB	gi|342646255|gb|AFTD01002678.1|	25242	24805	-
F0ZWHJG01A61JQ	gi|342617294|gb|AFTD01031638.1|	25763	26081	+
F0ZWHJG01A61T9	gi|342616281|gb|AFTD01032651.1|	13357	13822	+
F0ZWHJG01A61Y0	gi|342575389|gb|AFTD01061674.1|	15619	15293	-
F0ZWHJG01A62CP	gi|342495538|gb|AFTD01138933.1|	48549	48303	-
F0ZWHJG01A62D2	gi|342545908|gb|AFTD01089067.1|	14313	14598	+
F0ZWHJG01A62JB	gi|342507695|gb|AFTD01126860.1|	2351	1962	-
F0ZWHJG01A62MF	gi|342515705|gb|AFTD01118852.1|	5132	5575	+
F0ZWHJG01A62VA	gi|342548771|gb|AFTD01086681.1|	6599	6383	-
F0ZWHJG01A637R	gi|342524781|gb|AFTD01110194.1|	11262	11154	-
F0ZWHJG01A63FQ	gi|342542371|gb|AFTD01092604.1|	43056	43345	+
F0ZWHJG01A647Q	gi|342545908|gb|AFTD01089067.1|	14485	14602	+
F0ZWHJG01A648E	gi|342597674|gb|AFTD01051258.1|	17441	17851	+
F0ZWHJG01A653T	gi|342642338|gb|AFTD01006595.1|	26325	26665	+
F0ZWHJG01A655G	gi|342609789|gb|AFTD01039143.1|	17000	17312	+
F0ZWHJG01A659O	gi|342616434|gb|AFTD01032498.1|	17424	17787	+
F0ZWHJG01A65HN	gi|342635571|gb|AFTD01013362.1|	17628	17282	-
F0ZWHJG01A65UO	gi|342594453|gb|AFTD01054479.1|	37362	37036	-
F0ZWHJG01A65VG	gi|342495686|gb|AFTD01138785.1|	19294	18986	-
F0ZWHJG01A660B	gi|342582808|gb|AFTD01059159.1|	59940	59628	-
F0ZWHJG01A665Y	gi|342621345|gb|AFTD01027587.1|	41879	41525	-
F0ZWHJG01A66I3	gi|342518667|gb|AFTD01116125.1|	48802	48669	-
F0ZWHJG01A66MZ	gi|342491360|gb|AFTD01143111.1|	23511	23699	+
F0ZWHJG01A66RU	gi|342524472|gb|AFTD01110503.1|	865	1031	+
F0ZWHJG01A67JB	gi|342490407|gb|AFTD01144064.1|	20728	20799	+
F0ZWHJG01A67LM	gi|342616329|gb|AFTD01032603.1|	70660	70143	-
F0ZWHJG01A67WT	gi|342636358|gb|AFTD01012575.1|	18364	18478	+
F0ZWHJG01A680I	gi|342596029|gb|AFTD01052903.1|	40916	40590	-
F0ZWHJG01A687V	gi|342545133|gb|AFTD01089842.1|	34471	34849	+
F0ZWHJG01A68BO	gi|342594905|gb|AFTD01054027.1|	10969	11437	+
F0ZWHJG01A68MU	gi|342607852|gb|AFTD01041080.1|	6701	6772	+
F0ZWHJG01A68ZW	gi|342618196|gb|AFTD01030736.1|	7675	8089	+
F0ZWHJG01A69CA	gi|342540642|gb|AFTD01094333.1|	8366	8790	+
F0ZWHJG01A69HY	gi|342622994|gb|AFTD01025938.1|	44584	45013	+
F0ZWHJG01A69K0	gi|342559855|gb|AFTD01075597.1|	6785	6936	+
F0ZWHJG01A69KT	gi|342608580|gb|AFTD01040352.1|	15708	15260	-
F0ZWHJG01A69S0	gi|342559318|gb|AFTD01076134.1|	15402	15477	+
F0ZWHJG01A69XJ	gi|342525959|gb|AFTD01109016.1|	36545	36882	+
F0ZWHJG01A69YU	gi|342563389|gb|AFTD01072063.1|	2463	2085	-
F0ZWHJG01A6A9B	gi|342631085|gb|AFTD01017847.1|	10403	10810	+
F0ZWHJG01A6AJY	gi|342636594|gb|AFTD01012339.1|	7756	7303	-
F0ZWHJG01A6B6X	gi|342630430|gb|AFTD01018502.1|	27520	27120	-
F0ZWHJG01A6BJ3	gi|342616499|gb|AFTD01032433.1|	30920	30626	-
F0ZWHJG01A6BJ6	gi|342491613|gb|AFTD01142858.1|	11662	11360	-
F0ZWHJG01A6CGZ	gi|342562251|gb|AFTD01073201.1|	544	252	-
F0ZWHJG01A6CHH	gi|342641054|gb|AFTD01007879.1|	6393	6566	+
F0ZWHJG01A6CUD	gi|342571042|gb|AFTD01064410.1|	11680	12066	+
F0ZWHJG01A6D83	gi|342622436|gb|AFTD01026496.1|	17348	17436	+
F0ZWHJG01A6DIE	gi|342614447|gb|AFTD01034485.1|	12243	12556	+
F0ZWHJG01A6EAV	gi|342610760|gb|AFTD01038172.1|	71172	71341	+
F0ZWHJG01A6EBJ	gi|342505862|gb|AFTD01128693.1|	71774	72133	+
F0ZWHJG01A6EVT	gi|342569833|gb|AFTD01065619.1|	1722	1572	-
F0ZWHJG01A6EX1	gi|342623257|gb|AFTD01025675.1|	1812	2079	+
F0ZWHJG01A6F1Y	gi|342612055|gb|AFTD01036877.1|	36998	37101	+
F0ZWHJG01A6F7G	gi|342544465|gb|AFTD01090510.1|	5305	4950	-
F0ZWHJG01A6F7V	gi|342630059|gb|AFTD01018873.1|	21495	21183	-
F0ZWHJG01A6FXN	gi|342505506|gb|AFTD01129049.1|	19295	18934	-
F0ZWHJG01A6GKQ	gi|342606117|gb|AFTD01042815.1|	6603	6393	-
F0ZWHJG01A6GPO	gi|342521398|gb|AFTD01113574.1|	54152	54101	-
F0ZWHJG01A6GWH	gi|342559257|gb|AFTD01076195.1|	153796	153513	-
F0ZWHJG01A6H0S	gi|342607869|gb|AFTD01041063.1|	72115	71968	-
F0ZWHJG01A6H2L	gi|342623830|gb|AFTD01025102.1|	13163	13038	-
F0ZWHJG01A6H4J	gi|342561511|gb|AFTD01073941.1|	491	889	+
F0ZWHJG01A6I53	gi|342561843|gb|AFTD01073609.1|	20145	19704	-
F0ZWHJG01A6IJX	gi|342641549|gb|AFTD01007384.1|	16935	16595	-
F0ZWHJG01A6J23	gi|342643315|gb|AFTD01005618.1|	143509	143755	+
F0ZWHJG01A6J6G	gi|342632662|gb|AFTD01016271.1|	2251	2566	+
F0ZWHJG01A6J78	gi|342553958|gb|AFTD01081494.1|	9192	9495	+
F0ZWHJG01A6JDA	gi|342641101|gb|AFTD01007832.1|	6061	5697	-
F0ZWHJG01A6JIW	gi|342613720|gb|AFTD01035212.1|	31881	32313	+
F0ZWHJG01A6JW8	gi|342560494|gb|AFTD01074958.1|	34727	34679	-
F0ZWHJG01A6K6H	gi|342620730|gb|AFTD01028202.1|	38765	38475	-
F0ZWHJG01A6K9E	gi|342592403|gb|AFTD01055694.1|	38900	39205	+
F0ZWHJG01A6KLA	gi|342619401|gb|AFTD01029531.1|	9641	10003	+
F0ZWHJG01A6KM4	gi|342645780|gb|AFTD01003153.1|	179900	179683	-
F0ZWHJG01A6L2O	gi|342591583|gb|AFTD01056099.1|	5371	5013	-
F0ZWHJG01A6M31	gi|342509571|gb|AFTD01124984.1|	31780	31441	-
F0ZWHJG01A6MQ0	gi|342483401|gb|AFTD01151070.1|	2775	2392	-
F0ZWHJG01A6MQM	gi|342621350|gb|AFTD01027582.1|	2441	2844	+
F0ZWHJG01A6MS5	gi|342645924|gb|AFTD01003009.1|	48860	48985	+
F0ZWHJG01A6N00	gi|342519523|gb|AFTD01115369.1|	5640	5839	+
F0ZWHJG01A6NQH	gi|342539130|gb|AFTD01095845.1|	5368	5283	-
F0ZWHJG01A6NZ9	gi|342528517|gb|AFTD01106458.1|	23338	23610	+
F0ZWHJG01A6O7O	gi|342622980|gb|AFTD01025952.1|	3668	3561	-
F0ZWHJG01A6O7S	gi|342574660|gb|AFTD01061920.1|	30534	30784	+
F0ZWHJG01A6OCS	gi|342570030|gb|AFTD01065422.1|	34876	34590	-
F0ZWHJG01A6OS8	gi|342511546|gb|AFTD01123009.1|	3813	3442	-
F0ZWHJG01A6P6N	gi|342518995|gb|AFTD01115801.1|	12566	12140	-
F0ZWHJG01A6P7G	gi|342526686|gb|AFTD01108289.1|	76613	76896	+
F0ZWHJG01A6PEX	gi|342529495|gb|AFTD01105480.1|	16074	16515	+
F0ZWHJG01A6PML	gi|342520583|gb|AFTD01114353.1|	19699	20074	+
F0ZWHJG01A6Q75	gi|342485647|gb|AFTD01148824.1|	3500	3140	-
F0ZWHJG01A6QCR	gi|342510260|gb|AFTD01124295.1|	6897	7185	+
F0ZWHJG01A6QDG	gi|342565767|gb|AFTD01069685.1|	15412	15068	-
F0ZWHJG01A6QIO	gi|342571964|gb|AFTD01063488.1|	7307	6920	-
F0ZWHJG01A6QWN	gi|342627369|gb|AFTD01021563.1|	1736	2048	+
F0ZWHJG01A6R30	gi|342517590|gb|AFTD01117086.1|	50345	50807	+
F0ZWHJG01A6RGS	gi|342504009|gb|AFTD01130546.1|	9810	9361	-
F0ZWHJG01A6RLW	gi|342595154|gb|AFTD01053778.1|	5040	4706	-
F0ZWHJG01A6RZQ	gi|342552653|gb|AFTD01082799.1|	4584	4968	+
F0ZWHJG01A6S95	gi|342482656|gb|AFTD01151815.1|	13745	13422	-
F0ZWHJG01A6SQP	gi|342557880|gb|AFTD01077572.1|	5339	5517	+
F0ZWHJG01A6SWT	gi|342475635|gb|AFTD01158836.1|	8562	8813	+
F0ZWHJG01A6SYR	gi|342501691|gb|AFTD01132780.1|	1056	692	-
F0ZWHJG01A6TSU	gi|342522283|gb|AFTD01112692.1|	9290	9000	-
F0ZWHJG01A6UFJ	gi|342521102|gb|AFTD01113841.1|	33395	33194	-
F0ZWHJG01A6UKH	gi|342505662|gb|AFTD01128893.1|	11949	11626	-
F0ZWHJG01A6ULK	gi|342601703|gb|AFTD01047229.1|	45530	46003	+
F0ZWHJG01A6UNO	gi|342596541|gb|AFTD01052391.1|	1192	1452	+
F0ZWHJG01A6URF	gi|342622388|gb|AFTD01026544.1|	30842	31194	+
F0ZWHJG01A6UWT	gi|342645393|gb|AFTD01003540.1|	70604	70989	+
F0ZWHJG01A6UX3	gi|342577086|gb|AFTD01061089.1|	11247	10963	-
F0ZWHJG01A6V3B	gi|342621353|gb|AFTD01027579.1|	21974	21634	-
F0ZWHJG01A6V42	gi|342648636|gb|AFTD01000491.1|	2	328	+
F0ZWHJG01A6V69	gi|342531373|gb|AFTD01103602.1|	19814	20216	+
F0ZWHJG01A6VJ9	gi|342643957|gb|AFTD01004976.1|	11558	11210	-
F0ZWHJG01A6VKJ	gi|342592308|gb|AFTD01055741.1|	2432	2573	+
F0ZWHJG01A6VL1	gi|342504029|gb|AFTD01130526.1|	22392	22147	-
F0ZWHJG01A6W79	gi|342559884|gb|AFTD01075568.1|	2522	2861	+
F0ZWHJG01A6WEI	gi|342572506|gb|AFTD01062946.1|	19976	20310	+
F0ZWHJG01A6WNB	gi|342518028|gb|AFTD01116688.1|	4851	4964	+
F0ZWHJG01A6WNT	gi|342640950|gb|AFTD01007983.1|	88114	87792	-
F0ZWHJG01A6WPV	gi|342534672|gb|AFTD01100303.1|	19494	19095	-
F0ZWHJG01A6WSE	gi|342601691|gb|AFTD01047241.1|	5815	5938	+
F0ZWHJG01A6WSH	gi|342625956|gb|AFTD01022976.1|	3162	2969	-
F0ZWHJG01A6WU1	gi|342644558|gb|AFTD01004375.1|	15069	14800	-
F0ZWHJG01A6X4Z	gi|342518089|gb|AFTD01116627.1|	8558	8440	-
F0ZWHJG01A6XCA	gi|342540344|gb|AFTD01094631.1|	35491	35216	-
F0ZWHJG01A6XK9	gi|342630047|gb|AFTD01018885.1|	24197	24636	+
F0ZWHJG01A6Y6D	gi|342640031|gb|AFTD01008902.1|	7623	7494	-
F0ZWHJG01A6Y7C	gi|342596354|gb|AFTD01052578.1|	16838	17228	+
F0ZWHJG01A6YL7	gi|342592302|gb|AFTD01055744.1|	44079	44490	+
F0ZWHJG01A6Z6S	gi|342639663|gb|AFTD01009270.1|	94767	94705	-
F0ZWHJG01A6ZD7	gi|342508565|gb|AFTD01125990.1|	30821	30647	-
F0ZWHJG01A6ZEQ	gi|342547758|gb|AFTD01087694.1|	76141	75644	-
F0ZWHJG01A6ZKC	gi|342644341|gb|AFTD01004592.1|	4193	3764	-
F0ZWHJG01A6ZKS	gi|342524207|gb|AFTD01110768.1|	4067	4248	+
F0ZWHJG01A6ZNU	gi|342615180|gb|AFTD01033752.1|	42192	42344	+
F0ZWHJG01A6ZRY	gi|342515705|gb|AFTD01118852.1|	6165	6214	+
F0ZWHJG01A6ZT8	gi|342608786|gb|AFTD01040146.1|	10462	10343	-
F0ZWHJG01A6ZTN	gi|342545217|gb|AFTD01089758.1|	16410	15953	-
F0ZWHJG01A6ZWA	gi|342609467|gb|AFTD01039465.1|	28885	29286	+
F0ZWHJG01A6ZZG	gi|342636358|gb|AFTD01012575.1|	18338	18495	+
F0ZWHJG01A707F	gi|342497357|gb|AFTD01137114.1|	26041	25732	-
F0ZWHJG01A70BS	gi|342634415|gb|AFTD01014518.1|	10143	10548	+
F0ZWHJG01A70CX	gi|342623436|gb|AFTD01025496.1|	30579	30905	+
F0ZWHJG01A70OV	gi|342594130|gb|AFTD01054801.1|	3362	3079	-
F0ZWHJG01A70T5	gi|342547297|gb|AFTD01088155.1|	18912	18486	-
F0ZWHJG01A710M	gi|342534391|gb|AFTD01100584.1|	2969	3117	+
F0ZWHJG01A71AA	gi|342581631|gb|AFTD01059552.1|	15277	15713	+
F0ZWHJG01A71HV	gi|342624977|gb|AFTD01023955.1|	17857	18113	+
F0ZWHJG01A71J5	gi|342499908|gb|AFTD01134563.1|	809	1045	+
F0ZWHJG01A71N7	gi|342621116|gb|AFTD01027816.1|	39805	40160	+
F0ZWHJG01A71SD	gi|342529208|gb|AFTD01105767.1|	87969	88196	+
F0ZWHJG01A7241	gi|342626533|gb|AFTD01022399.1|	16451	16052	-
F0ZWHJG01A72CA	gi|342551777|gb|AFTD01083675.1|	5136	5336	+
F0ZWHJG01A72SL	gi|342625066|gb|AFTD01023866.1|	29056	29242	+
F0ZWHJG01A72X3	gi|342544136|gb|AFTD01090839.1|	17287	17611	+
F0ZWHJG01A732W	gi|342541321|gb|AFTD01093654.1|	2801	2451	-
F0ZWHJG01A735F	gi|342594368|gb|AFTD01054564.1|	20422	20769	+
F0ZWHJG01A73GK	gi|342623640|gb|AFTD01025292.1|	14797	15289	+
F0ZWHJG01A73L2	gi|342512591|gb|AFTD01121964.1|	930	611	-
F0ZWHJG01A73QM	gi|342614465|gb|AFTD01034467.1|	11092	10805	-
F0ZWHJG01A73QX	gi|342589276|gb|AFTD01056970.1|	51094	51423	+
F0ZWHJG01A7406	gi|342567149|gb|AFTD01068303.1|	995	725	-
F0ZWHJG01A74CK	gi|342622875|gb|AFTD01026057.1|	80695	80945	+
F0ZWHJG01A74SP	gi|342543673|gb|AFTD01091302.1|	21603	21653	+
F0ZWHJG01A74T8	gi|342576389|gb|AFTD01061321.1|	55292	55631	+
F0ZWHJG01A74TB	gi|342623479|gb|AFTD01025453.1|	61875	61822	-
F0ZWHJG01A74XM	gi|342554767|gb|AFTD01080685.1|	4335	4664	+
F0ZWHJG01A752H	gi|342597949|gb|AFTD01050983.1|	18420	18794	+
F0ZWHJG01A759U	gi|342545205|gb|AFTD01089770.1|	36805	37182	+
F0ZWHJG01A75B3	gi|342647217|gb|AFTD01001716.1|	13111	13217	+
F0ZWHJG01A75BK	gi|342610169|gb|AFTD01038763.1|	6173	5991	-
F0ZWHJG01A75YR	gi|342502630|gb|AFTD01131841.1|	4249	4615	+
F0ZWHJG01A7650	gi|342610488|gb|AFTD01038444.1|	22603	22156	-
F0ZWHJG01A76HH	gi|342505645|gb|AFTD01128910.1|	10114	10483	+
F0ZWHJG01A77KK	gi|342485637|gb|AFTD01148834.1|	4510	4367	-
F0ZWHJG01A77Q9	gi|342610169|gb|AFTD01038763.1|	6148	5984	-
F0ZWHJG01A77R6	gi|342596002|gb|AFTD01052930.1|	7166	7544	+
F0ZWHJG01A77UE	gi|342566823|gb|AFTD01068629.1|	7441	7771	+
F0ZWHJG01A7843	gi|342582808|gb|AFTD01059159.1|	58830	58680	-
F0ZWHJG01A78KE	gi|342559859|gb|AFTD01075593.1|	3090	3464	+
F0ZWHJG01A78N3	gi|342603706|gb|AFTD01045226.1|	127928	128332	+
F0ZWHJG01A798Y	gi|342504253|gb|AFTD01130302.1|	34838	34426	-
F0ZWHJG01A79H5	gi|342597222|gb|AFTD01051710.1|	38087	38478	+
F0ZWHJG01A79ID	gi|342502518|gb|AFTD01131953.1|	53320	52869	-
F0ZWHJG01A79J4	gi|342531688|gb|AFTD01103287.1|	11182	10811	-
F0ZWHJG01A79U5	gi|342564911|gb|AFTD01070541.1|	98949	99338	+
F0ZWHJG01A7A7L	gi|342559855|gb|AFTD01075597.1|	6739	7123	+
F0ZWHJG01A7AC7	gi|342621114|gb|AFTD01027818.1|	21267	20971	-
F0ZWHJG01A7AEC	gi|342484915|gb|AFTD01149556.1|	7684	7959	+
F0ZWHJG01A7AFN	gi|342508256|gb|AFTD01126299.1|	49291	49595	+
F0ZWHJG01A7AKO	gi|342518965|gb|AFTD01115831.1|	6500	6324	-
F0ZWHJG01A7ARC	gi|342570020|gb|AFTD01065432.1|	31130	30722	-
F0ZWHJG01A7ASK	gi|342485647|gb|AFTD01148824.1|	3080	2701	-
F0ZWHJG01A7B0T	gi|342614470|gb|AFTD01034462.1|	130043	129785	-
F0ZWHJG01A7B1W	gi|342598000|gb|AFTD01050932.1|	9767	10163	+
F0ZWHJG01A7BF2	gi|342428463|gb|AFTD01205910.1|	57	126	+
F0ZWHJG01A7BMF	gi|342631581|gb|AFTD01017351.1|	14642	14339	-
F0ZWHJG01A7BUL	gi|342559309|gb|AFTD01076143.1|	83351	83710	+
F0ZWHJG01A7BWW	gi|342612347|gb|AFTD01036585.1|	4254	3850	-
F0ZWHJG01A7C0E	gi|342584910|gb|AFTD01058458.1|	130737	130426	-
F0ZWHJG01A7C1W	gi|342493368|gb|AFTD01141103.1|	34391	34482	+
F0ZWHJG01A7CG3	gi|342565574|gb|AFTD01069878.1|	18404	18545	+
F0ZWHJG01A7CHI	gi|342640948|gb|AFTD01007985.1|	12425	12327	-
F0ZWHJG01A7CJX	gi|342520079|gb|AFTD01114845.1|	19209	18878	-
F0ZWHJG01A7CLB	gi|342601778|gb|AFTD01047154.1|	11994	11820	-
F0ZWHJG01A7CLR	gi|342594571|gb|AFTD01054361.1|	10180	10224	+
F0ZWHJG01A7CVQ	gi|342541657|gb|AFTD01093318.1|	16297	16194	-
F0ZWHJG01A7D3U	gi|342559855|gb|AFTD01075597.1|	6795	6936	+
F0ZWHJG01A7DHT	gi|342559855|gb|AFTD01075597.1|	6807	6963	+
F0ZWHJG01A7ETC	gi|342569559|gb|AFTD01065893.1|	50543	50632	+
F0ZWHJG01A7F9G	gi|342630548|gb|AFTD01018384.1|	32719	32311	-
F0ZWHJG01A7F9S	gi|342556433|gb|AFTD01079019.1|	60923	61024	+
F0ZWHJG01A7FCN	gi|342556595|gb|AFTD01078857.1|	36957	36784	-
F0ZWHJG01A7FJ5	gi|342499339|gb|AFTD01135132.1|	37833	38301	+
F0ZWHJG01A7G31	gi|342535510|gb|AFTD01099465.1|	48637	48812	+
F0ZWHJG01A7GDS	gi|342516388|gb|AFTD01118179.1|	32097	31708	-
F0ZWHJG01A7GOD	gi|342537957|gb|AFTD01097018.1|	16004	15712	-
F0ZWHJG01A7GRK	gi|342609223|gb|AFTD01039709.1|	102	157	+
F0ZWHJG01A7HG8	gi|342539579|gb|AFTD01095396.1|	7622	7867	+
F0ZWHJG01A7HLE	gi|342502374|gb|AFTD01132097.1|	11135	11197	+
F0ZWHJG01A7HMN	gi|342630064|gb|AFTD01018868.1|	31212	31114	-
F0ZWHJG01A7HVQ	gi|342640858|gb|AFTD01008075.1|	17752	18048	+
F0ZWHJG01A7HX3	gi|342515460|gb|AFTD01119095.1|	7252	7698	+
F0ZWHJG01A7I0B	gi|342502577|gb|AFTD01131894.1|	9648	9740	+
F0ZWHJG01A7I0L	gi|342643607|gb|AFTD01005326.1|	15456	15072	-
F0ZWHJG01A7I8X	gi|342630279|gb|AFTD01018653.1|	1941	1598	-
F0ZWHJG01A7IKJ	gi|342575017|gb|AFTD01061801.1|	28091	27886	-
F0ZWHJG01A7IQF	gi|342582912|gb|AFTD01059124.1|	38184	37759	-
F0ZWHJG01A7IRV	gi|342528925|gb|AFTD01106050.1|	12227	12697	+
F0ZWHJG01A7KCZ	gi|342619428|gb|AFTD01029504.1|	39015	39358	+
F0ZWHJG01A7KIU	gi|342590040|gb|AFTD01056715.1|	47827	47464	-
F0ZWHJG01A7KJA	gi|342527650|gb|AFTD01107325.1|	59153	58771	-
F0ZWHJG01A7KMH	gi|342488511|gb|AFTD01145960.1|	35726	35382	-
F0ZWHJG01A7KQN	gi|342527494|gb|AFTD01107481.1|	88773	88857	+
F0ZWHJG01A7L03	gi|342515705|gb|AFTD01118852.1|	6601	6945	+
F0ZWHJG01A7L7D	gi|342630227|gb|AFTD01018705.1|	34567	34653	+
F0ZWHJG01A7MUM	gi|342610513|gb|AFTD01038419.1|	40952	40580	-
F0ZWHJG01A7N1P	gi|342568747|gb|AFTD01066705.1|	43540	43830	+
F0ZWHJG01A7N1Z	gi|342596582|gb|AFTD01052350.1|	57142	56750	-
F0ZWHJG01A7NUX	gi|342571954|gb|AFTD01063498.1|	29860	29518	-
F0ZWHJG01A7O8U	gi|342601643|gb|AFTD01047289.1|	40463	40648	+
F0ZWHJG01A7OFY	gi|342605721|gb|AFTD01043211.1|	9044	9414	+
F0ZWHJG01A7OTP	gi|342645277|gb|AFTD01003656.1|	29724	30061	+
F0ZWHJG01A7OUA	gi|342596233|gb|AFTD01052699.1|	23621	23244	-
F0ZWHJG01A7OYV	gi|342529879|gb|AFTD01105096.1|	10439	10190	-
F0ZWHJG01A7P9U	gi|342619242|gb|AFTD01029690.1|	11824	11409	-
F0ZWHJG01A7PE8	gi|342558248|gb|AFTD01077204.1|	30932	31376	+
F0ZWHJG01A7PEV	gi|342612097|gb|AFTD01036835.1|	1352	1606	+
F0ZWHJG01A7PJM	gi|342563882|gb|AFTD01071570.1|	25322	25699	+
F0ZWHJG01A7PLS	gi|342497877|gb|AFTD01136594.1|	35828	35330	-
F0ZWHJG01A7PUS	gi|342496069|gb|AFTD01138402.1|	24256	23882	-
F0ZWHJG01A7QG7	gi|342625212|gb|AFTD01023720.1|	30080	29956	-
F0ZWHJG01A7QI4	gi|342532290|gb|AFTD01102685.1|	6705	7077	+
F0ZWHJG01A7QPC	gi|342541052|gb|AFTD01093923.1|	23385	23662	+
F0ZWHJG01A7QRZ	gi|342626159|gb|AFTD01022773.1|	1515	1891	+
F0ZWHJG01A7R7I	gi|342580534|gb|AFTD01059918.1|	21906	21732	-
F0ZWHJG01A7R7P	gi|342542350|gb|AFTD01092625.1|	16698	16899	+
F0ZWHJG01A7RD0	gi|342637732|gb|AFTD01011201.1|	4196	3832	-
F0ZWHJG01A7RHX	gi|342646259|gb|AFTD01002674.1|	24528	24871	+
F0ZWHJG01A7RYE	gi|342625212|gb|AFTD01023720.1|	30152	29973	-
F0ZWHJG01A7RZM	gi|342496166|gb|AFTD01138305.1|	61238	60752	-
F0ZWHJG01A7S22	gi|342545560|gb|AFTD01089415.1|	6560	6958	+
F0ZWHJG01A7S9K	gi|342614470|gb|AFTD01034462.1|	130097	129879	-
F0ZWHJG01A7SBW	gi|342487941|gb|AFTD01146530.1|	12554	12886	+
F0ZWHJG01A7SD0	gi|342630279|gb|AFTD01018653.1|	1941	1584	-
F0ZWHJG01A7SK1	gi|342539510|gb|AFTD01095465.1|	39798	39880	+
F0ZWHJG01A7STE	gi|342451623|gb|AFTD01182750.1|	3408	3125	-
F0ZWHJG01A7T5Q	gi|342612419|gb|AFTD01036513.1|	10363	9933	-
F0ZWHJG01A7T8U	gi|342570098|gb|AFTD01065354.1|	19294	18907	-
F0ZWHJG01A7TBG	gi|342514894|gb|AFTD01119661.1|	11104	10753	-
F0ZWHJG01A7TIA	gi|342563303|gb|AFTD01072149.1|	6638	7048	+
F0ZWHJG01A7TP2	gi|342526926|gb|AFTD01108049.1|	12234	11946	-
F0ZWHJG01A7TS0	gi|342497378|gb|AFTD01137093.1|	8399	7983	-
F0ZWHJG01A7TVN	gi|342526926|gb|AFTD01108049.1|	12234	11876	-
F0ZWHJG01A7U9N	gi|342528094|gb|AFTD01106881.1|	1842	2277	+
F0ZWHJG01A7UTR	gi|342549808|gb|AFTD01085644.1|	38084	38182	+
F0ZWHJG01A7UUA	gi|342552163|gb|AFTD01083289.1|	49380	49038	-
F0ZWHJG01A7VC4	gi|342648888|gb|AFTD01000240.1|	11986	12111	+
F0ZWHJG01A7VEZ	gi|342594630|gb|AFTD01054302.1|	82594	82991	+
F0ZWHJG01A7VGX	gi|342643238|gb|AFTD01005695.1|	18099	18526	+
F0ZWHJG01A7VTH	gi|342541510|gb|AFTD01093465.1|	8081	7652	-
F0ZWHJG01A7WDA	gi|342577069|gb|AFTD01061095.1|	21849	21678	-
F0ZWHJG01A7WHW	gi|342409883|gb|AFTD01224490.1|	137	6	-
F0ZWHJG01A7WI6	gi|342596707|gb|AFTD01052225.1|	37948	37577	-
F0ZWHJG01A7WIP	gi|342536814|gb|AFTD01098161.1|	655	522	-
F0ZWHJG01A7X2V	gi|342603370|gb|AFTD01045562.1|	29431	29655	+
F0ZWHJG01A7X9Y	gi|342375719|gb|AFTD01257819.1|	596	994	+
F0ZWHJG01A7XA2	gi|342501660|gb|AFTD01132811.1|	8562	8969	+
F0ZWHJG01A7Y6D	gi|342641516|gb|AFTD01007417.1|	19630	19438	-
F0ZWHJG01A7YP8	gi|342617941|gb|AFTD01030991.1|	33241	32815	-
F0ZWHJG01A7YU0	gi|342601269|gb|AFTD01047663.1|	22961	22899	-
F0ZWHJG01A7YWW	gi|342631472|gb|AFTD01017460.1|	33480	33775	+
F0ZWHJG01A7Z8I	gi|342531547|gb|AFTD01103428.1|	153609	153887	+
F0ZWHJG01A7ZHQ	gi|342571363|gb|AFTD01064089.1|	18577	18332	-
F0ZWHJG01A7ZJB	gi|342610169|gb|AFTD01038763.1|	6181	5985	-
F0ZWHJG01A8086	gi|342630857|gb|AFTD01018075.1|	30511	30243	-
F0ZWHJG01A80LY	gi|342485135|gb|AFTD01149336.1|	700	567	-
F0ZWHJG01A80M1	gi|342575498|gb|AFTD01061634.1|	21836	21485	-
F0ZWHJG01A80QA	gi|342524205|gb|AFTD01110770.1|	61748	62068	+
F0ZWHJG01A80T0	gi|342595285|gb|AFTD01053647.1|	49483	49179	-
F0ZWHJG01A80ZS	gi|342475924|gb|AFTD01158547.1|	10492	10683	+
F0ZWHJG01A818X	gi|342640950|gb|AFTD01007983.1|	92553	92220	-
F0ZWHJG01A81FL	gi|342619571|gb|AFTD01029361.1|	30494	31021	+
F0ZWHJG01A81IG	gi|342537934|gb|AFTD01097041.1|	48248	48631	+
F0ZWHJG01A81KL	gi|342610169|gb|AFTD01038763.1|	6181	5959	-
F0ZWHJG01A81L6	gi|342630047|gb|AFTD01018885.1|	26997	26548	-
F0ZWHJG01A81MA	gi|342611691|gb|AFTD01037241.1|	92936	93256	+
F0ZWHJG01A828Q	gi|342642920|gb|AFTD01006013.1|	13611	13668	+
F0ZWHJG01A82D5	gi|342562251|gb|AFTD01073201.1|	642	330	-
F0ZWHJG01A82DY	gi|342524952|gb|AFTD01110023.1|	49023	49445	+
F0ZWHJG01A82HU	gi|342636650|gb|AFTD01012283.1|	28397	28092	-
F0ZWHJG01A82J5	gi|342529402|gb|AFTD01105573.1|	13199	13652	+
F0ZWHJG01A82LD	gi|342482891|gb|AFTD01151580.1|	32976	33213	+
F0ZWHJG01A82LT	gi|342520383|gb|AFTD01114549.1|	53882	53599	-
F0ZWHJG01A82N8	gi|342561604|gb|AFTD01073848.1|	160149	159675	-
F0ZWHJG01A82W9	gi|342614756|gb|AFTD01034176.1|	65620	65944	+
F0ZWHJG01A82WK	gi|342626134|gb|AFTD01022798.1|	9805	10243	+
F0ZWHJG01A83I3	gi|342605543|gb|AFTD01043389.1|	138	360	+
F0ZWHJG01A83U7	gi|342566241|gb|AFTD01069211.1|	51208	50997	-
F0ZWHJG01A84LM	gi|342570793|gb|AFTD01064659.1|	57877	57693	-
F0ZWHJG01A84MR	gi|342617846|gb|AFTD01031086.1|	4462	4697	+
F0ZWHJG01A84SA	gi|342606372|gb|AFTD01042560.1|	3400	3619	+
F0ZWHJG01A84X1	gi|342529147|gb|AFTD01105828.1|	41329	40992	-
F0ZWHJG01A84YQ	gi|342592395|gb|AFTD01055698.1|	3035	3429	+
F0ZWHJG01A8559	gi|342556293|gb|AFTD01079159.1|	12822	12687	-
F0ZWHJG01A859C	gi|342631525|gb|AFTD01017407.1|	4727	4474	-
F0ZWHJG01A85HV	gi|342511251|gb|AFTD01123304.1|	7216	6836	-
F0ZWHJG01A85KD	gi|342380769|gb|AFTD01252771.1|	406	169	-
F0ZWHJG01A85RN	gi|342556475|gb|AFTD01078977.1|	18333	18043	-
F0ZWHJG01A85VT	gi|342503237|gb|AFTD01131318.1|	8821	8337	-
F0ZWHJG01A86FI	gi|342647189|gb|AFTD01001744.1|	3186	2805	-
F0ZWHJG01A86NL	gi|342469718|gb|AFTD01164753.1|	72	481	+
F0ZWHJG01A86TX	gi|342616340|gb|AFTD01032592.1|	27274	27641	+
F0ZWHJG01A86VK	gi|342566989|gb|AFTD01068463.1|	3413	3820	+
F0ZWHJG01A86XB	gi|342593773|gb|AFTD01055008.1|	16475	16724	+
F0ZWHJG01A871N	gi|342601087|gb|AFTD01047845.1|	20781	20950	+
F0ZWHJG01A873Z	gi|342509777|gb|AFTD01124778.1|	24814	25058	+
F0ZWHJG01A87AN	gi|342585442|gb|AFTD01058280.1|	20352	19926	-
F0ZWHJG01A87AR	gi|342605015|gb|AFTD01043917.1|	5333	5467	+
F0ZWHJG01A87PM	gi|342643195|gb|AFTD01005738.1|	24272	24674	+
F0ZWHJG01A87TT	gi|342647627|gb|AFTD01001306.1|	24887	24627	-
F0ZWHJG01A88EX	gi|342530280|gb|AFTD01104695.1|	7299	6902	-
F0ZWHJG01A88GZ	gi|342495782|gb|AFTD01138689.1|	3487	3028	-
F0ZWHJG01A88IL	gi|342569707|gb|AFTD01065745.1|	4567	4912	+
F0ZWHJG01A8906	gi|342582000|gb|AFTD01059429.1|	32984	32486	-
F0ZWHJG01A890H	gi|342607573|gb|AFTD01041359.1|	17786	17504	-
F0ZWHJG01A89Y5	gi|342515437|gb|AFTD01119118.1|	251576	251313	-
F0ZWHJG01A89YD	gi|342509824|gb|AFTD01124731.1|	9124	8869	-
F0ZWHJG01A8A23	gi|342594130|gb|AFTD01054801.1|	28187	28432	+
F0ZWHJG01A8A5H	gi|342643614|gb|AFTD01005319.1|	14053	14453	+
F0ZWHJG01A8ABW	gi|342641986|gb|AFTD01006947.1|	1958	2362	+
F0ZWHJG01A8ASQ	gi|342560754|gb|AFTD01074698.1|	8359	8590	+
F0ZWHJG01A8AUR	gi|342566241|gb|AFTD01069211.1|	51088	50998	-
F0ZWHJG01A8AXS	gi|342585720|gb|AFTD01058186.1|	6207	5804	-
F0ZWHJG01A8AZ1	gi|342518667|gb|AFTD01116125.1|	48828	48667	-
F0ZWHJG01A8B7O	gi|342527201|gb|AFTD01107774.1|	13012	12662	-
F0ZWHJG01A8BC1	gi|342629767|gb|AFTD01019165.1|	44580	44856	+
F0ZWHJG01A8BNU	gi|342508565|gb|AFTD01125990.1|	27645	27200	-
F0ZWHJG01A8BRC	gi|342379560|gb|AFTD01253978.1|	940	790	-
F0ZWHJG01A8BYE	gi|342594453|gb|AFTD01054479.1|	37377	37147	-
F0ZWHJG01A8C8W	gi|342607413|gb|AFTD01041519.1|	6030	5656	-
F0ZWHJG01A8CC6	gi|342629352|gb|AFTD01019580.1|	83101	82717	-
F0ZWHJG01A8CMT	gi|342596827|gb|AFTD01052105.1|	3240	2833	-
F0ZWHJG01A8DAH	gi|342526198|gb|AFTD01108777.1|	77452	77820	+
F0ZWHJG01A8DIR	gi|342646255|gb|AFTD01002678.1|	21862	21921	+
F0ZWHJG01A8DL2	gi|342530767|gb|AFTD01104208.1|	27385	27435	+
F0ZWHJG01A8DSI	gi|342621621|gb|AFTD01027311.1|	92314	92751	+
F0ZWHJG01A8E1Y	gi|342598352|gb|AFTD01050580.1|	33344	33729	+
F0ZWHJG01A8E5R	gi|342645389|gb|AFTD01003544.1|	912	608	-
F0ZWHJG01A8E7T	gi|342608384|gb|AFTD01040548.1|	15282	14827	-
F0ZWHJG01A8EDZ	gi|342603706|gb|AFTD01045226.1|	127939	128275	+
F0ZWHJG01A8ERX	gi|342561151|gb|AFTD01074301.1|	979	1256	+
F0ZWHJG01A8EXX	gi|342564505|gb|AFTD01070947.1|	2126	2016	-
F0ZWHJG01A8F0U	gi|342642729|gb|AFTD01006204.1|	2691	2347	-
F0ZWHJG01A8G2W	gi|342572694|gb|AFTD01062758.1|	6938	7361	+
F0ZWHJG01A8G5B	gi|342537067|gb|AFTD01097908.1|	67658	67992	+
F0ZWHJG01A8GDT	gi|342626502|gb|AFTD01022430.1|	27877	28339	+
F0ZWHJG01A8GFC	gi|342641981|gb|AFTD01006952.1|	8541	8116	-
F0ZWHJG01A8GWF	gi|342631153|gb|AFTD01017779.1|	141751	141567	-
F0ZWHJG01A8HH4	gi|342518089|gb|AFTD01116627.1|	8602	8535	-
F0ZWHJG01A8HQT	gi|342483907|gb|AFTD01150564.1|	464	708	+
F0ZWHJG01A8HUO	gi|342601667|gb|AFTD01047265.1|	4990	5178	+
F0ZWHJG01A8I5H	gi|342529505|gb|AFTD01105470.1|	6991	6606	-
F0ZWHJG01A8ID9	gi|342554358|gb|AFTD01081094.1|	2647	2558	-
F0ZWHJG01A8IIX	gi|342572710|gb|AFTD01062742.1|	2453	2545	+
F0ZWHJG01A8IMR	gi|342568418|gb|AFTD01067034.1|	26552	26635	+
F0ZWHJG01A8J36	gi|342544763|gb|AFTD01090212.1|	23611	23536	-
F0ZWHJG01A8K4Z	gi|342544468|gb|AFTD01090507.1|	24193	24128	-
F0ZWHJG01A8KUR	gi|342590391|gb|AFTD01056598.1|	12805	12419	-
F0ZWHJG01A8LFS	gi|342605389|gb|AFTD01043543.1|	49819	49408	-
F0ZWHJG01A8LSD	gi|342466043|gb|AFTD01168330.1|	9413	9735	+
F0ZWHJG01A8LVU	gi|342584746|gb|AFTD01058513.1|	47468	47825	+
F0ZWHJG01A8M8G	gi|342549939|gb|AFTD01085513.1|	50008	49685	-
F0ZWHJG01A8MDQ	gi|342463808|gb|AFTD01170565.1|	50957	50745	-
F0ZWHJG01A8MPE	gi|342520096|gb|AFTD01114828.1|	38118	37779	-
F0ZWHJG01A8MZW	gi|342595154|gb|AFTD01053778.1|	4960	4643	-
F0ZWHJG01A8N5H	gi|342557365|gb|AFTD01078087.1|	9774	9308	-
F0ZWHJG01A8NFI	gi|342610601|gb|AFTD01038331.1|	31905	31741	-
F0ZWHJG01A8NIN	gi|342633418|gb|AFTD01015515.1|	23698	24110	+
F0ZWHJG01A8NMZ	gi|342607073|gb|AFTD01041859.1|	3711	3349	-
F0ZWHJG01A8NPU	gi|342555559|gb|AFTD01079893.1|	12560	12117	-
F0ZWHJG01A8NRN	gi|342531723|gb|AFTD01103252.1|	30620	30403	-
F0ZWHJG01A8NXQ	gi|342633644|gb|AFTD01015289.1|	959	1203	+
F0ZWHJG01A8O9D	gi|342640653|gb|AFTD01008280.1|	81693	81794	+
F0ZWHJG01A8O9S	gi|342576803|gb|AFTD01061183.1|	41907	41400	-
F0ZWHJG01A8OFN	gi|342624354|gb|AFTD01024578.1|	28319	27952	-
F0ZWHJG01A8OR2	gi|342621240|gb|AFTD01027692.1|	3296	3595	+
F0ZWHJG01A8OX7	gi|342488504|gb|AFTD01145967.1|	1391	1880	+
F0ZWHJG01A8P0C	gi|342597189|gb|AFTD01051743.1|	6628	7024	+
F0ZWHJG01A8PBT	gi|342597037|gb|AFTD01051895.1|	7104	6698	-
F0ZWHJG01A8PZ5	gi|342516197|gb|AFTD01118363.1|	10549	10262	-
F0ZWHJG01A8Q0Q	gi|342648539|gb|AFTD01000564.1|	85326	85574	+
F0ZWHJG01A8QB5	gi|342527797|gb|AFTD01107178.1|	8591	8651	+
F0ZWHJG01A8QIK	gi|342610811|gb|AFTD01038121.1|	55607	55990	+
F0ZWHJG01A8QUM	gi|342492695|gb|AFTD01141776.1|	3864	4051	+
F0ZWHJG01A8RJC	gi|342599586|gb|AFTD01049346.1|	16544	16395	-
F0ZWHJG01A8RLT	gi|342595601|gb|AFTD01053331.1|	13682	13803	+
F0ZWHJG01A8RMO	gi|342533144|gb|AFTD01101831.1|	33876	33530	-
F0ZWHJG01A8ROC	gi|342540714|gb|AFTD01094261.1|	16082	15681	-
F0ZWHJG01A8RXP	gi|342498313|gb|AFTD01136158.1|	16289	16659	+
F0ZWHJG01A8RXS	gi|342638860|gb|AFTD01010073.1|	34688	34291	-
F0ZWHJG01A8SEL	gi|342541817|gb|AFTD01093158.1|	16179	15800	-
F0ZWHJG01A8SFM	gi|342556245|gb|AFTD01079207.1|	12817	12445	-
F0ZWHJG01A8STP	gi|342600862|gb|AFTD01048070.1|	19926	19472	-
F0ZWHJG01A8T0O	gi|342555540|gb|AFTD01079912.1|	10500	10415	-
F0ZWHJG01A8TOK	gi|342648329|gb|AFTD01000670.1|	40040	40479	+
F0ZWHJG01A8TUP	gi|342544483|gb|AFTD01090492.1|	875	1244	+
F0ZWHJG01A8TYJ	gi|342367909|gb|AFTD01265629.1|	333	3	-
F0ZWHJG01A8TZ1	gi|342511882|gb|AFTD01122673.1|	9557	9465	-
F0ZWHJG01A8U5L	gi|342540442|gb|AFTD01094533.1|	2323	2754	+
F0ZWHJG01A8UDP	gi|342491360|gb|AFTD01143111.1|	23511	23816	+
F0ZWHJG01A8UH4	gi|342618365|gb|AFTD01030567.1|	6105	6042	-
F0ZWHJG01A8UIN	gi|342494531|gb|AFTD01139940.1|	8299	8588	+
F0ZWHJG01A8UJV	gi|342640437|gb|AFTD01008496.1|	40490	40308	-
F0ZWHJG01A8UON	gi|342599632|gb|AFTD01049300.1|	10728	10323	-
F0ZWHJG01A8UTY	gi|342554145|gb|AFTD01081307.1|	45626	45846	+
F0ZWHJG01A8UZU	gi|342546339|gb|AFTD01088636.1|	81482	81092	-
F0ZWHJG01A8VXB	gi|342532783|gb|AFTD01102192.1|	16244	16580	+
F0ZWHJG01A8W2C	gi|342615653|gb|AFTD01033279.1|	3644	3836	+
F0ZWHJG01A8W32	gi|342626038|gb|AFTD01022894.1|	4499	4169	-
F0ZWHJG01A8W3Q	gi|342616334|gb|AFTD01032598.1|	9469	9407	-
F0ZWHJG01A8W9J	gi|342630091|gb|AFTD01018841.1|	46118	45785	-
F0ZWHJG01A8WE5	gi|342631344|gb|AFTD01017588.1|	23037	22869	-
F0ZWHJG01A8WO6	gi|342640950|gb|AFTD01007983.1|	92585	92220	-
F0ZWHJG01A8WTS	gi|342556436|gb|AFTD01079016.1|	30226	30660	+
F0ZWHJG01A8X81	gi|342546037|gb|AFTD01088938.1|	4983	4703	-
F0ZWHJG01A8XHP	gi|342486237|gb|AFTD01148234.1|	911	1322	+
F0ZWHJG01A8XX4	gi|342608403|gb|AFTD01040529.1|	59094	59186	+
F0ZWHJG01A8Y1V	gi|342599921|gb|AFTD01049011.1|	54329	53955	-
F0ZWHJG01A8Y2W	gi|342626995|gb|AFTD01021937.1|	51263	50993	-
F0ZWHJG01A8Y3N	gi|342539735|gb|AFTD01095240.1|	11059	11007	-
F0ZWHJG01A8Y8X	gi|342626169|gb|AFTD01022763.1|	45883	46118	+
F0ZWHJG01A8Y97	gi|342548271|gb|AFTD01087181.1|	79601	79971	+
F0ZWHJG01A8YIU	gi|342579116|gb|AFTD01060391.1|	1938	1773	-
F0ZWHJG01A8YSJ	gi|342508241|gb|AFTD01126314.1|	14478	14605	+
F0ZWHJG01A8ZEW	gi|342521687|gb|AFTD01113288.1|	1804	1860	+
F0ZWHJG01A8ZJZ	gi|342538763|gb|AFTD01096212.1|	5749	6129	+
F0ZWHJG01A90JO	gi|342611711|gb|AFTD01037221.1|	26500	26816	+
F0ZWHJG01A91ZB	gi|342541332|gb|AFTD01093643.1|	16505	16050	-
F0ZWHJG01A924U	gi|342623230|gb|AFTD01025702.1|	35754	35444	-
F0ZWHJG01A927M	gi|342648539|gb|AFTD01000564.1|	94735	95259	+
F0ZWHJG01A92EC	gi|342533740|gb|AFTD01101235.1|	36758	37190	+
F0ZWHJG01A92JA	gi|342636969|gb|AFTD01011964.1|	11392	11821	+
F0ZWHJG01A92VZ	gi|342566981|gb|AFTD01068471.1|	53363	53037	-
F0ZWHJG01A92XI	gi|342640950|gb|AFTD01007983.1|	88100	87820	-
F0ZWHJG01A92ZD	gi|342637513|gb|AFTD01011420.1|	17638	17854	+
F0ZWHJG01A9302	gi|342480751|gb|AFTD01153720.1|	2597	2202	-
F0ZWHJG01A934J	gi|342526731|gb|AFTD01108244.1|	2989	2628	-
F0ZWHJG01A9391	gi|342516215|gb|AFTD01118345.1|	47031	47424	+
F0ZWHJG01A93SX	gi|342513234|gb|AFTD01121321.1|	20409	20861	+
F0ZWHJG01A93WS	gi|342561775|gb|AFTD01073677.1|	1118	741	-
F0ZWHJG01A94CB	gi|342608447|gb|AFTD01040485.1|	72442	72615	+
F0ZWHJG01A94L9	gi|342566538|gb|AFTD01068914.1|	19370	19194	-
F0ZWHJG01A94XO	gi|342527855|gb|AFTD01107120.1|	61410	60942	-
F0ZWHJG01A9550	gi|342572713|gb|AFTD01062739.1|	3417	3470	+
F0ZWHJG01A95V2	gi|342571895|gb|AFTD01063557.1|	9837	10275	+
F0ZWHJG01A95Y9	gi|342629338|gb|AFTD01019594.1|	19962	20391	+
F0ZWHJG01A95YA	gi|342596975|gb|AFTD01051957.1|	35801	35528	-
F0ZWHJG01A96DU	gi|342569352|gb|AFTD01066100.1|	631	277	-
F0ZWHJG01A96SS	gi|342605584|gb|AFTD01043348.1|	8303	7872	-
F0ZWHJG01A96TG	gi|342614396|gb|AFTD01034536.1|	104234	103841	-
F0ZWHJG01A97BB	gi|342557565|gb|AFTD01077887.1|	138737	139006	+
F0ZWHJG01A97EK	gi|342608733|gb|AFTD01040199.1|	27020	27461	+
F0ZWHJG01A97GU	gi|342609301|gb|AFTD01039631.1|	13620	13240	-
F0ZWHJG01A97O8	gi|342511546|gb|AFTD01123009.1|	3731	3442	-
F0ZWHJG01A97SW	gi|342631344|gb|AFTD01017588.1|	23636	23530	-
F0ZWHJG01A98AC	gi|342614569|gb|AFTD01034363.1|	13795	13899	+
F0ZWHJG01A991E	gi|342610744|gb|AFTD01038188.1|	51741	52023	+
F0ZWHJG01A9946	gi|342596232|gb|AFTD01052700.1|	18284	17996	-
F0ZWHJG01A99SA	gi|342601715|gb|AFTD01047217.1|	64306	63928	-
F0ZWHJG01A99WM	gi|342642908|gb|AFTD01006025.1|	36313	36709	+
F0ZWHJG01A99YV	gi|342529926|gb|AFTD01105049.1|	77355	77774	+
F0ZWHJG01A9A1P	gi|342605020|gb|AFTD01043912.1|	27684	27506	-
F0ZWHJG01A9A1T	gi|342621106|gb|AFTD01027826.1|	11097	10978	-
F0ZWHJG01A9A52	gi|342609068|gb|AFTD01039864.1|	9780	9462	-
F0ZWHJG01A9AM5	gi|342602968|gb|AFTD01045964.1|	134242	133966	-
F0ZWHJG01A9AX8	gi|342513227|gb|AFTD01121328.1|	19944	20236	+
F0ZWHJG01A9BFY	gi|342629835|gb|AFTD01019097.1|	6201	6489	+
F0ZWHJG01A9CIQ	gi|342595135|gb|AFTD01053797.1|	29773	29383	-
F0ZWHJG01A9CPQ	gi|342505105|gb|AFTD01129450.1|	31230	31459	+
F0ZWHJG01A9D1U	gi|342577069|gb|AFTD01061095.1|	67940	67643	-
F0ZWHJG01A9DMV	gi|342538419|gb|AFTD01096556.1|	68275	68074	-
F0ZWHJG01A9DR1	gi|342537846|gb|AFTD01097129.1|	43151	42898	-
F0ZWHJG01A9DTX	gi|342475969|gb|AFTD01158502.1|	63563	63386	-
F0ZWHJG01A9E3X	gi|342591591|gb|AFTD01056095.1|	10392	10045	-
F0ZWHJG01A9E8Y	gi|342502022|gb|AFTD01132449.1|	3107	2766	-
F0ZWHJG01A9EFJ	gi|342588203|gb|AFTD01057331.1|	29218	29567	+
F0ZWHJG01A9ELL	gi|342528892|gb|AFTD01106083.1|	21938	21800	-
F0ZWHJG01A9F2M	gi|342535541|gb|AFTD01099434.1|	44911	45089	+
F0ZWHJG01A9FAY	gi|342616613|gb|AFTD01032319.1|	5919	6005	+
F0ZWHJG01A9FBO	gi|342621556|gb|AFTD01027376.1|	10441	9954	-
F0ZWHJG01A9FIC	gi|342502465|gb|AFTD01132006.1|	21951	21869	-
F0ZWHJG01A9FUC	gi|342614470|gb|AFTD01034462.1|	130083	129785	-
F0ZWHJG01A9FYV	gi|342530584|gb|AFTD01104391.1|	3253	3550	+
F0ZWHJG01A9GJS	gi|342624188|gb|AFTD01024744.1|	1065	1431	+
F0ZWHJG01A9GPS	gi|342493456|gb|AFTD01141015.1|	46258	46666	+
F0ZWHJG01A9H4Q	gi|342594807|gb|AFTD01054125.1|	513	560	+
F0ZWHJG01A9HYH	gi|342503065|gb|AFTD01131490.1|	34227	33890	-
F0ZWHJG01A9I16	gi|342496184|gb|AFTD01138287.1|	5521	5308	-
F0ZWHJG01A9IB1	gi|342488602|gb|AFTD01145869.1|	3373	3065	-
F0ZWHJG01A9IKQ	gi|342631394|gb|AFTD01017538.1|	44200	43862	-
F0ZWHJG01A9IVP	gi|342578030|gb|AFTD01060755.1|	55010	54942	-
F0ZWHJG01A9JED	gi|342620740|gb|AFTD01028192.1|	58982	59354	+
F0ZWHJG01A9JP0	gi|342641555|gb|AFTD01007378.1|	1229	1664	+
F0ZWHJG01A9K0C	gi|342528925|gb|AFTD01106050.1|	12708	13138	+
F0ZWHJG01A9KRO	gi|342598149|gb|AFTD01050783.1|	18378	18076	-
F0ZWHJG01A9L1F	gi|342576504|gb|AFTD01061282.1|	69515	69905	+
F0ZWHJG01A9LC2	gi|342526615|gb|AFTD01108360.1|	14361	14702	+
F0ZWHJG01A9LNF	gi|342648888|gb|AFTD01000240.1|	17185	17640	+
F0ZWHJG01A9LO4	gi|342495978|gb|AFTD01138493.1|	8504	8241	-
F0ZWHJG01A9LPY	gi|342523096|gb|AFTD01111879.1|	55471	55776	+
F0ZWHJG01A9LRH	gi|342613214|gb|AFTD01035718.1|	32210	32389	+
F0ZWHJG01A9LSA	gi|342603485|gb|AFTD01045447.1|	354	576	+
F0ZWHJG01A9LVS	gi|342474849|gb|AFTD01159622.1|	10964	11014	+
F0ZWHJG01A9LXR	gi|342529208|gb|AFTD01105767.1|	60300	60613	+
F0ZWHJG01A9ME2	gi|342577069|gb|AFTD01061095.1|	21835	21670	-
F0ZWHJG01A9MGP	gi|342566045|gb|AFTD01069407.1|	570	164	-
F0ZWHJG01A9N5C	gi|342502255|gb|AFTD01132216.1|	8137	7989	-
F0ZWHJG01A9NHQ	gi|342377086|gb|AFTD01256452.1|	984	1182	+
F0ZWHJG01A9NJM	gi|342596354|gb|AFTD01052578.1|	16768	17038	+
F0ZWHJG01A9NQQ	gi|342504029|gb|AFTD01130526.1|	22392	22235	-
F0ZWHJG01A9NW2	gi|342556433|gb|AFTD01079019.1|	60923	61042	+
F0ZWHJG01A9O7U	gi|342610169|gb|AFTD01038763.1|	6117	5985	-
F0ZWHJG01A9OOM	gi|342515635|gb|AFTD01118922.1|	1374	1786	+
F0ZWHJG01A9PQR	gi|342601433|gb|AFTD01047499.1|	7465	7270	-
F0ZWHJG01A9QBF	gi|342526881|gb|AFTD01108094.1|	4399	4687	+
F0ZWHJG01A9QJ1	gi|342613410|gb|AFTD01035522.1|	1792	1504	-
F0ZWHJG01A9QPY	gi|342614447|gb|AFTD01034485.1|	11182	11364	+
F0ZWHJG01A9QQL	gi|342639953|gb|AFTD01008980.1|	27104	27221	+
F0ZWHJG01A9QVY	gi|342637604|gb|AFTD01011329.1|	10443	10384	-
F0ZWHJG01A9QWR	gi|342555551|gb|AFTD01079901.1|	19484	19312	-
F0ZWHJG01A9RXZ	gi|342560486|gb|AFTD01074966.1|	2716	2932	+
F0ZWHJG01A9S6E	gi|342517278|gb|AFTD01117386.1|	6059	6334	+
F0ZWHJG01A9S9M	gi|342568864|gb|AFTD01066588.1|	609	407	-
F0ZWHJG01A9SGQ	gi|342644479|gb|AFTD01004454.1|	4656	4239	-
F0ZWHJG01A9SV2	gi|342577069|gb|AFTD01061095.1|	21832	21758	-
F0ZWHJG01A9T16	gi|342560339|gb|AFTD01075113.1|	4465	4151	-
F0ZWHJG01A9T88	gi|342505153|gb|AFTD01129402.1|	78149	78481	+
F0ZWHJG01A9TW1	gi|342521247|gb|AFTD01113720.1|	40126	39739	-
F0ZWHJG01A9U25	gi|342518605|gb|AFTD01116187.1|	2466	2033	-
F0ZWHJG01A9VCG	gi|342526558|gb|AFTD01108417.1|	5819	5755	-
F0ZWHJG01A9VXP	gi|342550114|gb|AFTD01085338.1|	3531	3144	-
F0ZWHJG01A9WB3	gi|342591392|gb|AFTD01056195.1|	65193	65492	+
F0ZWHJG01A9WQ9	gi|342623235|gb|AFTD01025697.1|	36144	36368	+
F0ZWHJG01A9WYO	gi|342558322|gb|AFTD01077130.1|	36800	36540	-
F0ZWHJG01A9XMA	gi|342494058|gb|AFTD01140413.1|	30653	30161	-
F0ZWHJG01A9XMQ	gi|342610110|gb|AFTD01038822.1|	57468	57895	+
F0ZWHJG01A9XOW	gi|342608571|gb|AFTD01040361.1|	5220	5607	+
F0ZWHJG01A9XPR	gi|342608384|gb|AFTD01040548.1|	15266	14863	-
F0ZWHJG01A9XX7	gi|342495978|gb|AFTD01138493.1|	8402	8241	-
F0ZWHJG01A9XYX	gi|342640947|gb|AFTD01007986.1|	44062	43842	-
F0ZWHJG01A9Y1R	gi|342496091|gb|AFTD01138380.1|	27625	27922	+
F0ZWHJG01A9YAP	gi|342606033|gb|AFTD01042899.1|	18230	17819	-
F0ZWHJG01A9YDA	gi|342556409|gb|AFTD01079043.1|	2457	2723	+
F0ZWHJG01A9YGX	gi|342517637|gb|AFTD01117039.1|	32446	32829	+
F0ZWHJG01A9YRL	gi|342646944|gb|AFTD01001989.1|	3118	3432	+
F0ZWHJG01A9YTH	gi|342643120|gb|AFTD01005813.1|	14322	14392	+
F0ZWHJG01A9YUO	gi|342553025|gb|AFTD01082427.1|	65155	65491	+
F0ZWHJG01A9Z0U	gi|342504029|gb|AFTD01130526.1|	22336	22200	-
F0ZWHJG01A9Z99	gi|342492711|gb|AFTD01141760.1|	15552	15785	+
F0ZWHJG01A9ZCW	gi|342613711|gb|AFTD01035221.1|	4616	4210	-
F0ZWHJG01A9ZL1	gi|342563643|gb|AFTD01071809.1|	3864	3657	-
F0ZWHJG01A9ZWM	gi|342638262|gb|AFTD01010671.1|	32115	32014	-
F0ZWHJG01AD013	gi|342533222|gb|AFTD01101753.1|	12965	12824	-
F0ZWHJG01AD0IF	gi|342560378|gb|AFTD01075074.1|	13482	13184	-
F0ZWHJG01AD0NE	gi|342569708|gb|AFTD01065744.1|	18216	18543	+
F0ZWHJG01AD0RM	gi|342611166|gb|AFTD01037766.1|	70807	71125	+
F0ZWHJG01AD0RT	gi|342541742|gb|AFTD01093233.1|	26819	26993	+
F0ZWHJG01AD0Z4	gi|342605230|gb|AFTD01043702.1|	12624	12549	-
F0ZWHJG01AD1RF	gi|342503709|gb|AFTD01130846.1|	1514	1628	+
F0ZWHJG01AD34P	gi|342370987|gb|AFTD01262551.1|	1052	646	-
F0ZWHJG01AD3ML	gi|342560278|gb|AFTD01075174.1|	16960	17095	+
F0ZWHJG01AD3YV	gi|342504727|gb|AFTD01129828.1|	294	443	+
F0ZWHJG01AD4DP	gi|342390511|gb|AFTD01243029.1|	567	195	-
F0ZWHJG01AD4J5	gi|342559253|gb|AFTD01076199.1|	63088	62793	-
F0ZWHJG01AD65B	gi|342578223|gb|AFTD01060690.1|	7975	8198	+
F0ZWHJG01AD6P3	gi|342500277|gb|AFTD01134194.1|	3166	2758	-
F0ZWHJG01AD6PE	gi|342590391|gb|AFTD01056598.1|	12909	12733	-
F0ZWHJG01AD6S4	gi|342501102|gb|AFTD01133369.1|	4265	4591	+
F0ZWHJG01AD7TB	gi|342372794|gb|AFTD01260744.1|	181	90	-
F0ZWHJG01AD7Y0	gi|342626504|gb|AFTD01022428.1|	42658	42364	-
F0ZWHJG01AD9NV	gi|342597332|gb|AFTD01051600.1|	20262	20308	+
F0ZWHJG01AD9XC	gi|342515958|gb|AFTD01118600.1|	17110	17567	+
F0ZWHJG01ADK16	gi|342498652|gb|AFTD01135819.1|	12894	13224	+
F0ZWHJG01ADK4X	gi|342524236|gb|AFTD01110739.1|	21119	21319	+
F0ZWHJG01ADK5P	gi|342521398|gb|AFTD01113574.1|	54248	53885	-
F0ZWHJG01ADK8N	gi|342540650|gb|AFTD01094325.1|	17414	17043	-
F0ZWHJG01ADLBU	gi|342629944|gb|AFTD01018988.1|	17594	17545	-
F0ZWHJG01ADLE7	gi|342565122|gb|AFTD01070330.1|	38552	39019	+
F0ZWHJG01ADLK4	gi|342577069|gb|AFTD01061095.1|	22516	22344	-
F0ZWHJG01ADLLA	gi|342540681|gb|AFTD01094294.1|	87132	86822	-
F0ZWHJG01ADLP2	gi|342608389|gb|AFTD01040543.1|	12424	12543	+
F0ZWHJG01ADLPF	gi|342609068|gb|AFTD01039864.1|	9850	9481	-
F0ZWHJG01ADLQN	gi|342502630|gb|AFTD01131841.1|	4070	4128	+
F0ZWHJG01ADLRH	gi|342613953|gb|AFTD01034979.1|	28312	28763	+
F0ZWHJG01ADLT2	gi|342590187|gb|AFTD01056666.1|	11362	11052	-
F0ZWHJG01ADN3U	gi|342559985|gb|AFTD01075467.1|	15880	16025	+
F0ZWHJG01ADN62	gi|342516458|gb|AFTD01118115.1|	17674	17572	-
F0ZWHJG01ADO2E	gi|342608761|gb|AFTD01040171.1|	1818	1909	+
F0ZWHJG01ADOCR	gi|342648686|gb|AFTD01000441.1|	19507	19741	+
F0ZWHJG01ADOR4	gi|342518618|gb|AFTD01116174.1|	33855	34112	+
F0ZWHJG01ADOUU	gi|342584035|gb|AFTD01058750.1|	2804	3155	+
F0ZWHJG01ADOX5	gi|342569353|gb|AFTD01066099.1|	11903	11550	-
F0ZWHJG01ADR1I	gi|342514263|gb|AFTD01120292.1|	1660	1997	+
F0ZWHJG01ADR8N	gi|342544493|gb|AFTD01090482.1|	46815	46662	-
F0ZWHJG01ADRJW	gi|342619329|gb|AFTD01029603.1|	17543	17631	+
F0ZWHJG01ADRNG	gi|342623027|gb|AFTD01025905.1|	31918	31856	-
F0ZWHJG01ADRPA	gi|342567223|gb|AFTD01068229.1|	4113	3866	-
F0ZWHJG01ADRYQ	gi|342557638|gb|AFTD01077814.1|	12496	12874	+
F0ZWHJG01ADT9K	gi|342555881|gb|AFTD01079571.1|	15571	15212	-
F0ZWHJG01ADUA2	gi|342572725|gb|AFTD01062727.1|	6913	7286	+
F0ZWHJG01ADUAP	gi|342609234|gb|AFTD01039698.1|	1013	542	-
F0ZWHJG01ADUES	gi|342554673|gb|AFTD01080779.1|	17265	17078	-
F0ZWHJG01ADUNE	gi|342515091|gb|AFTD01119464.1|	46632	46993	+
F0ZWHJG01ADUR2	gi|342616287|gb|AFTD01032645.1|	8951	9312	+
F0ZWHJG01ADVC8	gi|342595520|gb|AFTD01053412.1|	8135	8207	+
F0ZWHJG01ADW82	gi|342600167|gb|AFTD01048765.1|	7832	7457	-
F0ZWHJG01ADW84	gi|342552768|gb|AFTD01082684.1|	11229	10797	-
F0ZWHJG01ADX7S	gi|342625777|gb|AFTD01023155.1|	31921	32273	+
F0ZWHJG01ADX9D	gi|342517637|gb|AFTD01117039.1|	32897	33200	+
F0ZWHJG01ADXGQ	gi|342630879|gb|AFTD01018053.1|	4274	3973	-
F0ZWHJG01ADXJ0	gi|342522085|gb|AFTD01112890.1|	937	1338	+
F0ZWHJG01ADXNO	gi|342526210|gb|AFTD01108765.1|	12930	12506	-
F0ZWHJG01ADXPG	gi|342505516|gb|AFTD01129039.1|	12275	12455	+
F0ZWHJG01ADXTC	gi|342512587|gb|AFTD01121968.1|	18868	19285	+
F0ZWHJG01ADXU2	gi|342614011|gb|AFTD01034921.1|	48122	47915	-
F0ZWHJG01ADYRY	gi|342512560|gb|AFTD01121995.1|	133	343	+
F0ZWHJG01AE11Z	gi|342513293|gb|AFTD01121262.1|	19566	19415	-
F0ZWHJG01AE1PN	gi|342498995|gb|AFTD01135476.1|	21978	21794	-
F0ZWHJG01AE201	gi|342638887|gb|AFTD01010046.1|	26388	26451	+
F0ZWHJG01AE2H4	gi|342603543|gb|AFTD01045389.1|	26758	26381	-
F0ZWHJG01AE2HV	gi|342645267|gb|AFTD01003666.1|	1946	1579	-
F0ZWHJG01AE3XQ	gi|342548135|gb|AFTD01087317.1|	8473	8723	+
F0ZWHJG01AE3ZC	gi|342634727|gb|AFTD01014206.1|	4791	4873	+
F0ZWHJG01AE3ZW	gi|342593644|gb|AFTD01055073.1|	3274	3492	+
F0ZWHJG01AE443	gi|342570405|gb|AFTD01065047.1|	5315	5016	-
F0ZWHJG01AE527	gi|342541810|gb|AFTD01093165.1|	2603	2476	-
F0ZWHJG01AE54K	gi|342497137|gb|AFTD01137334.1|	2966	3202	+
F0ZWHJG01AE56E	gi|342566823|gb|AFTD01068629.1|	7441	7770	+
F0ZWHJG01AE5KS	gi|342516851|gb|AFTD01117805.1|	10649	11088	+
F0ZWHJG01AE5PE	gi|342491339|gb|AFTD01143132.1|	1552	1216	-
F0ZWHJG01AE65E	gi|342598380|gb|AFTD01050552.1|	16727	16984	+
F0ZWHJG01AE6E3	gi|342644777|gb|AFTD01004156.1|	3845	3889	+
F0ZWHJG01AE6J2	gi|342546339|gb|AFTD01088636.1|	81486	81145	-
F0ZWHJG01AE6S7	gi|342599052|gb|AFTD01049880.1|	26689	27075	+
F0ZWHJG01AE747	gi|342609899|gb|AFTD01039033.1|	85647	85750	+
F0ZWHJG01AE76W	gi|342535391|gb|AFTD01099584.1|	8649	8253	-
F0ZWHJG01AE840	gi|342634701|gb|AFTD01014232.1|	5359	4905	-
F0ZWHJG01AE896	gi|342540682|gb|AFTD01094293.1|	32569	32800	+
F0ZWHJG01AE8K5	gi|342516636|gb|AFTD01117978.1|	26082	26222	+
F0ZWHJG01AE8L9	gi|342491355|gb|AFTD01143116.1|	11578	12042	+
F0ZWHJG01AE8T5	gi|342597980|gb|AFTD01050952.1|	8033	8414	+
F0ZWHJG01AE8ZO	gi|342642710|gb|AFTD01006223.1|	17897	17552	-
F0ZWHJG01AE9VW	gi|342612285|gb|AFTD01036647.1|	23279	23422	+
F0ZWHJG01AE9XS	gi|342615144|gb|AFTD01033788.1|	30249	30582	+
F0ZWHJG01AEA87	gi|342576868|gb|AFTD01061162.1|	91903	91421	-
F0ZWHJG01AEAAU	gi|342541686|gb|AFTD01093289.1|	72346	71957	-
F0ZWHJG01AEANI	gi|342527797|gb|AFTD01107178.1|	8632	9093	+
F0ZWHJG01AEAUS	gi|342617462|gb|AFTD01031470.1|	49947	49761	-
F0ZWHJG01AEBAO	gi|342609256|gb|AFTD01039676.1|	19422	19330	-
F0ZWHJG01AEC2M	gi|342482333|gb|AFTD01152138.1|	32656	32962	+
F0ZWHJG01AEC3U	gi|342527816|gb|AFTD01107159.1|	11845	11701	-
F0ZWHJG01AECR3	gi|342568980|gb|AFTD01066472.1|	20588	20954	+
F0ZWHJG01AECSW	gi|342586266|gb|AFTD01058002.1|	4556	4855	+
F0ZWHJG01AECU4	gi|342502341|gb|AFTD01132130.1|	2330	2629	+
F0ZWHJG01AED5N	gi|342545244|gb|AFTD01089731.1|	46749	46230	-
F0ZWHJG01AEDKW	gi|342627903|gb|AFTD01021029.1|	8601	8259	-
F0ZWHJG01AEDN9	gi|342647624|gb|AFTD01001309.1|	33983	33683	-
F0ZWHJG01AEDWF	gi|342628616|gb|AFTD01020316.1|	103770	103687	-
F0ZWHJG01AEEHK	gi|342501033|gb|AFTD01133438.1|	2025	2391	+
F0ZWHJG01AEF05	gi|342545400|gb|AFTD01089575.1|	13041	12711	-
F0ZWHJG01AEF0J	gi|342630559|gb|AFTD01018373.1|	27892	27954	+
F0ZWHJG01AEG33	gi|342628531|gb|AFTD01020401.1|	9567	9183	-
F0ZWHJG01AEG66	gi|342648888|gb|AFTD01000240.1|	17345	17579	+
F0ZWHJG01AEG93	gi|342536451|gb|AFTD01098524.1|	39418	39751	+
F0ZWHJG01AEGBQ	gi|342642744|gb|AFTD01006189.1|	83412	83669	+
F0ZWHJG01AEGXU	gi|342558212|gb|AFTD01077240.1|	42737	42437	-
F0ZWHJG01AEHD5	gi|342645924|gb|AFTD01003009.1|	55302	55468	+
F0ZWHJG01AEHHU	gi|342525302|gb|AFTD01109673.1|	12577	12446	-
F0ZWHJG01AEHN9	gi|342566241|gb|AFTD01069211.1|	51208	50996	-
F0ZWHJG01AEHPW	gi|342540388|gb|AFTD01094587.1|	37114	37295	+
F0ZWHJG01AEKDH	gi|342579004|gb|AFTD01060429.1|	4199	3824	-
F0ZWHJG01AEKS0	gi|342492695|gb|AFTD01141776.1|	3954	4051	+
F0ZWHJG01AEM3B	gi|342611079|gb|AFTD01037853.1|	21063	21191	+
F0ZWHJG01AEMA3	gi|342578009|gb|AFTD01060762.1|	67432	67957	+
F0ZWHJG01AEMNP	gi|342610488|gb|AFTD01038444.1|	22452	22144	-
F0ZWHJG01AEMPP	gi|342532237|gb|AFTD01102738.1|	38204	37982	-
F0ZWHJG01AEMW3	gi|342600381|gb|AFTD01048551.1|	21837	21419	-
F0ZWHJG01AENIR	gi|342622840|gb|AFTD01026092.1|	105184	104794	-
F0ZWHJG01AENOC	gi|342542920|gb|AFTD01092055.1|	14073	14442	+
F0ZWHJG01AENRG	gi|342565968|gb|AFTD01069484.1|	15187	14851	-
F0ZWHJG01AENSP	gi|342566397|gb|AFTD01069055.1|	5001	4564	-
F0ZWHJG01AENTC	gi|342531737|gb|AFTD01103238.1|	58072	57802	-
F0ZWHJG01AEP33	gi|342566204|gb|AFTD01069248.1|	74596	74271	-
F0ZWHJG01AEPAR	gi|342488115|gb|AFTD01146356.1|	6774	6845	+
F0ZWHJG01AEPB3	gi|342509542|gb|AFTD01125013.1|	45125	45508	+
F0ZWHJG01AEPZU	gi|342527214|gb|AFTD01107761.1|	24460	24582	+
F0ZWHJG01AEQ5J	gi|342512442|gb|AFTD01122113.1|	27207	27542	+
F0ZWHJG01AEQC0	gi|342629386|gb|AFTD01019546.1|	6967	6697	-
F0ZWHJG01AEQWL	gi|342525599|gb|AFTD01109376.1|	17724	17965	+
F0ZWHJG01AEQYC	gi|342509837|gb|AFTD01124718.1|	7394	7457	+
F0ZWHJG01AERBA	gi|342571925|gb|AFTD01063527.1|	26939	27027	+
F0ZWHJG01AES0U	gi|342648686|gb|AFTD01000441.1|	20015	20454	+
F0ZWHJG01AET36	gi|342591418|gb|AFTD01056182.1|	18654	18276	-
F0ZWHJG01AET47	gi|342483190|gb|AFTD01151281.1|	21751	21568	-
F0ZWHJG01AETHP	gi|342530167|gb|AFTD01104808.1|	134	21	-
F0ZWHJG01AEUBS	gi|342486440|gb|AFTD01148031.1|	28947	28740	-
F0ZWHJG01AEUES	gi|342648317|gb|AFTD01000676.1|	18839	18488	-
F0ZWHJG01AEV3I	gi|342642450|gb|AFTD01006483.1|	1344	1180	-
F0ZWHJG01AEVGZ	gi|342647048|gb|AFTD01001885.1|	1933	2269	+
F0ZWHJG01AEVHZ	gi|342628190|gb|AFTD01020742.1|	51298	50970	-
F0ZWHJG01AEVKU	gi|342618596|gb|AFTD01030336.1|	51185	51343	+
F0ZWHJG01AEVMZ	gi|342548405|gb|AFTD01087047.1|	41383	41094	-
F0ZWHJG01AEVN2	gi|342634668|gb|AFTD01014265.1|	28989	28741	-
F0ZWHJG01AEVNR	gi|342615762|gb|AFTD01033170.1|	2750	3155	+
F0ZWHJG01AEVVT	gi|342601817|gb|AFTD01047115.1|	2793	2657	-
F0ZWHJG01AEW7N	gi|342559713|gb|AFTD01075739.1|	8857	9253	+
F0ZWHJG01AEW9P	gi|342541657|gb|AFTD01093318.1|	2419	2286	-
F0ZWHJG01AEWBS	gi|342627511|gb|AFTD01021421.1|	51860	52103	+
F0ZWHJG01AEWSB	gi|342644498|gb|AFTD01004435.1|	77526	77659	+
F0ZWHJG01AEWST	gi|342518701|gb|AFTD01116091.1|	5485	5680	+
F0ZWHJG01AEXL0	gi|342630350|gb|AFTD01018582.1|	13721	13404	-
F0ZWHJG01AEXOG	gi|342633493|gb|AFTD01015440.1|	12719	12601	-
F0ZWHJG01AEY44	gi|342577657|gb|AFTD01060893.1|	762	975	+
F0ZWHJG01AEY7Z	gi|342623083|gb|AFTD01025849.1|	45029	44607	-
F0ZWHJG01AEZCA	gi|342515837|gb|AFTD01118721.1|	7156	7067	-
F0ZWHJG01AEZNQ	gi|342617214|gb|AFTD01031718.1|	15353	15740	+
F0ZWHJG01AEZSN	gi|342609353|gb|AFTD01039579.1|	25280	25190	-
F0ZWHJG01AEZWJ	gi|342505177|gb|AFTD01129378.1|	30957	30643	-
F0ZWHJG01AF002	gi|342539713|gb|AFTD01095262.1|	2866	2717	-
F0ZWHJG01AF0G3	gi|342607073|gb|AFTD01041859.1|	4425	4017	-
F0ZWHJG01AF0JN	gi|342461954|gb|AFTD01172419.1|	205	49	-
F0ZWHJG01AF0LM	gi|342538538|gb|AFTD01096437.1|	86313	86489	+
F0ZWHJG01AF0LZ	gi|342554677|gb|AFTD01080775.1|	5932	6120	+
F0ZWHJG01AF0M5	gi|342533113|gb|AFTD01101862.1|	15440	15826	+
F0ZWHJG01AF0VS	gi|342598201|gb|AFTD01050731.1|	483	582	+
F0ZWHJG01AF1GE	gi|342638473|gb|AFTD01010460.1|	41412	41678	+
F0ZWHJG01AF1IE	gi|342594771|gb|AFTD01054161.1|	4287	4374	+
F0ZWHJG01AF1L2	gi|342595869|gb|AFTD01053063.1|	27902	28263	+
F0ZWHJG01AF1Z2	gi|342571950|gb|AFTD01063502.1|	15606	15765	+
F0ZWHJG01AF2A5	gi|342565045|gb|AFTD01070407.1|	8301	8466	+
F0ZWHJG01AF2EB	gi|342525612|gb|AFTD01109363.1|	1917	2209	+
F0ZWHJG01AF2IK	gi|342538631|gb|AFTD01096344.1|	74223	74354	+
F0ZWHJG01AF320	gi|342601722|gb|AFTD01047210.1|	39848	40324	+
F0ZWHJG01AF35C	gi|342566823|gb|AFTD01068629.1|	7441	7768	+
F0ZWHJG01AF3KH	gi|342636998|gb|AFTD01011935.1|	33738	33665	-
F0ZWHJG01AF3UY	gi|342540579|gb|AFTD01094396.1|	2752	3061	+
F0ZWHJG01AF4A8	gi|342524236|gb|AFTD01110739.1|	21552	21798	+
F0ZWHJG01AF4FV	gi|342520934|gb|AFTD01114008.1|	4232	3857	-
F0ZWHJG01AF4LT	gi|342506705|gb|AFTD01127850.1|	15072	15449	+
F0ZWHJG01AF4W4	gi|342475371|gb|AFTD01159100.1|	4728	4849	+
F0ZWHJG01AF5EF	gi|342444763|gb|AFTD01189610.1|	711	338	-
F0ZWHJG01AF67W	gi|342512459|gb|AFTD01122096.1|	7880	8070	+
F0ZWHJG01AF6L8	gi|342526926|gb|AFTD01108049.1|	12237	11898	-
F0ZWHJG01AF6LC	gi|342614443|gb|AFTD01034489.1|	16416	16020	-
F0ZWHJG01AF6O6	gi|342625975|gb|AFTD01022957.1|	24147	24618	+
F0ZWHJG01AF6SP	gi|342614470|gb|AFTD01034462.1|	130394	130326	-
F0ZWHJG01AF76N	gi|342490447|gb|AFTD01144024.1|	552	712	+
F0ZWHJG01AF7J8	gi|342620498|gb|AFTD01028434.1|	4095	4455	+
F0ZWHJG01AF7R2	gi|342554358|gb|AFTD01081094.1|	2674	2245	-
F0ZWHJG01AF7UM	gi|342504269|gb|AFTD01130286.1|	13853	14014	+
F0ZWHJG01AF801	gi|342527323|gb|AFTD01107652.1|	10966	11303	+
F0ZWHJG01AF8GL	gi|342532118|gb|AFTD01102857.1|	10185	10526	+
F0ZWHJG01AF8KK	gi|342591733|gb|AFTD01056023.1|	3866	4270	+
F0ZWHJG01AF8ZU	gi|342617193|gb|AFTD01031739.1|	61087	60948	-
F0ZWHJG01AF90R	gi|342554503|gb|AFTD01080949.1|	94047	93665	-
F0ZWHJG01AF9BL	gi|342648888|gb|AFTD01000240.1|	21202	21028	-
F0ZWHJG01AF9OU	gi|342387445|gb|AFTD01246095.1|	428	18	-
F0ZWHJG01AF9TE	gi|342625388|gb|AFTD01023544.1|	125909	126096	+
F0ZWHJG01AF9UF	gi|342480989|gb|AFTD01153482.1|	3135	2770	-
F0ZWHJG01AF9VH	gi|342647557|gb|AFTD01001376.1|	23553	23902	+
F0ZWHJG01AFA4H	gi|342640437|gb|AFTD01008496.1|	33638	34011	+
F0ZWHJG01AFB7Q	gi|342597652|gb|AFTD01051280.1|	18210	18282	+
F0ZWHJG01AFBFB	gi|342646162|gb|AFTD01002771.1|	16002	15810	-
F0ZWHJG01AFBOE	gi|342562974|gb|AFTD01072478.1|	4652	4600	-
F0ZWHJG01AFBPX	gi|342608511|gb|AFTD01040421.1|	9365	9426	+
F0ZWHJG01AFBU7	gi|342597647|gb|AFTD01051285.1|	10644	10257	-
F0ZWHJG01AFBYO	gi|342559985|gb|AFTD01075467.1|	6917	7151	+
F0ZWHJG01AFC3I	gi|342486404|gb|AFTD01148067.1|	10604	11028	+
F0ZWHJG01AFC5B	gi|342559879|gb|AFTD01075573.1|	26477	26122	-
F0ZWHJG01AFC99	gi|342592060|gb|AFTD01055865.1|	64571	64888	+
F0ZWHJG01AFCD7	gi|342492223|gb|AFTD01142248.1|	497	906	+
F0ZWHJG01AFD9N	gi|342539290|gb|AFTD01095685.1|	4774	5051	+
F0ZWHJG01AFDAX	gi|342550050|gb|AFTD01085402.1|	126739	127128	+
F0ZWHJG01AFDD4	gi|342559910|gb|AFTD01075542.1|	9756	9344	-
F0ZWHJG01AFEBL	gi|342588221|gb|AFTD01057325.1|	55955	55843	-
F0ZWHJG01AFEKO	gi|342638910|gb|AFTD01010023.1|	46563	46090	-
F0ZWHJG01AFENU	gi|342522283|gb|AFTD01112692.1|	9290	9000	-
F0ZWHJG01AFEVC	gi|342489823|gb|AFTD01144648.1|	902	550	-
F0ZWHJG01AFF6G	gi|342640950|gb|AFTD01007983.1|	92227	92074	-
F0ZWHJG01AFFCF	gi|342553976|gb|AFTD01081476.1|	12949	13072	+
F0ZWHJG01AFFPX	gi|342621549|gb|AFTD01027383.1|	13831	14157	+
F0ZWHJG01AFFRL	gi|342515705|gb|AFTD01118852.1|	6522	6809	+
F0ZWHJG01AFFS2	gi|342597473|gb|AFTD01051459.1|	49029	49419	+
F0ZWHJG01AFFU0	gi|342594130|gb|AFTD01054801.1|	28183	28670	+
F0ZWHJG01AFFUF	gi|342531720|gb|AFTD01103255.1|	3188	3238	+
F0ZWHJG01AFGB2	gi|342561790|gb|AFTD01073662.1|	1969	2333	+
F0ZWHJG01AFGIK	gi|342643744|gb|AFTD01005189.1|	29743	29794	+
F0ZWHJG01AFGK1	gi|342579116|gb|AFTD01060391.1|	2217	1809	-
F0ZWHJG01AFH5R	gi|342526204|gb|AFTD01108771.1|	1229	903	-
F0ZWHJG01AFH6V	gi|342644519|gb|AFTD01004414.1|	17098	16866	-
F0ZWHJG01AFHHB	gi|342543923|gb|AFTD01091052.1|	120832	120984	+
F0ZWHJG01AFHI5	gi|342570140|gb|AFTD01065312.1|	18212	18391	+
F0ZWHJG01AFHPL	gi|342629524|gb|AFTD01019408.1|	43611	43840	+
F0ZWHJG01AFI7J	gi|342507392|gb|AFTD01127163.1|	3662	4006	+
F0ZWHJG01AFIT8	gi|342517118|gb|AFTD01117546.1|	1169	1289	+
F0ZWHJG01AFIW3	gi|342640950|gb|AFTD01007983.1|	88127	87745	-
F0ZWHJG01AFJLY	gi|342554208|gb|AFTD01081244.1|	21144	21322	+
F0ZWHJG01AFJSB	gi|342636464|gb|AFTD01012469.1|	11711	11938	+
F0ZWHJG01AFJSZ	gi|342594453|gb|AFTD01054479.1|	37377	37102	-
F0ZWHJG01AFKI1	gi|342618380|gb|AFTD01030552.1|	45999	46142	+
F0ZWHJG01AFKKF	gi|342619316|gb|AFTD01029616.1|	27630	27311	-
F0ZWHJG01AFL24	gi|342592737|gb|AFTD01055527.1|	49770	50065	+
F0ZWHJG01AFL2I	gi|342571951|gb|AFTD01063501.1|	2319	2418	+
F0ZWHJG01AFN1N	gi|342644352|gb|AFTD01004581.1|	31839	31978	+
F0ZWHJG01AFN89	gi|342552204|gb|AFTD01083248.1|	18489	18930	+
F0ZWHJG01AFO1X	gi|342623930|gb|AFTD01025002.1|	17931	18225	+
F0ZWHJG01AFOEN	gi|342630254|gb|AFTD01018678.1|	86204	86439	+
F0ZWHJG01AFP04	gi|342519162|gb|AFTD01115642.1|	2709	3132	+
F0ZWHJG01AFP0E	gi|342557283|gb|AFTD01078169.1|	28057	27738	-
F0ZWHJG01AFP1O	gi|342594453|gb|AFTD01054479.1|	37362	37036	-
F0ZWHJG01AFPQQ	gi|342404776|gb|AFTD01229597.1|	88	3	-
F0ZWHJG01AFQSJ	gi|342594619|gb|AFTD01054313.1|	18334	18684	+
F0ZWHJG01AFR00	gi|342521812|gb|AFTD01113163.1|	58659	58268	-
F0ZWHJG01AFR9T	gi|342615762|gb|AFTD01033170.1|	2750	2919	+
F0ZWHJG01AFRBK	gi|342533738|gb|AFTD01101237.1|	536	931	+
F0ZWHJG01AFRHG	gi|342526987|gb|AFTD01107988.1|	14641	14217	-
F0ZWHJG01AFRJO	gi|342528465|gb|AFTD01106510.1|	1521	1176	-
F0ZWHJG01AFRVD	gi|342636358|gb|AFTD01012575.1|	18205	18289	+
F0ZWHJG01AFS2F	gi|342499908|gb|AFTD01134563.1|	826	999	+
F0ZWHJG01AFS32	gi|342615996|gb|AFTD01032936.1|	15188	14794	-
F0ZWHJG01AFSJV	gi|342620756|gb|AFTD01028176.1|	9727	9418	-
F0ZWHJG01AFSP5	gi|342571986|gb|AFTD01063466.1|	1451	1111	-
F0ZWHJG01AFSRQ	gi|342647191|gb|AFTD01001742.1|	39658	39329	-
F0ZWHJG01AFSZH	gi|342505145|gb|AFTD01129410.1|	1139	1255	+
F0ZWHJG01AFT2L	gi|342526545|gb|AFTD01108430.1|	45553	45091	-
F0ZWHJG01AFT6D	gi|342642009|gb|AFTD01006924.1|	20626	20262	-
F0ZWHJG01AFTZL	gi|342616418|gb|AFTD01032514.1|	18914	18644	-
F0ZWHJG01AFUHU	gi|342566823|gb|AFTD01068629.1|	7441	7771	+
F0ZWHJG01AFUQV	gi|342631080|gb|AFTD01017852.1|	96131	96353	+
F0ZWHJG01AFUW9	gi|342566823|gb|AFTD01068629.1|	7553	7834	+
F0ZWHJG01AFVFF	gi|342594485|gb|AFTD01054447.1|	40329	40380	+
F0ZWHJG01AFW7F	gi|342576501|gb|AFTD01061283.1|	11529	11229	-
F0ZWHJG01AFWDC	gi|342606686|gb|AFTD01042246.1|	6180	6383	+
F0ZWHJG01AFX64	gi|342634445|gb|AFTD01014488.1|	12064	12441	+
F0ZWHJG01AFXHZ	gi|342641502|gb|AFTD01007431.1|	63273	63364	+
F0ZWHJG01AFXOU	gi|342597006|gb|AFTD01051926.1|	35913	35477	-
F0ZWHJG01AFXZ9	gi|342518656|gb|AFTD01116136.1|	48148	48592	+
F0ZWHJG01AFYJO	gi|342607653|gb|AFTD01041279.1|	1975	2048	+
F0ZWHJG01AFYK3	gi|342637088|gb|AFTD01011845.1|	1135	785	-
F0ZWHJG01AFYKD	gi|342545908|gb|AFTD01089067.1|	14485	14598	+
F0ZWHJG01AFYMB	gi|342511872|gb|AFTD01122683.1|	9269	9709	+
F0ZWHJG01AFYWQ	gi|342546024|gb|AFTD01088951.1|	37179	36862	-
F0ZWHJG01AG08D	gi|342530982|gb|AFTD01103993.1|	15246	15120	-
F0ZWHJG01AG08S	gi|342565678|gb|AFTD01069774.1|	6611	6200	-
F0ZWHJG01AG0AT	gi|342631141|gb|AFTD01017791.1|	4641	4962	+
F0ZWHJG01AG0CP	gi|342552680|gb|AFTD01082772.1|	9883	9477	-
F0ZWHJG01AG0E2	gi|342597615|gb|AFTD01051317.1|	32892	33270	+
F0ZWHJG01AG0M2	gi|342624105|gb|AFTD01024827.1|	62497	62135	-
F0ZWHJG01AG1S2	gi|342539720|gb|AFTD01095255.1|	639	294	-
F0ZWHJG01AG27V	gi|342515822|gb|AFTD01118736.1|	30332	29851	-
F0ZWHJG01AG2BT	gi|342614444|gb|AFTD01034488.1|	3069	3378	+
F0ZWHJG01AG2I7	gi|342608254|gb|AFTD01040678.1|	10115	10375	+
F0ZWHJG01AG2Q8	gi|342648636|gb|AFTD01000491.1|	2	359	+
F0ZWHJG01AG325	gi|342630080|gb|AFTD01018852.1|	33939	34423	+
F0ZWHJG01AG424	gi|342514820|gb|AFTD01119735.1|	14021	14316	+
F0ZWHJG01AG42Q	gi|342534476|gb|AFTD01100499.1|	860	454	-
F0ZWHJG01AG42V	gi|342561055|gb|AFTD01074397.1|	4945	4591	-
F0ZWHJG01AG43B	gi|342640152|gb|AFTD01008781.1|	1742	1904	+
F0ZWHJG01AG46W	gi|342636825|gb|AFTD01012108.1|	29700	30108	+
F0ZWHJG01AG492	gi|342494584|gb|AFTD01139887.1|	816	358	-
F0ZWHJG01AG4I7	gi|342538479|gb|AFTD01096496.1|	18957	19346	+
F0ZWHJG01AG525	gi|342628139|gb|AFTD01020793.1|	17460	16992	-
F0ZWHJG01AG5ES	gi|342595966|gb|AFTD01052966.1|	10688	10748	+
F0ZWHJG01AG5MP	gi|342372794|gb|AFTD01260744.1|	207	36	-
F0ZWHJG01AG5RY	gi|342565311|gb|AFTD01070141.1|	35377	35040	-
F0ZWHJG01AG5U3	gi|342571789|gb|AFTD01063663.1|	47207	47611	+
F0ZWHJG01AG6PC	gi|342503792|gb|AFTD01130763.1|	8253	8310	+
F0ZWHJG01AG73K	gi|342502178|gb|AFTD01132293.1|	23776	23388	-
F0ZWHJG01AG74H	gi|342627058|gb|AFTD01021874.1|	11194	11386	+
F0ZWHJG01AG7CL	gi|342563768|gb|AFTD01071684.1|	7613	7299	-
F0ZWHJG01AG7FK	gi|342622824|gb|AFTD01026108.1|	7214	7558	+
F0ZWHJG01AG8FA	gi|342639821|gb|AFTD01009112.1|	25925	25542	-
F0ZWHJG01AG8QB	gi|342505717|gb|AFTD01128838.1|	22022	21647	-
F0ZWHJG01AG8T2	gi|342563998|gb|AFTD01071454.1|	1824	1427	-
F0ZWHJG01AG91R	gi|342630963|gb|AFTD01017969.1|	3509	3922	+
F0ZWHJG01AG97P	gi|342379205|gb|AFTD01254333.1|	599	932	+
F0ZWHJG01AGAIA	gi|342484947|gb|AFTD01149524.1|	15603	15294	-
F0ZWHJG01AGALA	gi|342499388|gb|AFTD01135083.1|	38464	38153	-
F0ZWHJG01AGAUR	gi|342542399|gb|AFTD01092576.1|	22466	22873	+
F0ZWHJG01AGB0D	gi|342643080|gb|AFTD01005853.1|	84116	84551	+
F0ZWHJG01AGB5K	gi|342514093|gb|AFTD01120462.1|	3400	3730	+
F0ZWHJG01AGBRS	gi|342622994|gb|AFTD01025938.1|	44648	44873	+
F0ZWHJG01AGBZM	gi|342579004|gb|AFTD01060429.1|	4197	4023	-
F0ZWHJG01AGCRK	gi|342488511|gb|AFTD01145960.1|	7945	7670	-
F0ZWHJG01AGD63	gi|342568864|gb|AFTD01066588.1|	705	472	-
F0ZWHJG01AGDCS	gi|342554778|gb|AFTD01080674.1|	8651	8849	+
F0ZWHJG01AGDRI	gi|342626177|gb|AFTD01022755.1|	18747	18349	-
F0ZWHJG01AGDUO	gi|342544111|gb|AFTD01090864.1|	11491	11157	-
F0ZWHJG01AGE9H	gi|342623795|gb|AFTD01025137.1|	37394	37173	-
F0ZWHJG01AGFNG	gi|342546339|gb|AFTD01088636.1|	81336	81185	-
F0ZWHJG01AGFZR	gi|342608701|gb|AFTD01040231.1|	43128	42774	-
F0ZWHJG01AGG35	gi|342594453|gb|AFTD01054479.1|	37377	37110	-
F0ZWHJG01AGG4G	gi|342636969|gb|AFTD01011964.1|	11200	11617	+
F0ZWHJG01AGG83	gi|342621629|gb|AFTD01027303.1|	12391	12198	-
F0ZWHJG01AGGKI	gi|342638970|gb|AFTD01009963.1|	40842	41175	+
F0ZWHJG01AGGOO	gi|342510813|gb|AFTD01123742.1|	22577	22452	-
F0ZWHJG01AGGPL	gi|342504995|gb|AFTD01129560.1|	35574	35880	+
F0ZWHJG01AGGZY	gi|342368360|gb|AFTD01265178.1|	1691	1897	+
F0ZWHJG01AGHE5	gi|342528094|gb|AFTD01106881.1|	1953	2275	+
F0ZWHJG01AGHJ6	gi|342531734|gb|AFTD01103241.1|	59441	59510	+
F0ZWHJG01AGHRZ	gi|342635388|gb|AFTD01013545.1|	3274	3041	-
F0ZWHJG01AGHT1	gi|342607573|gb|AFTD01041359.1|	104191	103883	-
F0ZWHJG01AGI6Y	gi|342597473|gb|AFTD01051459.1|	65756	65530	-
F0ZWHJG01AGI92	gi|342472760|gb|AFTD01161711.1|	4731	4363	-
F0ZWHJG01AGIVP	gi|342618318|gb|AFTD01030614.1|	37131	37456	+
F0ZWHJG01AGJ0E	gi|342563610|gb|AFTD01071842.1|	6648	6495	-
F0ZWHJG01AGJ20	gi|342535291|gb|AFTD01099684.1|	7605	7199	-
F0ZWHJG01AGJCA	gi|342622826|gb|AFTD01026106.1|	10474	10841	+
F0ZWHJG01AGJCZ	gi|342518897|gb|AFTD01115899.1|	45115	44750	-
F0ZWHJG01AGJEA	gi|342554627|gb|AFTD01080825.1|	98502	99032	+
F0ZWHJG01AGJNJ	gi|342595183|gb|AFTD01053749.1|	5998	6360	+
F0ZWHJG01AGJPH	gi|342622994|gb|AFTD01025938.1|	44491	44923	+
F0ZWHJG01AGJZW	gi|342534170|gb|AFTD01100805.1|	4422	4021	-
F0ZWHJG01AGKRO	gi|342559324|gb|AFTD01076128.1|	17921	17875	-
F0ZWHJG01AGKUO	gi|342626036|gb|AFTD01022896.1|	5051	4704	-
F0ZWHJG01AGLBR	gi|342527668|gb|AFTD01107307.1|	7138	7030	-
F0ZWHJG01AGM0Q	gi|342538401|gb|AFTD01096574.1|	56701	57196	+
F0ZWHJG01AGMDO	gi|342640950|gb|AFTD01007983.1|	88114	87821	-
F0ZWHJG01AGMGQ	gi|342596029|gb|AFTD01052903.1|	40908	40727	-
F0ZWHJG01AGMV9	gi|342637109|gb|AFTD01011824.1|	1239	1563	+
F0ZWHJG01AGN14	gi|342638394|gb|AFTD01010539.1|	46636	46228	-
F0ZWHJG01AGN5T	gi|342571238|gb|AFTD01064214.1|	3699	3933	+
F0ZWHJG01AGNJI	gi|342506722|gb|AFTD01127833.1|	21073	20894	-
F0ZWHJG01AGNK7	gi|342543336|gb|AFTD01091639.1|	9998	10049	+
F0ZWHJG01AGNYM	gi|342605220|gb|AFTD01043712.1|	10418	10097	-
F0ZWHJG01AGOI2	gi|342606540|gb|AFTD01042392.1|	17149	17524	+
F0ZWHJG01AGPFY	gi|342548392|gb|AFTD01087060.1|	17834	18161	+
F0ZWHJG01AGPGY	gi|342580220|gb|AFTD01060023.1|	47109	47319	+
F0ZWHJG01AGPH3	gi|342380769|gb|AFTD01252771.1|	382	143	-
F0ZWHJG01AGPHF	gi|342621652|gb|AFTD01027280.1|	4870	4696	-
F0ZWHJG01AGPPP	gi|342548278|gb|AFTD01087174.1|	19384	19757	+
F0ZWHJG01AGPRA	gi|342577850|gb|AFTD01060822.1|	20758	21160	+
F0ZWHJG01AGPTZ	gi|342620592|gb|AFTD01028340.1|	29206	29668	+
F0ZWHJG01AGQ8B	gi|342626980|gb|AFTD01021952.1|	6751	6441	-
F0ZWHJG01AGQBG	gi|342611095|gb|AFTD01037837.1|	14383	14642	+
F0ZWHJG01AGQTC	gi|342605015|gb|AFTD01043917.1|	5263	5608	+
F0ZWHJG01AGQU7	gi|342567151|gb|AFTD01068301.1|	5695	6111	+
F0ZWHJG01AGQWF	gi|342621455|gb|AFTD01027477.1|	5686	5482	-
F0ZWHJG01AGRS5	gi|342596330|gb|AFTD01052602.1|	13070	13008	-
F0ZWHJG01AGSC3	gi|342595610|gb|AFTD01053322.1|	7183	7609	+
F0ZWHJG01AGTFO	gi|342579551|gb|AFTD01060245.1|	73674	73993	+
F0ZWHJG01AGTI3	gi|342558237|gb|AFTD01077215.1|	44665	44986	+
F0ZWHJG01AGTTA	gi|342391550|gb|AFTD01241990.1|	197	468	+
F0ZWHJG01AGTUP	gi|342608447|gb|AFTD01040485.1|	72525	72905	+
F0ZWHJG01AGU23	gi|342554165|gb|AFTD01081287.1|	67830	67679	-
F0ZWHJG01AGUMR	gi|342607413|gb|AFTD01041519.1|	6012	5621	-
F0ZWHJG01AGUNS	gi|342569065|gb|AFTD01066387.1|	291	505	+
F0ZWHJG01AGUNW	gi|342640950|gb|AFTD01007983.1|	92573	92388	-
F0ZWHJG01AGUV1	gi|342542445|gb|AFTD01092530.1|	10811	10375	-
F0ZWHJG01AGUZL	gi|342529926|gb|AFTD01105049.1|	76319	76721	+
F0ZWHJG01AGV6U	gi|342647173|gb|AFTD01001760.1|	24204	24330	+
F0ZWHJG01AGVN2	gi|342503911|gb|AFTD01130644.1|	25525	25357	-
F0ZWHJG01AGVSQ	gi|342632662|gb|AFTD01016271.1|	2167	2530	+
F0ZWHJG01AGWQC	gi|342608200|gb|AFTD01040732.1|	123712	123878	+
F0ZWHJG01AGWW1	gi|342571240|gb|AFTD01064212.1|	106846	107135	+
F0ZWHJG01AGXAN	gi|342592447|gb|AFTD01055672.1|	21347	20968	-
F0ZWHJG01AGXCZ	gi|342485282|gb|AFTD01149189.1|	9847	9581	-
F0ZWHJG01AGY28	gi|342608413|gb|AFTD01040519.1|	100360	100488	+
F0ZWHJG01AGYX7	gi|342539510|gb|AFTD01095465.1|	39786	39951	+
F0ZWHJG01AGZO4	gi|342636334|gb|AFTD01012599.1|	171307	170966	-
F0ZWHJG01AGZT9	gi|342570141|gb|AFTD01065311.1|	41968	41582	-
F0ZWHJG01AGZWH	gi|342566398|gb|AFTD01069054.1|	5192	4930	-
F0ZWHJG01AH059	gi|342617452|gb|AFTD01031480.1|	18395	18469	+
F0ZWHJG01AH0B1	gi|342568864|gb|AFTD01066588.1|	664	424	-
F0ZWHJG01AH0BQ	gi|342555306|gb|AFTD01080146.1|	13345	12900	-
F0ZWHJG01AH0IU	gi|342636409|gb|AFTD01012524.1|	4378	3913	-
F0ZWHJG01AH0RC	gi|342567149|gb|AFTD01068303.1|	972	642	-
F0ZWHJG01AH0SI	gi|342620335|gb|AFTD01028597.1|	1064	1294	+
F0ZWHJG01AH113	gi|342603406|gb|AFTD01045526.1|	2725	2556	-
F0ZWHJG01AH134	gi|342630548|gb|AFTD01018384.1|	32632	32191	-
F0ZWHJG01AH2D9	gi|342623424|gb|AFTD01025508.1|	13502	13877	+
F0ZWHJG01AH2R9	gi|342621388|gb|AFTD01027544.1|	15927	15785	-
F0ZWHJG01AH34Q	gi|342627289|gb|AFTD01021643.1|	527	908	+
F0ZWHJG01AH35B	gi|342599694|gb|AFTD01049238.1|	75544	75685	+
F0ZWHJG01AH47K	gi|342485314|gb|AFTD01149157.1|	26963	27052	+
F0ZWHJG01AH4AC	gi|342610513|gb|AFTD01038419.1|	40952	40785	-
F0ZWHJG01AH4CO	gi|342642709|gb|AFTD01006224.1|	21807	21420	-
F0ZWHJG01AH4JN	gi|342507178|gb|AFTD01127377.1|	28874	28489	-
F0ZWHJG01AH4TD	gi|342605556|gb|AFTD01043376.1|	691	954	+
F0ZWHJG01AH5C0	gi|342519949|gb|AFTD01114973.1|	51035	50870	-
F0ZWHJG01AH5HM	gi|342568676|gb|AFTD01066776.1|	49499	49761	+
F0ZWHJG01AH5I1	gi|342529402|gb|AFTD01105573.1|	13199	13660	+
F0ZWHJG01AH5JZ	gi|342518379|gb|AFTD01116407.1|	4111	3753	-
F0ZWHJG01AH658	gi|342644498|gb|AFTD01004435.1|	76203	76542	+
F0ZWHJG01AH66X	gi|342640653|gb|AFTD01008280.1|	84651	84798	+
F0ZWHJG01AH69J	gi|342553207|gb|AFTD01082245.1|	44249	43899	-
F0ZWHJG01AH6KT	gi|342572630|gb|AFTD01062822.1|	775	433	-
F0ZWHJG01AH6LT	gi|342549866|gb|AFTD01085586.1|	19694	19212	-
F0ZWHJG01AH7CV	gi|342532237|gb|AFTD01102738.1|	38179	37766	-
F0ZWHJG01AH7DX	gi|342561081|gb|AFTD01074371.1|	1251	920	-
F0ZWHJG01AH7ML	gi|342527214|gb|AFTD01107761.1|	24141	24582	+
F0ZWHJG01AH7RK	gi|342581313|gb|AFTD01059658.1|	25296	25732	+
F0ZWHJG01AH7RV	gi|342597215|gb|AFTD01051717.1|	30916	30533	-
F0ZWHJG01AH80P	gi|342508552|gb|AFTD01126003.1|	49405	49125	-
F0ZWHJG01AH8B5	gi|342528892|gb|AFTD01106083.1|	22072	21991	-
F0ZWHJG01AH8P8	gi|342567622|gb|AFTD01067830.1|	14807	15161	+
F0ZWHJG01AH92A	gi|342524828|gb|AFTD01110147.1|	54951	55113	+
F0ZWHJG01AH9B8	gi|342597006|gb|AFTD01051926.1|	35899	35539	-
F0ZWHJG01AH9HF	gi|342592276|gb|AFTD01055757.1|	504	838	+
F0ZWHJG01AH9KK	gi|342628140|gb|AFTD01020792.1|	9356	9000	-
F0ZWHJG01AH9MK	gi|342510668|gb|AFTD01123887.1|	64602	64917	+
F0ZWHJG01AH9P4	gi|342642559|gb|AFTD01006374.1|	143215	142854	-
F0ZWHJG01AHAJD	gi|342643902|gb|AFTD01005031.1|	17027	16712	-
F0ZWHJG01AHAQL	gi|342609223|gb|AFTD01039709.1|	4447	4789	+
F0ZWHJG01AHAV5	gi|342531245|gb|AFTD01103730.1|	11091	10763	-
F0ZWHJG01AHAXS	gi|342520903|gb|AFTD01114039.1|	70711	70459	-
F0ZWHJG01AHAZ6	gi|342571320|gb|AFTD01064132.1|	23962	23520	-
F0ZWHJG01AHB1L	gi|342557580|gb|AFTD01077872.1|	67423	66961	-
F0ZWHJG01AHBCR	gi|342561803|gb|AFTD01073649.1|	2611	2826	+
F0ZWHJG01AHBS7	gi|342643315|gb|AFTD01005618.1|	143426	143606	+
F0ZWHJG01AHCGM	gi|342576838|gb|AFTD01061171.1|	61947	62352	+
F0ZWHJG01AHCPC	gi|342507548|gb|AFTD01127007.1|	8509	8871	+
F0ZWHJG01AHCZC	gi|342595645|gb|AFTD01053287.1|	43427	43010	-
F0ZWHJG01AHDGE	gi|342584599|gb|AFTD01058562.1|	49454	49199	-
F0ZWHJG01AHE5Q	gi|342637296|gb|AFTD01011637.1|	18939	18756	-
F0ZWHJG01AHE6A	gi|342624486|gb|AFTD01024446.1|	45050	44626	-
F0ZWHJG01AHEL7	gi|342527027|gb|AFTD01107948.1|	58029	58297	+
F0ZWHJG01AHETT	gi|342572511|gb|AFTD01062941.1|	1711	2128	+
F0ZWHJG01AHF82	gi|342524952|gb|AFTD01110023.1|	74438	74301	-
F0ZWHJG01AHFAY	gi|342608419|gb|AFTD01040513.1|	63077	63015	-
F0ZWHJG01AHFMU	gi|342529402|gb|AFTD01105573.1|	13199	13660	+
F0ZWHJG01AHFPK	gi|342613240|gb|AFTD01035692.1|	91684	92101	+
F0ZWHJG01AHFPZ	gi|342528925|gb|AFTD01106050.1|	12725	13136	+
F0ZWHJG01AHG3M	gi|342570021|gb|AFTD01065431.1|	37022	36763	-
F0ZWHJG01AHG9X	gi|342540711|gb|AFTD01094264.1|	7966	7533	-
F0ZWHJG01AHGF5	gi|342615843|gb|AFTD01033089.1|	22275	22667	+
F0ZWHJG01AHGGT	gi|342516851|gb|AFTD01117805.1|	16811	17087	+
F0ZWHJG01AHH2K	gi|342614552|gb|AFTD01034380.1|	51271	50789	-
F0ZWHJG01AHH2V	gi|342482333|gb|AFTD01152138.1|	4808	5278	+
F0ZWHJG01AHH8A	gi|342575857|gb|AFTD01061498.1|	44273	44065	-
F0ZWHJG01AHHNL	gi|342565338|gb|AFTD01070114.1|	19645	19382	-
F0ZWHJG01AHI0M	gi|342640844|gb|AFTD01008089.1|	13989	13583	-
F0ZWHJG01AHISO	gi|342538057|gb|AFTD01096918.1|	28042	28096	+
F0ZWHJG01AHJ1Y	gi|342579897|gb|AFTD01060131.1|	56377	56677	+
F0ZWHJG01AHJ27	gi|342546354|gb|AFTD01088621.1|	40552	40888	+
F0ZWHJG01AHJCN	gi|342534681|gb|AFTD01100294.1|	32605	33030	+
F0ZWHJG01AHJDL	gi|342601691|gb|AFTD01047241.1|	5972	6272	+
F0ZWHJG01AHJS6	gi|342546003|gb|AFTD01088972.1|	14535	14877	+
F0ZWHJG01AHJYT	gi|342521330|gb|AFTD01113639.1|	22238	21942	-
F0ZWHJG01AHKHO	gi|342538425|gb|AFTD01096550.1|	39854	40067	+
F0ZWHJG01AHKS8	gi|342475925|gb|AFTD01158546.1|	22300	22226	-
F0ZWHJG01AHL5P	gi|342625789|gb|AFTD01023143.1|	21083	20829	-
F0ZWHJG01AHL87	gi|342512510|gb|AFTD01122045.1|	17472	17865	+
F0ZWHJG01AHLT1	gi|342616302|gb|AFTD01032630.1|	5958	6127	+
F0ZWHJG01AHLY0	gi|342613065|gb|AFTD01035867.1|	31674	31993	+
F0ZWHJG01AHM3I	gi|342531545|gb|AFTD01103430.1|	71045	71149	+
F0ZWHJG01AHM4B	gi|342520099|gb|AFTD01114825.1|	22786	22390	-
F0ZWHJG01AHMIO	gi|342540344|gb|AFTD01094631.1|	5344	5262	-
F0ZWHJG01AHMNB	gi|342556173|gb|AFTD01079279.1|	27535	27941	+
F0ZWHJG01AHN12	gi|342557299|gb|AFTD01078153.1|	41666	41610	-
F0ZWHJG01AHN37	gi|342512489|gb|AFTD01122066.1|	2620	3098	+
F0ZWHJG01AHN77	gi|342514829|gb|AFTD01119726.1|	2146	2498	+
F0ZWHJG01AHN7P	gi|342600503|gb|AFTD01048429.1|	44223	44552	+
F0ZWHJG01AHNFI	gi|342545908|gb|AFTD01089067.1|	14513	14598	+
F0ZWHJG01AHNYP	gi|342607852|gb|AFTD01041080.1|	6879	7156	+
F0ZWHJG01AHOJW	gi|342528340|gb|AFTD01106635.1|	16130	15781	-
F0ZWHJG01AHP5P	gi|342533835|gb|AFTD01101140.1|	9466	9821	+
F0ZWHJG01AHP9U	gi|342593544|gb|AFTD01055123.1|	12033	11788	-
F0ZWHJG01AHPAC	gi|342497362|gb|AFTD01137109.1|	2325	2780	+
F0ZWHJG01AHPGF	gi|342517691|gb|AFTD01116985.1|	35423	35773	+
F0ZWHJG01AHPQC	gi|342619396|gb|AFTD01029536.1|	67541	67795	+
F0ZWHJG01AHPXJ	gi|342601693|gb|AFTD01047239.1|	60675	61004	+
F0ZWHJG01AHQNN	gi|342648921|gb|AFTD01000207.1|	49728	49959	+
F0ZWHJG01AHR21	gi|342563966|gb|AFTD01071486.1|	32131	32543	+
F0ZWHJG01AHRXB	gi|342596991|gb|AFTD01051941.1|	20233	19744	-
F0ZWHJG01AHSA6	gi|342565566|gb|AFTD01069886.1|	128	62	-
F0ZWHJG01AHSAB	gi|342527585|gb|AFTD01107390.1|	7490	7419	-
F0ZWHJG01AHSC7	gi|342532428|gb|AFTD01102547.1|	14352	13985	-
F0ZWHJG01AHSDS	gi|342380769|gb|AFTD01252771.1|	380	92	-
F0ZWHJG01AHSJP	gi|342412545|gb|AFTD01221828.1|	1	305	+
F0ZWHJG01AHSJW	gi|342600401|gb|AFTD01048531.1|	77212	77682	+
F0ZWHJG01AHSV2	gi|342624982|gb|AFTD01023950.1|	21600	21251	-
F0ZWHJG01AHSXH	gi|342539857|gb|AFTD01095118.1|	79895	79803	-
F0ZWHJG01AHTD9	gi|342605609|gb|AFTD01043323.1|	5202	4834	-
F0ZWHJG01AHTFD	gi|342566067|gb|AFTD01069385.1|	26508	26413	-
F0ZWHJG01AHTJX	gi|342496953|gb|AFTD01137518.1|	17090	17349	+
F0ZWHJG01AHTY4	gi|342618596|gb|AFTD01030336.1|	51225	51572	+
F0ZWHJG01AHTZC	gi|342595652|gb|AFTD01053280.1|	5861	6098	+
F0ZWHJG01AHUDT	gi|342623127|gb|AFTD01025805.1|	27782	28197	+
F0ZWHJG01AHUK0	gi|342592165|gb|AFTD01055812.1|	25718	25364	-
F0ZWHJG01AHUR4	gi|342515847|gb|AFTD01118711.1|	14638	14311	-
F0ZWHJG01AHV4F	gi|342500044|gb|AFTD01134427.1|	36593	36666	+
F0ZWHJG01AHVHI	gi|342594634|gb|AFTD01054298.1|	29648	29695	+
F0ZWHJG01AHVI1	gi|342486531|gb|AFTD01147940.1|	12248	12603	+
F0ZWHJG01AHVI8	gi|342614543|gb|AFTD01034389.1|	43133	42937	-
F0ZWHJG01AHWCR	gi|342640842|gb|AFTD01008091.1|	13222	12838	-
F0ZWHJG01AHWE0	gi|342553036|gb|AFTD01082416.1|	38700	38353	-
F0ZWHJG01AHWJV	gi|342531457|gb|AFTD01103518.1|	66211	65857	-
F0ZWHJG01AHWS4	gi|342568674|gb|AFTD01066778.1|	6539	6974	+
F0ZWHJG01AHX0P	gi|342561803|gb|AFTD01073649.1|	2679	3083	+
F0ZWHJG01AHX2M	gi|342600520|gb|AFTD01048412.1|	76477	76370	-
F0ZWHJG01AHXLF	gi|342621127|gb|AFTD01027805.1|	105878	106190	+
F0ZWHJG01AHXNJ	gi|342557646|gb|AFTD01077806.1|	92522	92034	-
F0ZWHJG01AHXZ0	gi|342598923|gb|AFTD01050009.1|	41918	42041	+
F0ZWHJG01AHY1O	gi|342513652|gb|AFTD01120903.1|	234	514	+
F0ZWHJG01AHY3T	gi|342535562|gb|AFTD01099413.1|	57116	57520	+
F0ZWHJG01AHY95	gi|342573499|gb|AFTD01062308.1|	2167	2496	+
F0ZWHJG01AHYI6	gi|342533113|gb|AFTD01101862.1|	14458	14716	+
F0ZWHJG01AHZC0	gi|342494621|gb|AFTD01139850.1|	8484	8074	-
F0ZWHJG01AHZCI	gi|342506281|gb|AFTD01128274.1|	54872	55079	+
F0ZWHJG01AHZJ1	gi|342613720|gb|AFTD01035212.1|	31798	32037	+
F0ZWHJG01AHZLC	gi|342591879|gb|AFTD01055955.1|	9981	9670	-
F0ZWHJG01AHZSG	gi|342465353|gb|AFTD01169020.1|	3326	3271	-
F0ZWHJG01AI06J	gi|342571305|gb|AFTD01064147.1|	14378	14297	-
F0ZWHJG01AI0S8	gi|342503792|gb|AFTD01130763.1|	8409	8464	+
F0ZWHJG01AI1LN	gi|342629338|gb|AFTD01019594.1|	36986	36570	-
F0ZWHJG01AI269	gi|342622558|gb|AFTD01026374.1|	2445	2739	+
F0ZWHJG01AI3KY	gi|342541681|gb|AFTD01093294.1|	1542	1137	-
F0ZWHJG01AI3O0	gi|342618560|gb|AFTD01030372.1|	1103	1269	+
F0ZWHJG01AI3TN	gi|342514330|gb|AFTD01120225.1|	1844	1503	-
F0ZWHJG01AI40I	gi|342634172|gb|AFTD01014761.1|	4047	4424	+
F0ZWHJG01AI42U	gi|342541554|gb|AFTD01093421.1|	5139	5304	+
F0ZWHJG01AI4KW	gi|342547327|gb|AFTD01088125.1|	14145	14476	+
F0ZWHJG01AI4MV	gi|342520828|gb|AFTD01114112.1|	76260	76349	+
F0ZWHJG01AI53S	gi|342569560|gb|AFTD01065892.1|	11146	11357	+
F0ZWHJG01AI55Z	gi|342565311|gb|AFTD01070141.1|	35377	34911	-
F0ZWHJG01AI57M	gi|342538779|gb|AFTD01096196.1|	4273	3928	-
F0ZWHJG01AI5U0	gi|342622892|gb|AFTD01026040.1|	115880	116251	+
F0ZWHJG01AI6WM	gi|342563303|gb|AFTD01072149.1|	8317	8703	+
F0ZWHJG01AI6ZU	gi|342620595|gb|AFTD01028337.1|	6380	6757	+
F0ZWHJG01AI72H	gi|342497632|gb|AFTD01136839.1|	66843	66419	-
F0ZWHJG01AI7B2	gi|342528147|gb|AFTD01106828.1|	25557	25278	-
F0ZWHJG01AI7B6	gi|342552595|gb|AFTD01082857.1|	29298	29238	-
F0ZWHJG01AI7CZ	gi|342549266|gb|AFTD01086186.1|	8289	7990	-
F0ZWHJG01AI7HW	gi|342641247|gb|AFTD01007686.1|	26408	26005	-
F0ZWHJG01AI8A6	gi|342557365|gb|AFTD01078087.1|	9774	9315	-
F0ZWHJG01AI8F3	gi|342546010|gb|AFTD01088965.1|	16839	16765	-
F0ZWHJG01AI8KH	gi|342539828|gb|AFTD01095147.1|	846	909	+
F0ZWHJG01AI94P	gi|342511546|gb|AFTD01123009.1|	3713	3442	-
F0ZWHJG01AI9C9	gi|342505738|gb|AFTD01128817.1|	50802	51191	+
F0ZWHJG01AI9DJ	gi|342622820|gb|AFTD01026112.1|	7285	7602	+
F0ZWHJG01AI9R6	gi|342599586|gb|AFTD01049346.1|	22480	22077	-
F0ZWHJG01AI9S8	gi|342629127|gb|AFTD01019805.1|	10013	9628	-
F0ZWHJG01AIA4T	gi|342595286|gb|AFTD01053646.1|	9270	9607	+
F0ZWHJG01AIAU5	gi|342633960|gb|AFTD01014973.1|	35332	35712	+
F0ZWHJG01AIB1Q	gi|342545301|gb|AFTD01089674.1|	3498	3654	+
F0ZWHJG01AIB70	gi|342601795|gb|AFTD01047137.1|	14394	13960	-
F0ZWHJG01AIBCT	gi|342567375|gb|AFTD01068077.1|	3354	3495	+
F0ZWHJG01AIBT7	gi|342516636|gb|AFTD01117978.1|	26053	26451	+
F0ZWHJG01AIC9O	gi|342513782|gb|AFTD01120773.1|	87064	87423	+
[truncated: 83,653 more rows]
