# Supplementary material for: Sequencing, Annotation and Analysis of the Syrian Hamster (Mesocricetus auratus) Transcriptome
Source: PLoS One. 2014 Nov 14;9(11):e112617. doi: 10.1371/journal.pone.0112617 (PMC4232415; doi:10.1371/journal.pone.0112617)
Supplement: Table S3 — List of sequences used to infer the phylogenic tree. Table providing the list of contigs and singletons used to construct the phylogenic tree shown in figure 4. All the 611 contigs and singletons in this table have been significantly aligned on the transcriptomes of species having the highest number of commonly aligned sequences. (TXT) [file pone.0112617.s004.pdf]

Syrian hamster transcriptomic sequence of our assembly used for the generation of the phylogenic tree.
maa_c53
maa_c60
maa_c211
maa_c261
maa_c285
maa_c420
maa_c454
maa_c634
maa_c651
maa_c657
maa_c658
maa_c815
maa_c884
maa_c1020
maa_c1184
maa_c1237
maa_c1555
maa_c1769
maa_c1828
maa_c1936
maa_c2027
maa_c2093
maa_c2186
maa_c2278
maa_c2327
maa_c2333
maa_c3132
maa_c7765
maa_c7838
maa_c11096
maa_c15993
maa_c16019
maa_c22175
maa_c33970
maa_c2537
maa_c2966
maa_c3181
maa_c3236
maa_c3598
maa_c3666
maa_c3840
maa_c3918
maa_c4016
maa_c4064
maa_c4263
maa_c4298
maa_c5206
maa_c5223
maa_c5312
maa_c5348
maa_c5389
maa_c5413
maa_c5962
maa_c6088
maa_c6247
maa_c6596
maa_c6745
maa_c6904
maa_c7165
maa_c7306
maa_c7326
maa_c7330
maa_c7534
maa_c7679
maa_c7920
maa_c8118
maa_c8340
maa_c8356
maa_c8403
maa_c8471
maa_c8711
maa_c8931
maa_c9048
maa_c9163
maa_c9570
maa_c10026
maa_c10187
maa_c10777
maa_c10939
maa_c11199
maa_c11246
maa_c11313
maa_c11682
maa_c11844
maa_c11902
maa_c11941
maa_c12185
maa_c12398
maa_c13017
maa_c13093
maa_c13518
maa_c13522
maa_c14061
maa_c14115
maa_c14122
maa_c14149
maa_c15575
maa_c17257
maa_c17385
maa_c17444
maa_c17597
maa_lrc17708
maa_c17874
maa_c18048
maa_c18259
maa_c18261
maa_c18306
maa_c18436
maa_c18556
maa_c18992
maa_c19301
maa_c19526
maa_c19796
maa_c20460
maa_lrc20906
maa_c21016
maa_c21085
maa_c21182
maa_c21370
maa_lrc21433
maa_c22768
maa_c22810
maa_lrc23805
maa_c24235
maa_lrc24284
maa_c24296
maa_c24508
maa_lrc25263
maa_c25291
maa_c25334
maa_c25338
maa_c25358
maa_c25416
maa_c25453
maa_c25483
maa_c25783
maa_c25886
maa_c26683
maa_lrc26869
maa_c27110
maa_c27171
maa_c27313
maa_lrc27506
maa_c27653
maa_c27717
maa_c27990
maa_c28505
maa_c28947
maa_c28962
maa_c29021
maa_c29223
maa_c29441
maa_c29571
maa_c29761
maa_c29981
maa_c30184
maa_c30544
maa_c30693
maa_c30761
maa_c30875
maa_c30915
maa_c30937
maa_c31839
maa_c31860
maa_lrc32113
maa_c32472
maa_c32728
maa_c32819
maa_lrc33277
maa_lrc33432
maa_lrc33651
maa_c33809
maa_c33931
maa_c34208
maa_lrc34681
maa_c42359
maa_c42368
maa_c43251
maa_c43305
maa_c35315
maa_c35371
maa_c35861
maa_c35959
maa_c36387
maa_c37422
maa_c37445
maa_c37995
maa_lrc38324
maa_lrc38586
maa_lrc38651
maa_c38741
maa_c38818
maa_lrc39026
maa_c39362
maa_lrc39393
maa_c39827
maa_lrc40408
maa_c41075
maa_c41413
maa_c42123
maa_c42224
maa_c43151
maa_lrc43979
maa_c57015
maa_lrc60966
maa_c44848
maa_c45322
maa_c45436
maa_c45456
maa_c46063
maa_c46184
maa_c47303
maa_c47391
maa_c47638
maa_c47901
maa_c48018
maa_lrc48069
maa_c48168
maa_c48216
maa_c48590
maa_lrc48738
maa_c48814
maa_c49179
maa_lrc50590
maa_c51630
maa_lrc51921
maa_c52188
maa_c52599
maa_c52996
maa_c53020
maa_c53110
maa_c53322
maa_c53343
maa_c53401
maa_c53406
maa_c53503
maa_lrc53546
maa_c54052
maa_c54252
maa_c54255
maa_c54488
maa_c54638
maa_c54782
maa_c54829
maa_c55048
maa_lrc55085
maa_c55371
maa_lrc55587
maa_c55841
maa_lrc56185
maa_c56235
maa_c56526
maa_lrc57377
maa_c57662
maa_c57842
maa_c57951
maa_c57973
maa_lrc58056
maa_c58147
maa_c58650
maa_lrc58677
maa_c58692
maa_c58710
maa_c59054
maa_c59232
maa_c59381
maa_c59606
maa_c59876
maa_c59952
maa_c60406
maa_c60441
maa_lrc60668
maa_c60721
maa_c60732
maa_c60864
maa_c61757
maa_c62165
F0ZWHJG01A30CZ
F0ZWHJG01A3YMD
F0ZWHJG01A4UNU
F0ZWHJG01A5CAL
F0ZWHJG01A691S
F0ZWHJG01A6XCA
F0ZWHJG01AEPP1
F0ZWHJG01AF4EW
F0ZWHJG01B21NC
F0ZWHJG01B22LJ
F0ZWHJG01B9OXO
F0ZWHJG01BUXYL
F0ZWHJG01C5BY1
F0ZWHJG01AH059
F0ZWHJG01AHKS8
F0ZWHJG01AK2XM
F0ZWHJG01ANO6H
F0ZWHJG01ANTJQ
F0ZWHJG01AOQ4L
F0ZWHJG01AR3F9
F0ZWHJG01AR7ZC
F0ZWHJG01AS138
F0ZWHJG01ASFXQ
F0ZWHJG01ATP55
F0ZWHJG01AVO0N
F0ZWHJG01A03UB
F0ZWHJG01AX7O4
F0ZWHJG01AXA8D
F0ZWHJG01AY161
F0ZWHJG01AYAAA
F0ZWHJG01B055O
F0ZWHJG01B0J3Z
F0ZWHJG01B1W7D
F0ZWHJG01B2ADB
F0ZWHJG01B2HNA
F0ZWHJG01B39JP
F0ZWHJG01B3AGY
F0ZWHJG01B8QJE
F0ZWHJG01B9X2U
F0ZWHJG01BBD8O
F0ZWHJG01BCGFO
F0ZWHJG01BCYB3
F0ZWHJG01BDFTQ
F0ZWHJG01BI6HZ
F0ZWHJG01BJ9V9
F0ZWHJG01BLGO7
F0ZWHJG01BNGNA
F0ZWHJG01BOHP1
F0ZWHJG01BOINX
F0ZWHJG01BPTD5
F0ZWHJG01BRCY3
F0ZWHJG01BVD1N
F0ZWHJG01BVJYX
F0ZWHJG01BW3A0
F0ZWHJG01BW9NE
F0ZWHJG01BWVJN
F0ZWHJG01BX7NJ
F0ZWHJG01BXW05
F0ZWHJG01BY6K9
F0ZWHJG01BYEV2
F0ZWHJG01BZJNT
F0ZWHJG01BZUC2
F0ZWHJG01C116X
F0ZWHJG01C284R
F0ZWHJG01C30XX
F0ZWHJG01C3615
F0ZWHJG01C5N41
F0ZWHJG01C5W9C
F0ZWHJG01C6XON
F0ZWHJG01C6Y76
F0ZWHJG01C7A8G
F0ZWHJG01C7WYL
F0ZWHJG01C8996
F0ZWHJG01CB8UN
F0ZWHJG01CB97D
F0ZWHJG01D3IYN
F0ZWHJG01DI76B
F0ZWHJG01CD210
F0ZWHJG01CDCXG
F0ZWHJG01CE4ZN
F0ZWHJG01CEM6P
F0ZWHJG01CHTWF
F0ZWHJG01CI6BK
F0ZWHJG01CIB6I
F0ZWHJG01CMGEL
F0ZWHJG01CN3P1
F0ZWHJG01CNH18
F0ZWHJG01CPM9M
F0ZWHJG01CRZVV
F0ZWHJG01CTS49
F0ZWHJG01CTWI8
F0ZWHJG01CU34T
F0ZWHJG01CUCPH
F0ZWHJG01CVTBL
F0ZWHJG01D2IIF
F0ZWHJG01D2XKJ
F0ZWHJG01D38E0
F0ZWHJG01D4I4K
F0ZWHJG01D6KJU
F0ZWHJG01D6XSZ
F0ZWHJG01D70A7
F0ZWHJG01D86J0
F0ZWHJG01DAYBT
F0ZWHJG01DD758
F0ZWHJG01DE51W
F0ZWHJG01DEFKA
F0ZWHJG01DETHQ
F0ZWHJG01DEX53
F0ZWHJG01DH6VG
F0ZWHJG01DJ7JD
F0ZWHJG01DLFDA
F0ZWHJG01DN1QG
F0ZWHJG01DONJP
F0ZWHJG01DP36I
F0ZWHJG01DPHNO
F0ZWHJG01DQ4QA
F0ZWHJG01DS2GC
F0ZWHJG01DTFRN
F0ZWHJG01DUF75
F0ZWHJG01DVZAX
F0ZWHJG01DWA7O
F0ZWHJG01DWGIC
F0ZWHJG01DY2MY
F0ZWHJG01DZC32
F0ZWHJG01E0AXO
F0ZWHJG01E0VOK
F0ZWHJG01E2DB6
F0ZWHJG02GLIQO
F0ZWHJG01E4X3E
F0ZWHJG01E5V8N
F0ZWHJG01EAC8B
F0ZWHJG01EAR2R
F0ZWHJG01EB0N7
F0ZWHJG01EDBGW
F0ZWHJG01EDSQ1
F0ZWHJG01EEPOI
F0ZWHJG01EFH2G
F0ZWHJG01EFIPT
F0ZWHJG01EG39K
F0ZWHJG01EG5YY
F0ZWHJG01EID84
F0ZWHJG01EJKL0
F0ZWHJG01ENZN4
F0ZWHJG01EO1C2
F0ZWHJG01EYCRE
F0ZWHJG01EPL9U
F0ZWHJG01EQDVF
F0ZWHJG01EQHJC
F0ZWHJG01ES6PF
F0ZWHJG01EU273
F0ZWHJG01EUQT0
F0ZWHJG01EYMFY
F0ZWHJG02F0F2O
F0ZWHJG02F213P
F0ZWHJG02F3IOV
F0ZWHJG02F3TCG
F0ZWHJG02F4INL
F0ZWHJG02F8QNQ
F0ZWHJG02FG08T
F0ZWHJG02FGAU6
F0ZWHJG02FHKVY
F0ZWHJG02FIZQV
F0ZWHJG02FLU6V
F0ZWHJG02FMKY9
F0ZWHJG02FOYA9
F0ZWHJG02FQO2Y
F0ZWHJG02FQVTQ
F0ZWHJG02FS27L
F0ZWHJG02FUOYD
F0ZWHJG02FUZTL
F0ZWHJG02FVNQJ
F0ZWHJG02FX13L
F0ZWHJG02FXU4S
F0ZWHJG02FYY09
F0ZWHJG02FZ34T
F0ZWHJG02FZLF6
F0ZWHJG02G0207
F0ZWHJG02G123Q
F0ZWHJG02G2UJ9
F0ZWHJG02G3MXR
F0ZWHJG02G4C3I
F0ZWHJG02G4IV2
F0ZWHJG02G4LKQ
F0ZWHJG02G4NH3
F0ZWHJG02G4U6P
F0ZWHJG02G62BC
F0ZWHJG02G64ME
F0ZWHJG02G798A
F0ZWHJG02G8E4W
F0ZWHJG02G8TSO
F0ZWHJG02GAKOE
F0ZWHJG02GAULV
F0ZWHJG02GB725
F0ZWHJG02GBAAH
F0ZWHJG02GCQOO
F0ZWHJG02GD3D2
F0ZWHJG02GDMS9
F0ZWHJG02GG5DB
F0ZWHJG02GG93X
F0ZWHJG02GGE6A
F0ZWHJG02GGMA0
F0ZWHJG02GI0H8
F0ZWHJG02GI63Y
F0ZWHJG02GI9UV
F0ZWHJG02GJ868
F0ZWHJG02GJQLQ
F0ZWHJG02GKFR8
F0ZWHJG02GL5YR
F0ZWHJG02GLOPW
F0ZWHJG02GMENZ
F0ZWHJG02GNFDF
F0ZWHJG02GO13S
F0ZWHJG02GQBLI
F0ZWHJG02GQE3W
F0ZWHJG02GQOXK
F0ZWHJG02GR3FW
F0ZWHJG02GS90B
F0ZWHJG02GTK52
F0ZWHJG02GTQYT
F0ZWHJG02GV199
F0ZWHJG02GW530
F0ZWHJG02GXIC3
F0ZWHJG02GXOTR
F0ZWHJG02GY1KK
F0ZWHJG02GZJKY
F0ZWHJG02H00F3
F0ZWHJG02H2DKV
F0ZWHJG02H33UV
F0ZWHJG02H3BAU
F0ZWHJG02H3V2S
F0ZWHJG02H68JH
F0ZWHJG02H6MNB
F0ZWHJG02HBYR8
F0ZWHJG02HEBAU
F0ZWHJG02I0CWR
F0ZWHJG02H8FC3
F0ZWHJG02H8R5T
F0ZWHJG02H9AGY
F0ZWHJG02HABES
F0ZWHJG02HCKBV
F0ZWHJG02HDLM0
F0ZWHJG02HDPW6
F0ZWHJG02HG3H4
F0ZWHJG02HGW7D
F0ZWHJG02HJ89Q
F0ZWHJG02HJZNJ
F0ZWHJG02HKFMA
F0ZWHJG02HKIJF
F0ZWHJG02HKQG7
F0ZWHJG02HKTGJ
F0ZWHJG02HKTXX
F0ZWHJG02HLNU7
F0ZWHJG02HM7W8
F0ZWHJG02HOD3R
F0ZWHJG02HOXRI
F0ZWHJG02HQO99
F0ZWHJG02HR7QR
F0ZWHJG02HRZY1
F0ZWHJG02HTRF6
F0ZWHJG02HV21T
F0ZWHJG02HWR74
F0ZWHJG02HXGEC
F0ZWHJG02HYA4E
F0ZWHJG02HZI5W
F0ZWHJG02HZJJ0
F0ZWHJG02I0L3F
F0ZWHJG02I1M4Z
F0ZWHJG02I424G
F0ZWHJG02I4KQ5
F0ZWHJG02I4S1A
F0ZWHJG02I6RLK
F0ZWHJG02IDZPW
F0ZWHJG02JUTV3
F0ZWHJG02I7S2U
F0ZWHJG02I7WK3
F0ZWHJG02I9603
F0ZWHJG02I9V7O
F0ZWHJG02IANHT
F0ZWHJG02IAPL4
F0ZWHJG02IESIG
F0ZWHJG02IEUPJ
F0ZWHJG02IF7S0
F0ZWHJG02JODPM
F0ZWHJG02JZSM8
F0ZWHJG02IFY4O
F0ZWHJG02IGQJB
F0ZWHJG02IIX7A
F0ZWHJG02IKWWB
F0ZWHJG02IMCA1
F0ZWHJG02INN4H
F0ZWHJG02IO15H
F0ZWHJG02IO7OF
F0ZWHJG02IQBQG
F0ZWHJG02IQFAG
F0ZWHJG02IQOP9
F0ZWHJG02IQTXC
F0ZWHJG02ISIZZ
F0ZWHJG02IST0P
F0ZWHJG02ITRN2
F0ZWHJG02ITSVV
F0ZWHJG02ITWQ0
F0ZWHJG02IUQX7
F0ZWHJG02IVQ6H
F0ZWHJG02IXO25
F0ZWHJG02IZ5CZ
F0ZWHJG02IZ7F1
F0ZWHJG02IZVP3
F0ZWHJG02J133H
F0ZWHJG02J243Q
F0ZWHJG02J2M8W
F0ZWHJG02J46SF
F0ZWHJG02JAP94
F0ZWHJG02JB2AW
F0ZWHJG02JBY3I
F0ZWHJG02JCB3W
F0ZWHJG02JDTYL
F0ZWHJG02JFQX4
F0ZWHJG02JGUNU
F0ZWHJG02JHJGQ
F0ZWHJG02JHP19
F0ZWHJG02JI3JO
F0ZWHJG02JIB67
F0ZWHJG02JJ3GW
F0ZWHJG02JJNHE
F0ZWHJG02JJVK3
F0ZWHJG02JKPL7
F0ZWHJG02JL4AM
F0ZWHJG02JLQZ0
F0ZWHJG02JPFDM
F0ZWHJG02JU2HK
F0ZWHJG02JUFN2
F0ZWHJG02JV0HX
F0ZWHJG02JXGG8
